# Supplementary material for: Obligate sexual reproduction of a homothallic fungus closely related to the Cryptococcus pathogenic species complex
Source: eLife journal article supplement (doi:10.7554/elife.79114), 2022-06-16
Supplement: fig1-figsupp1-data1 [file Figure_1-figure_supplement_1-source_data_1.pdf › Figure_1-figure_supplement_1-source_data_1.pdf]

### CHEF gel for smaller chromosomes

(switching times of 120-260 seconds)

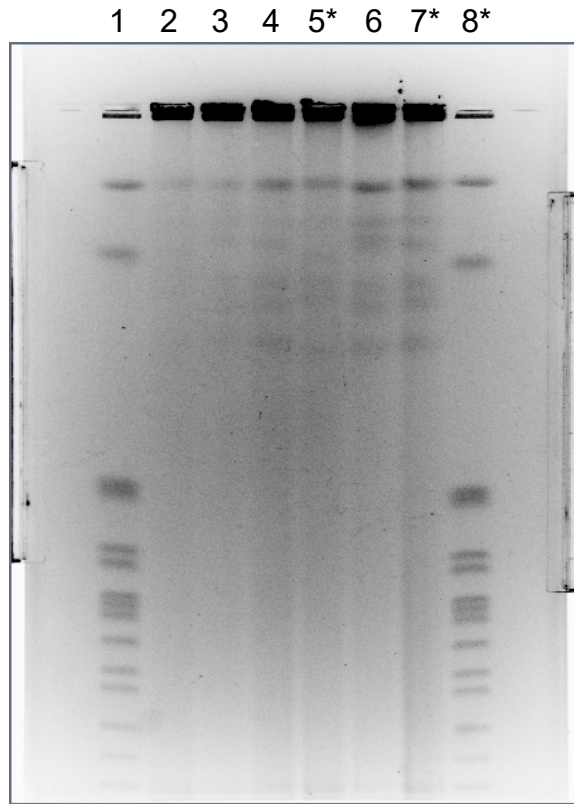

(File: FD\_CHEF\_SmallerChromosomes.jpg)

- 1 - *S. cerevisiae* ladder (Bio-Rad #1703605)
- 2 - *C. depauperatus* CBS7841 (1)
- 3 - *C. depauperatus* CBS7855 (1)
- 4 - *C. depauperatus* CBS7855 (2)
- 5\* - *C. depauperatus* CBS7841 (2)
- 6 - *C. depauperatus* CBS7855 (3)
- 7\* - *C. depauperatus* CBS7855 (4)
- 8\* - *S. cerevisiae* ladder (Bio-Rad #1703605)

### CHEF gel for larger chromosomes

(switching times of 560-700 seconds)

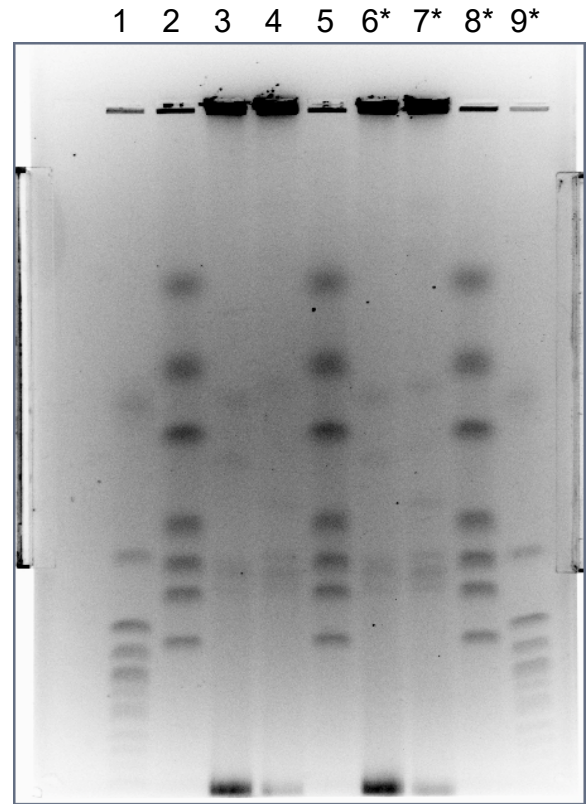

(File: FD\_CHEF\_LargerChromosomes.jpg)

- 1 - *S. cerevisiae* ladder (Bio-Rad #1703605)
- 2 - *H. wingei* ladder (Bio-Rad #1703667)
- 3 - *C. depauperatus* CBS7841 (1)
- 4 - *C. depauperatus* CBS7855 (1)
- 5 - *H. wingei* ladder (Bio-Rad #1703667)
- 6\* - *C. depauperatus* CBS7841 (2)
- 7\* - *C. depauperatus* CBS7855 (2)
- 8\* - *H. wingei* ladder (Bio-Rad #1703667)
- 9\* - *S. cerevisiae* ladder (Bio-Rad #1703605)

Lanes depicted on **Figure 1–figure supplement 1C** are indicated by asterisks in both original gels.
