# Supplementary material for: Obligate sexual reproduction of a homothallic fungus closely related to the Cryptococcus pathogenic species complex
Source: eLife journal article supplement (doi:10.7554/elife.79114), 2022-06-16
Supplement: fig4-data1 [file Figure4–source data_1.pdf › Figure4–source data_1.pdf]

► PCR validations of *C. neoformans*  $MF_{\alpha_{Cd}}$  transformants

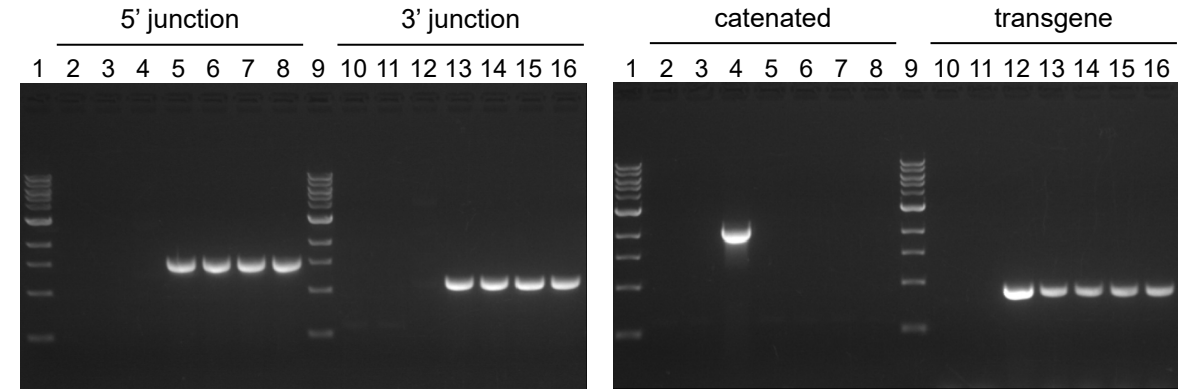

(File: MFalpha\_Cdep\_PC Rs\_01.jpg)

Note: the 5' junction and 3' junction PCRs detect the junctions between pAP1 and the safe haven insertion site.

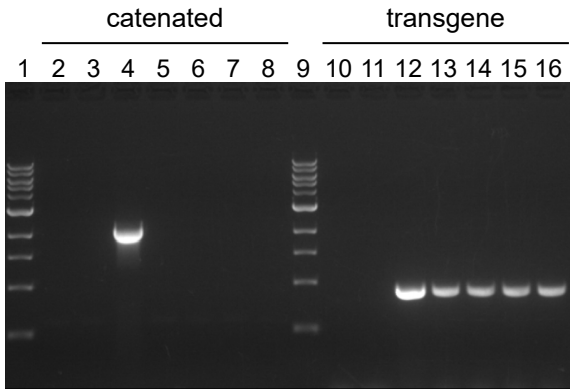

(File: MFalpha\_Cdep\_PC Rs\_02.jpg)

Note: The catenated plasmid PCR uses the 5' junction reverse primer paired with the 3' junction forward primer to detect tandem insertions. Only the plasmid (still circular) yielded a product. The pheromone transgene PCR is specific for  $MF_{\alpha_{Cd}}$ .

- 1 - Ladder
- 2 - YPH570 (KN99a *crg1* $\Delta$ ::*NAT*; parent of transformants ARP173 and ARP174)
- 3 - H99 *crg1* (F99 $\alpha$  *crg1* $\Delta$ ::*URA5*; parent of transformants ARP242 and ARP243)
- 4 - pAP1 (plasmid to express  $MF_{\alpha_{Cd}}$  integrated at the safe haven locus)
- 5 - ARP173 (KN99a *crg1* $\Delta$ ::*NAT*  $MF_{\alpha_{Cd}}$  NEO #1)
- 6 - ARP174 (KN99a *crg1* $\Delta$ ::*NAT*  $MF_{\alpha_{Cd}}$  NEO #2)
- 7 - ARP242 (F99 *crg1* $\Delta$ ::*URA5*  $MF_{\alpha_{Cd}}$  # 1)
- 8 - ARP243 (F99 *crg1* $\Delta$ ::*URA5*  $MF_{\alpha_{Cd}}$  # 2)
- 9-16 - same order as before

► PCR to identify which transformants have *STE3* deleted and which ones have ectopic insertion of the *HPH* (*HYG*) marker gene.

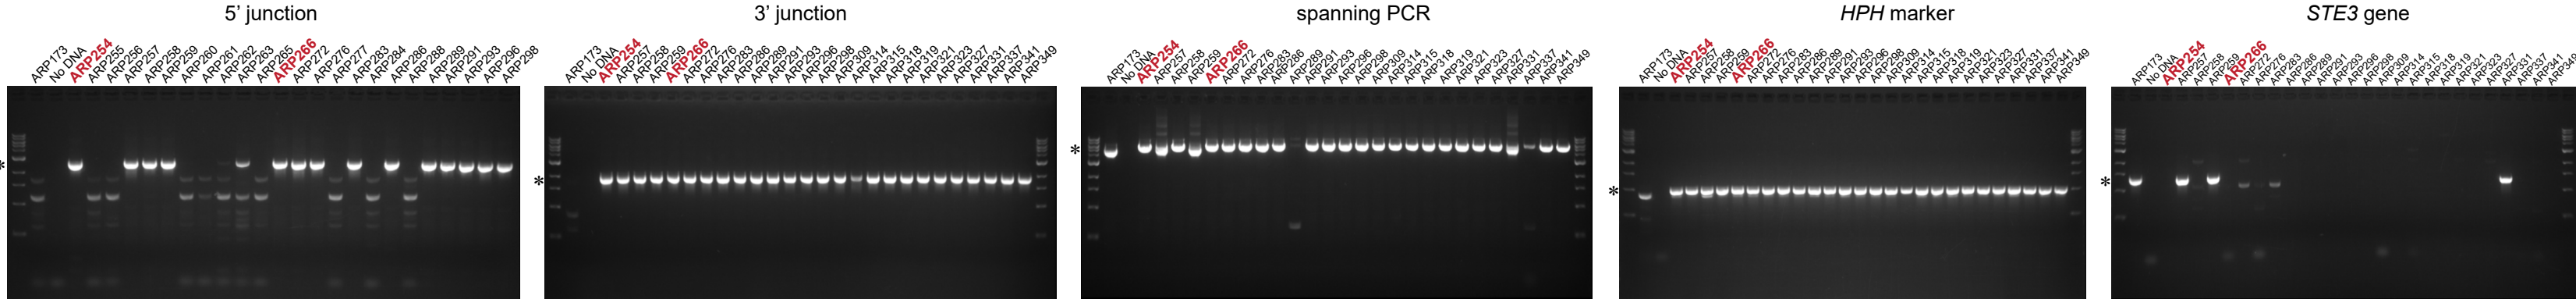

(File: CnSTE3del\_5junction.jpg)

Note: correct *ste3* $\Delta$  transformants selected for further experiments (ARP254 and ARP266) are marked in red; expected band sizes in each gel are marked with an asterisk

ARP254 - KN99a *crg1* $\Delta$ ::*NAT*  $MF_{\alpha_{Cd}}$  NEO *ste3* $\Delta$ ::*HYG* 1.1  
ARP266 - KN99a *crg1* $\Delta$ ::*NAT*  $MF_{\alpha_{Cd}}$  NEO *ste3* $\Delta$ ::*HYG* 2.6

► PCR to identify which transformants have *STE6* deleted and which ones have ectopic insertion of the *HPH* (*HYG*) marker gene.

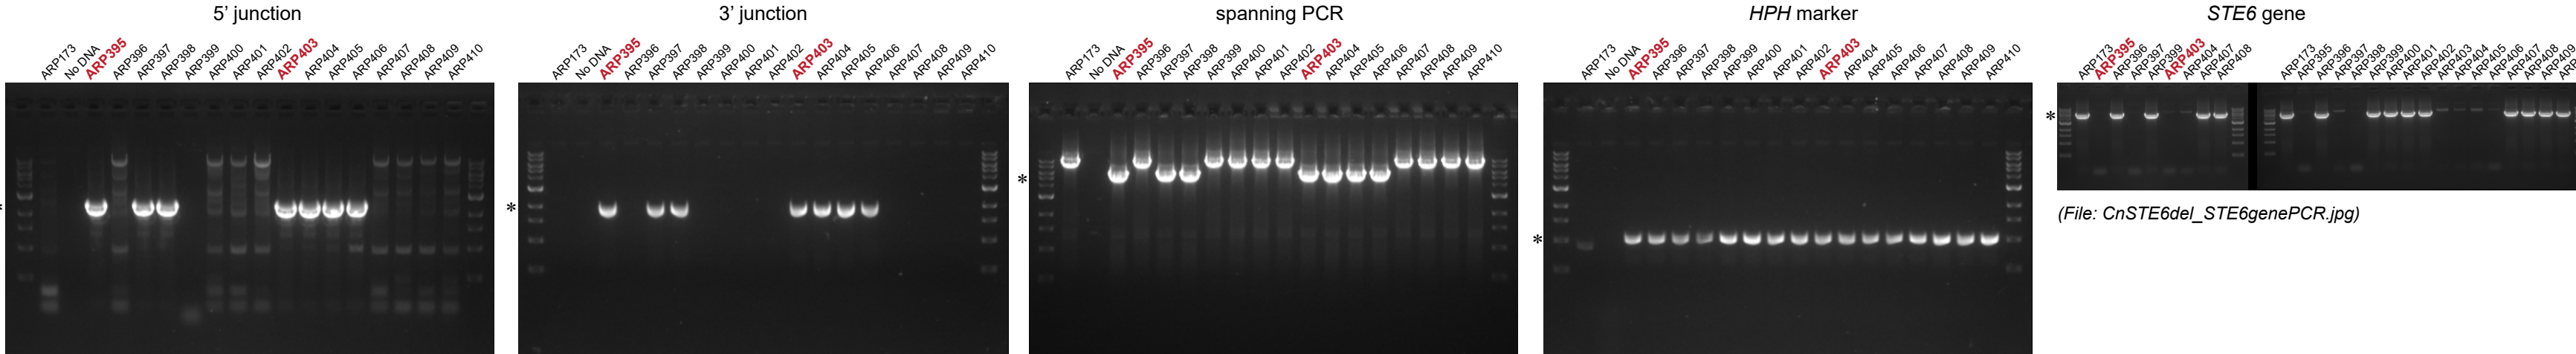

(File: CnSTE6del\_5junction.jpg)

Note: correct *ste6* $\Delta$  transformants selected for further experiments (ARP395 and ARP403) are marked in red; expected band sizes in each gel are marked with an asterisk

ARP395 - KN99a *crg1* $\Delta$ ::*NAT*  $MF_{\alpha_{Cd}}$  NEO *ste6* $\Delta$ ::*HYG* 1.1  
ARP403 - KN99a *crg1* $\Delta$ ::*NAT*  $MF_{\alpha_{Cd}}$  NEO *ste6* $\Delta$ ::*HYG* 2.1
