# Supplementary material for: Obligate sexual reproduction of a homothallic fungus closely related to the Cryptococcus pathogenic species complex
Source: eLife journal article supplement (doi:10.7554/elife.79114), 2022-06-16
Supplement: fig5-data1 [file elife-79114-fig5-data1-v2.pdf]

**Figure 5–source data 1.** Frequency of basidia defective in sporulation (bald basidia) and basidia with spores in *C. depauperatus* wild-type (CBS7841) and mutant strains, and one-way ANOVA and Tukey's HSD post hoc statistical tests for frequencies of bald basidia.

| Strain  | Genotype                                 | Areas surveyed | Bald basidia | Basidia w/ spores | Total basidia | Frequency of bald basidia (%) | Frequency of basidia with spores (%) |
|---------|------------------------------------------|----------------|--------------|-------------------|---------------|-------------------------------|--------------------------------------|
| CBS7841 | WT                                       | 1              | 0            | 25                | 25            | 0                             | 100                                  |
|         |                                          | 2              | 1            | 35                | 36            | 2.78                          | 97.22                                |
|         |                                          | 3              | 1            | 38                | 39            | 2.56                          | 97.44                                |
| SEC831  | <i>mfa</i> $\Delta$                      | 1              | 16           | 3                 | 19            | 84.21                         | 15.79                                |
|         |                                          | 2              | 15           | 3                 | 18            | 83.33                         | 16.67                                |
|         |                                          | 3              | 11           | 0                 | 11            | 100                           | 0                                    |
|         |                                          | 4              | 10           | 0                 | 10            | 100                           | 0                                    |
|         |                                          | 5              | 15           | 0                 | 15            | 100                           | 0                                    |
|         |                                          | 6              | 18           | 0                 | 18            | 100                           | 0                                    |
| SEC836  | <i>ste3</i> $\Delta$                     | 1              | 18           | 0                 | 18            | 100                           | 0                                    |
|         |                                          | 2              | 5            | 0                 | 5             | 100                           | 0                                    |
|         |                                          | 3              | 17           | 0                 | 17            | 100                           | 0                                    |
|         |                                          | 4              | 16           | 0                 | 16            | 100                           | 0                                    |
|         |                                          | 5              | 17           | 5                 | 22            | 77.27                         | 22.73                                |
| SEC866  | <i>dmc1</i> $\Delta$                     | 1              | 39           | 0                 | 39            | 100                           | 0                                    |
|         |                                          | 2              | 42           | 0                 | 42            | 100                           | 0                                    |
|         |                                          | 3              | 19           | 0                 | 19            | 100                           | 0                                    |
| #B6.1   | <i>mfa</i> $\Delta$ <i>ste3</i> $\Delta$ | 1              | 11           | 0                 | 11            | 100                           | 0                                    |
|         |                                          | 2              | 23           | 0                 | 23            | 100                           | 0                                    |
|         |                                          | 3              | 29           | 0                 | 29            | 100                           | 0                                    |
|         |                                          | 4              | 5            | 0                 | 5             | 100                           | 0                                    |
|         |                                          | 5              | 32           | 0                 | 32            | 100                           | 0                                    |

### One-way ANOVA

| Source     | Degrees of freedom | Sum of Squares | Mean Square | F Ratio  | p-value   |
|------------|--------------------|----------------|-------------|----------|-----------|
| Cross type | 4                  | 23656.868      | 5914.22     | 130.6550 | <.0001*** |
| Residuals  | 17                 | 769.520        | 45.27       |          |           |

### Tukey's HSD

| Level                                          | - Level                                        | Difference | 95% Confidence interval |          | p-Value |
|------------------------------------------------|------------------------------------------------|------------|-------------------------|----------|---------|
|                                                |                                                |            | Lower                   | Upper    |         |
| CBS7841                                        | <i>dmc1</i> $\Delta$                           | 98.21937   | 81.5059                 | 114.9329 | <.0001* |
| CBS7841                                        | <i>mfa</i> $\Delta$ <i>ste3</i> $\Delta$ #B6.1 | 98.21937   | 83.2704                 | 113.1684 | <.0001* |
| CBS7841                                        | <i>ste3</i> $\Delta$                           | 93.67392   | 78.7249                 | 108.6229 | <.0001* |
| CBS7841                                        | <i>mfa</i> $\Delta$                            | 92.81002   | 78.3357                 | 107.2843 | <.0001* |
| <i>mfa</i> $\Delta$                            | <i>dmc1</i> $\Delta$                           | 5.40936    | -9.0650                 | 19.8837  | 0.7852  |
| <i>mfa</i> $\Delta$                            | <i>mfa</i> $\Delta$ <i>ste3</i> $\Delta$ #B6.1 | 5.40936    | -6.9857                 | 17.8044  | 0.6786  |
| <i>ste3</i> $\Delta$                           | <i>dmc1</i> $\Delta$                           | 4.54545    | -10.4036                | 19.4945  | 0.8833  |
| <i>ste3</i> $\Delta$                           | <i>mfa</i> $\Delta$ <i>ste3</i> $\Delta$ #B6.1 | 4.54545    | -8.4008                 | 17.4917  | 0.8199  |
| <i>mfa</i> $\Delta$                            | <i>ste3</i> $\Delta$                           | 0.86390    | -11.5312                | 13.2590  | 0.9995  |
| <i>mfa</i> $\Delta$ <i>ste3</i> $\Delta$ #B6.1 | <i>dmc1</i> $\Delta$                           | 0.00000    | -14.9490                | 14.9490  | 1.0000  |
