# Supplementary material for: Obligate sexual reproduction of a homothallic fungus closely related to the Cryptococcus pathogenic species complex
Source: eLife. 2022 Jun 17;11:e79114. doi: 10.7554/eLife.79114 (PMC9296135; doi:10.7554/eLife.79114)
Supplement: Figure 3—source data 2. [file elife-79114-fig3-data2.xlsx]

## Sheet: CBS7841_expression
Figure 3–source data 2. C. depauperatus gene expression analysis comparing sporulation (solid) vs. non-sporulation (liquid) conditions.
Cryptococcus depauperatus CBS7841
locus_tag	DESeq2 base Mean	DESeq2_log2 FC (solid_vs_liquid)	DESeq2_padj	LOX_log2FC (solid_vs_liquid)	LOX_P (solid>liquid)	LOX_P (liquid>solid)
L203_100001-t1	10687.7	-0.364945	0.392822	-0.0743136	0	1
L203_100002-t1	36.2032	-1.9097	0.11112	-1.24582	0	1
L203_100003-t1	260.954	-0.227951	0.679323	0.136992	0.966	0.034
L203_100004-t1	5790.21	0.234026	0.653436	0.729522	1	0
L203_100005-t1	5383.94	0.65001	0.0502312	1.06338	1	0
L203_100006-t1	7346.27	-0.332277	0.241644	0.0510379	1	0
L203_100007-t1	5408.96	0.425475	0.336465	0.709105	1	0
L203_100008-t1	18396.6	-1.95107	7.77672e-13	-1.54027	0	1
L203_100009-t1	10243.5	-1.76158	1.89482e-06	-1.39406	0	1
L203_100010-t1	25787.6	0.210624	0.73271	0.430917	1	0
L203_100011-t1	2953.31	-1.66154	0.000363475	-1.10798	0	1
L203_100012-t1	33045	0.443216	0.550042	0.611257	1	0
L203_100013-t1	577.651	-0.257639	0.505094	0.145064	0.999	0.001
L203_100014-t1	3922.94	-0.102102	0.817858	0.285473	1	0
L203_100015-t1	1921.42	-0.374902	0.314128	-0.0611541	0.012	0.988
L203_100016-t1	146.685	1.62435	1.56179e-05	1.99375	1	0
L203_100017-t1	2064.96	-0.0583439	0.94118	0.257819	1	0
L203_100018-t1	9712.55	-0.632547	0.132021	-0.168129	0	1
L203_100019-t1	4541.6	-0.192458	0.674964	0.136756	1	0
L203_100020-t1	2730.29	-0.151093	0.74576	0.318739	1	0
L203_100021-t1	2286.73	0.397528	0.265845	0.752526	1	0
L203_100022-t1	3578.69	0.483391	0.120327	0.821008	1	0
L203_100023-t1	1041.21	0.0662695	0.871828	0.430639	1	0
L203_100024-t1	368.586	0.583342	0.267713	0.862725	1	0
L203_100025-t1	2437.5	0.531994	0.238974	0.973442	1	0
L203_100026-t1	3516.62	-0.368605	0.227364	0.0339762	0.962	0.038
L203_100027-t1	88.6168	0.463295	0.472204	0.775135	1	0
L203_100028-t1	115.228	1.53798	0.00129432	1.84459	1	0
L203_100029-t1	2504.53	-0.1166	0.887637	0.202336	1	0
L203_100030-t1	6558.55	0.210677	0.717806	0.648097	1	0
L203_100031-t1	3603.81	0.0728416	0.851904	0.446129	1	0
L203_100032-t1	2634.09	-0.771041	0.0485236	-0.435565	0	1
L203_100033-t1	53.3151	1.08639	0.228621	1.26161	1	0
L203_100034-t1	2667.14	1.32475	0.00379878	1.61306	1	0
L203_100035-t1	1406.51	0.859401	0.0125174	1.2851	1	0
L203_100036-t1	3532.45	0.476525	0.109942	0.837693	1	0
L203_100037-t1	1685.2	0.0320125	0.937885	0.399007	1	0
L203_100038-t1	3046.05	-0.0928224	0.844907	0.383906	1	0
L203_100039-t1	7539.24	0.154089	0.859246	0.528811	1	0
L203_100040-t1	1257.7	-1.81474	1.22289e-10	-1.4091	0	1
L203_100041-t1	115503	-0.591264	0.201805	-0.0968421	0	1
L203_100042-t1	9368.28	0.31422	0.521797	0.568314	1	0
L203_100043-t1	5492.53	0.253362	0.485152	0.624344	1	0
L203_100044-t1	7255.65	0.497118	0.109658	0.85283	1	0
L203_100045-t1	49827.8	-2.77543	3.30073e-27	-2.3834	0	1
L203_100046-t1	1705.48	0.48981	0.315221	0.751515	1	0
L203_100047-t1	5638.98	-1.12429	0.0406581	-0.836514	0	1
L203_100048-t1	9529.58	-0.418324	0.350892	0.088128	1	0
L203_100049-t1	1298.58	0.134966	0.726414	0.484118	1	0
L203_100050-t1	2177.46	0.608033	0.247805	1.12826	1	0
L203_100051-t1	1702.54	0.724663	0.017776	1.07697	1	0
L203_100052-t1	518.152	-0.343492	0.7549	0.425953	1	0
L203_100053-t1	9991.52	0.277791	0.653933	0.869003	1	0
L203_100054-t1	7992.02	-1.02906	0.115723	-0.3466	0	1
L203_100055-t1	20781.8	-2.28186	1.36485e-05	-1.69216	0	1
L203_100056-t1	40905.2	-4.24379	2.6436e-11	-3.48129	0	1
L203_100057-t1	1897.97	-0.338258	0.34402	-0.0120823	0.307	0.693
L203_100058-t1	5671.02	-0.782778	0.0335653	-0.366286	0	1
L203_100059-t1	1487.28	-0.0660391	0.882138	0.37709	1	0
L203_100060-t1	7186.87	-0.452196	0.566819	-0.244035	0	1
L203_100061-t1	4627.71	-0.107159	0.776035	0.236082	1	0
L203_100062-t1	5489.51	-1.13693	0.10845	-0.44723	0	1
L203_100063-t1	3860.58	-0.0350692	0.948834	0.267763	1	0
L203_100064-t1	1326.53	0.358757	0.263888	0.77	1	0
L203_100065-t1	1408.26	0.311689	0.679084	0.666357	1	0
L203_100066-t1	2838.11	1.97692	9.15396e-07	2.45449	1	0
L203_100068-t1	6013.44	-1.13059	0.133898	-0.447167	0	1
L203_100069-t1	9887.19	-1.85287	0.000350908	-1.23222	0	1
L203_100070-t1	6716.38	0.483917	0.149015	0.800778	1	0
L203_100071-t1	3920.78	0.473238	0.122469	0.845968	1	0
L203_100072-t1	939.08	-0.316384	0.754606	-0.108304	0.002	0.998
L203_100073-t1	1674.5	-0.170766	0.75183	0.101435	0.999	0.001
L203_100074-t1	1582.15	-0.336738	0.568669	-0.0422661	0.069	0.931
L203_100075-t1	2656.46	0.195235	0.735696	0.434113	1	0
L203_100076-t1	186.219	2.1195	4.99999e-08	2.50517	1	0
L203_100077-t1	129.234	-0.169032	0.802683	0.231371	0.993	0.007
L203_100078-t1	4855.95	-1.05013	0.00600187	-0.601116	0	1
L203_100079-t1	4190.12	-0.457303	0.22399	-0.0631992	0.001	0.999
L203_100080-t1	4276.31	-0.206836	0.65179	0.275245	1	0
L203_100081-t1	1157.82	0.302305	0.650532	0.539462	1	0
L203_100082-t1	1655.39	-0.441483	0.414761	-0.206043	0	1
L203_100083-t1	1756.68	0.130205	0.775943	0.573336	1	0
L203_100084-t1	14213.9	-0.167229	0.747046	0.246213	1	0
L203_100085-t1	1589.67	0.366776	0.414865	0.843743	1	0
L203_100086-t1	2672.87	0.657177	0.0552493	1.08888	1	0
L203_100087-t1	963.274	0.328562	0.518178	0.585905	1	0
L203_100088-t1	1168.19	0.498222	0.35497	0.833303	1	0
L203_100089-t1	3450.94	-0.136057	0.73384	0.297696	1	0
L203_100090-t1	1113.97	-0.380567	0.218604	0.024887	0.766	0.234
L203_100091-t1	7749.25	0.906319	0.0706857	1.28962	1	0
L203_100092-t1	3913.29	-0.775974	0.0611205	-0.50341	0	1
L203_100093-t1	623.854	1.03637	0.000745012	1.37134	1	0
L203_100094-t1	931.949	0.931589	0.0397473	1.29792	1	0
L203_100095-t1	4181.85	0.833096	0.0446652	1.09928	1	0
L203_100096-t1	762.249	-0.144272	0.868167	0.309968	1	0
L203_100097-t1	5603.19	0.0917435	0.83306	0.492089	1	0
L203_100098-t1	5900.08	0.541166	0.211704	0.896683	1	0
L203_100099-t1	3406.05	0.706624	0.156187	0.975417	1	0
L203_100100-t1	3575.98	-0.341354	0.288631	0.00452297	0.619	0.381
L203_100101-t1	2427.97	-0.0641686	0.943326	0.269608	1	0
L203_100102-t1	7604.35	0.0950428	0.879301	0.331694	1	0
L203_100103-t1	4793.98	-0.851248	0.000820986	-0.484159	0	1
L203_100104-t1	2631.85	-0.236307	0.616533	0.230006	1	0
L203_100105-t1	893.523	1.63912	0.00689819	1.81755	1	0
L203_100106-t1	10713.4	0.245833	0.72109	0.754221	1	0
L203_100107-t1	3481.22	-0.293576	0.541244	0.103652	1	0
L203_100108-t1	7276.12	0.192775	0.563228	0.596439	1	0
L203_100109-t1	4214.86	0.0976964	0.810681	0.423643	1	0
L203_100110-t1	18623.8	-1.09925	0.0262755	-0.514501	0	1
L203_100111-t1	588.344	0.882889	0.0804922	1.13005	1	0
L203_100112-t1	1032.41	-1.5186	0.00470331	-1.16137	0	1
L203_100113-t1	2551.37	-0.523028	0.343005	-0.193646	0	1
L203_100114-t1	3626.57	-0.506356	0.310035	0.0199011	0.812	0.188
L203_100115-t1	13651.8	1.55558	7.84861e-08	1.88229	1	0
L203_100116-t1	2098.21	-0.516521	0.106244	-0.130074	0	1
L203_100117-t1	2405.36	-0.124147	0.798435	0.273217	1	0
L203_100118-t1	1577.89	0.702404	0.185394	1.05789	1	0
L203_100119-t1	1320.55	0.667519	0.154095	0.933875	1	0
L203_100120-t1	602.122	-0.251212	0.497635	0.110189	0.988	0.012
L203_100121-t1	7199.09	-0.329168	0.599664	0.274673	1	0
L203_100122-t1	198.827	1.08924	0.269434	1.41666	1	0
L203_100123-t1	489.498	0.0299022	0.968518	0.424406	1	0
L203_100124-t1	1007.44	-0.783295	0.0508656	-0.477833	0	1
L203_100125-t1	6266.58	-0.497269	0.287159	0.0327215	0.988	0.012
L203_100126-t1	643.542	0.850426	0.0414557	1.23868	1	0
L203_100127-t1	6512.63	-0.315295	0.354655	0.124328	1	0
L203_100128-t1	3908.76	0.963528	0.0674836	1.16507	1	0
L203_100129-t1	1073.02	-0.484739	0.25186	-0.0274938	0.243	0.757
L203_100130-t1	9840.34	-0.254678	0.72728	0.218521	1	0
L203_100131-t1	1815.06	-0.00293283	0.994363	0.301787	1	0
L203_100132-t1	4786.48	-0.311664	0.573651	-0.0800982	0	1
L203_100133-t1	3304.93	0.616945	0.191893	0.87275	1	0
L203_100134-t1	945.021	0.370086	0.512278	0.864026	1	0
L203_100135-t1	26.7353	-0.71974	0.5857	-0.262866	0.114	0.886
L203_100136-t1	2323.72	0.558536	0.257472	0.898944	1	0
L203_100137-t1	1781.24	1.16143	0.0025986	1.64446	1	0
L203_100138-t1	15319.3	0.410659	0.25452	0.856205	1	0
L203_100139-t1	886.153	0.689349	0.113148	0.97497	1	0
L203_100140-t1	2481.46	0.350185	0.410546	0.635903	1	0
L203_100141-t1	7761.99	0.198902	0.726869	0.435863	1	0
L203_100142-t1	5172.11	0.5961	0.183466	0.856069	1	0
L203_100145-t1	5152.32	-0.143386	0.80808	0.165803	1	0
L203_100146-t1	687.405	1.24054	0.00402259	1.51552	1	0
L203_100147-t1	923.483	1.11027	0.0264235	1.34112	1	0
L203_100148-t1	14115.7	2.8416	6.67e-16	3.13266	1	0
L203_100150-t1	5069.55	0.0156237	0.977766	0.519371	1	0
L203_100152-t1	2364.87	0.122098	0.828507	0.464051	1	0
L203_100153-t1	30452.6	0.265541	0.762124	0.420369	1	0
L203_100154-t1	54174	-1.87	3.32896e-06	-1.34953	0	1
L203_100155-t1	822.792	0.775207	0.161879	1.19506	1	0
L203_100156-t1	17423.8	0.455795	0.556947	0.626626	1	0
L203_100157-t1	19438.4	-1.54386	1.30002e-06	-1.06949	0	1
L203_100158-t1	9216.52	-0.455112	0.202264	-0.143642	0	1
L203_100159-t1	8454.28	-0.834832	0.133768	-0.22409	0	1
L203_100160-t1	3216.09	-0.0476069	0.90987	0.296522	1	0
L203_100161-t1	22.6741	-0.864015	0.470538	-0.240717	0.174	0.826
L203_100162-t1	8720.18	0.29376	0.516964	0.778133	1	0
L203_100163-t1	4488.4	0.632477	0.0608415	1.08613	1	0
L203_100164-t1	16112.5	-0.542679	0.406818	-0.274029	0	1
L203_100165-t1	4370.26	-0.194529	0.738289	0.194049	1	0
L203_100166-t1	4322.79	0.530903	0.280732	0.970095	1	0
L203_100167-t1	11322.9	0.327017	0.37494	0.65115	1	0
L203_100168-t1	1072.25	-0.0214049	0.966564	0.39927	1	0
L203_100169-t1	833.233	0.502948	0.336886	0.733927	1	0
L203_100170-t1	28566.9	0.817231	0.25807	0.947569	1	0
L203_100171-t1	193.195	0.456112	0.400138	0.795626	1	0
L203_100172-t1	7615.45	1.96896	0.00539784	2.09922	1	0
L203_100173-t1	2790.16	0.0180383	0.964025	0.404075	1	0
L203_100174-t1	5060	1.05371	0.0043692	1.33558	1	0
L203_100175-t1	2824.9	-0.964762	0.0633256	-0.5655	0	1
L203_100176-t1	195.244	-0.522759	0.324241	-0.208455	0.007	0.993
L203_100177-t1	10105.1	-1.43221	0.000254308	-0.922335	0	1
L203_100179-t1	8209.11	0.185441	0.689364	0.645324	1	0
L203_100180-t1	3704.37	-1.79371	0.00778438	-1.05834	0	1
L203_100181-t1	3090.53	-0.089118	0.862306	0.189831	1	0
L203_100182-t1	1307.83	-0.62088	0.304579	-0.336546	0	1
L203_100183-t1	29659.1	0.0139271	0.986605	0.160326	1	0
L203_100184-t1	14616.3	-0.371242	0.632917	-0.138238	0	1
L203_100185-t1	3283.83	-0.496221	0.353359	0.0555011	0.995	0.005
L203_100186-t1	5832.31	0.214403	0.700807	0.724519	1	0
L203_100187-t1	2950.39	0.00993221	0.986043	0.434006	1	0
L203_100188-t1	1408.32	0.581928	0.211394	0.872545	1	0
L203_100189-t1	6987.82	-0.162355	0.793144	0.403137	1	0
L203_100190-t1	2055.3	-0.787617	0.0170964	-0.339787	0	1
L203_100191-t1	1003.09	0.984775	0.000523017	1.34697	1	0
L203_100192-t1	20699.3	-1.75548	9.38789e-06	-1.3019	0	1
L203_100193-t1	4800.83	0.168284	0.665593	0.584635	1	0
L203_100194-t1	4280.41	0.372125	0.436321	0.657978	1	0
L203_100195-t1	2408.53	0.67323	0.040176	0.988746	1	0
L203_100196-t1	3343.54	-1.73563	6.57176e-06	-1.41594	0	1
L203_100197-t1	2742.67	-0.246078	0.593269	0.0591199	0.995	0.005
L203_100198-t1	2639.86	0.444946	0.295028	0.909212	1	0
L203_100199-t1	4895.69	-0.215808	0.648245	0.283092	1	0
L203_100200-t1	4272.55	1.31642	0.0177971	1.69473	1	0
L203_100201-t1	4757.24	-0.953194	0.0128145	-0.536431	0	1
L203_100202-t1	225.783	1.05026	0.236039	1.83538	1	0
L203_100203-t1	2487.17	0.197371	0.673667	0.511316	1	0
L203_100204-t1	89.8718	0.461541	0.489642	0.90962	1	0
L203_100205-t1	5499.87	1.22749	0.024687	1.42162	1	0
L203_100206-t1	6949.54	0.250361	0.651891	0.709017	1	0
L203_100207-t1	5379.17	-0.4838	0.121656	-0.149155	0	1
L203_100208-t1	1381.44	0.554237	0.207596	0.820044	1	0
L203_100209-t1	3143.15	0.970125	0.0451021	1.21556	1	0
L203_100210-t1	3576.46	-0.502147	0.412505	0.0835334	1	0
L203_100211-t1	4131.6	-0.709925	0.273807	-0.0785962	0	1
L203_100212-t1	2740.12	-1.53081	5.57614e-07	-1.1069	0	1
L203_100213-t1	22453.1	-0.0141705	0.983481	0.204955	1	0
L203_100214-t1	9419.52	0.042166	0.91113	0.404598	1	0
L203_100215-t1	17198.1	-0.650247	0.137934	-0.212196	0	1
L203_100216-t1	3227.95	-0.742514	0.137591	-0.274232	0	1
L203_100217-t1	2880.07	-0.295339	0.607822	-0.00376053	0.422	0.578
L203_100218-t1	7160.58	0.0387279	0.948834	0.290672	1	0
L203_100219-t1	9660.85	0.305603	0.390282	0.714285	1	0
L203_100220-t1	3562.1	0.067665	0.876887	0.481061	1	0
L203_100221-t1	635.211	0.335501	0.72728	1.11451	1	0
L203_100222-t1	1023.62	-0.450545	0.410257	0.0710762	0.968	0.032
L203_100223-t1	2889.15	0.259761	0.611736	0.581804	1	0
L203_100224-t1	10200.3	-1.05551	3.26292e-05	-0.653803	0	1
L203_100225-t1	1559.16	-0.788601	0.102618	-0.345362	0	1
L203_100226-t1	3062.69	0.00822474	0.986043	0.369584	1	0
L203_100227-t1	3105.65	0.0734781	0.897037	0.509199	1	0
L203_100228-t1	4854.9	-0.443731	0.10965	-0.0555566	0	1
L203_100229-t1	526.044	2.68291	4.91427e-13	3.13415	1	0
L203_100230-t1	14096.2	1.06026	0.02062	1.55839	1	0
L203_100231-t1	35332.5	0.328712	0.607822	0.535824	1	0
L203_100232-t1	2240.14	0.235393	0.6734	0.55814	1	0
L203_100233-t1	2220.4	0.0905254	0.812541	0.432949	1	0
L203_100234-t1	3899.04	0.836565	0.00402259	1.17319	1	0
L203_100235-t1	7043.18	-0.161476	0.709421	0.278972	1	0
L203_100236-t1	37936.6	0.0704474	0.919674	0.537644	1	0
L203_100237-t1	270288	-0.97248	0.000283398	-0.547598	0	1
L203_100238-t1	4972.76	-0.235934	0.516263	0.190691	1	0
L203_100239-t1	10931.2	0.540542	0.294613	0.77126	1	0
L203_100240-t1	2689.25	0.383725	0.398068	0.714373	1	0
L203_100241-t1	4518.72	0.00653309	0.990697	0.526049	1	0
L203_100242-t1	991.659	0.124821	0.798305	0.509544	1	0
L203_100243-t1	845.959	-0.943097	0.338748	-0.453765	0	1
L203_100244-t1	5326.34	-0.0949693	0.802683	0.250416	1	0
L203_100245-t1	827.185	0.95425	0.112243	1.57744	1	0
L203_100246-t1	2744.15	-0.834515	0.0508656	-0.434337	0	1
L203_100247-t1	2807.04	-1.19267	0.0063595	-0.669054	0	1
L203_100248-t1	3475.2	0.503139	0.0708459	0.890836	1	0
L203_100249-t1	429.301	-0.650456	0.200765	-0.169951	0.002	0.998
L203_100250-t1	4303.33	-1.29802	0.000116347	-0.919111	0	1
L203_100251-t1	2020.18	0.585167	0.26984	0.847973	1	0
L203_100252-t1	4936.2	0.175698	0.734541	0.557533	1	0
L203_100253-t1	11810.5	-0.797715	0.0125038	-0.365301	0	1
L203_100254-t1	7010.39	-0.872393	0.0192969	-0.393965	0	1
L203_100255-t1	11662.6	-0.6779	0.179545	-0.291851	0	1
L203_100256-t1	2569.32	0.0705827	0.929551	0.438367	1	0
L203_100257-t1	4898.91	-0.679599	0.392618	-0.37342	0	1
L203_100258-t1	355.005	-1.93659	0.0063827	-1.44477	0	1
L203_100259-t1	1790.7	-1.51186	0.00224689	-1.1268	0	1
L203_100260-t1	702.627	-1.59275	0.000232441	-1.06992	0	1
L203_100261-t1	7590.87	-0.476399	0.351737	-0.238004	0	1
L203_100262-t1	10621.5	-0.823338	0.121112	-0.233827	0	1
L203_100263-t1	11904.9	-0.325823	0.321014	0.101233	1	0
L203_100264-t1	5837.79	-0.51192	0.251339	-0.152067	0	1
L203_100265-t1	2120.61	-0.494714	0.275653	-0.0993895	0	1
L203_100266-t1	7079.72	1.34077	0.00378228	1.57335	1	0
L203_100267-t1	3712.67	0.427002	0.262569	0.875466	1	0
L203_100268-t1	1538.89	-0.581392	0.218061	-0.335883	0	1
L203_100269-t1	22101.4	-4.12992	3.90967e-10	-3.35156	0	1
L203_100270-t1	6107.12	-0.408298	0.599375	-0.134839	0	1
L203_100271-t1	813.26	1.34111	0.000476559	1.61855	1	0
L203_100272-t1	5725.43	-0.604359	0.224265	-0.147268	0	1
L203_100273-t1	11357.7	1.40946	0.0153843	1.88319	1	0
L203_100274-t1	1993.48	-0.808578	0.0640915	-0.456091	0	1
L203_100275-t1	1273.49	-0.946196	0.172559	-0.567331	0	1
L203_100276-t1	3012.73	0.856226	0.282217	0.99547	1	0
L203_100277-t1	7218.45	-1.33103	0.00144755	-0.955476	0	1
L203_100278-t1	133.331	-1.67931	0.0100998	-1.30031	0	1
L203_100279-t1	3578.05	0.826776	0.121112	1.25924	1	0
L203_100280-t1	7270.56	1.31196	0.0127296	1.66447	1	0
L203_100281-t1	1210.08	0.00500578	0.990697	0.35558	1	0
L203_100282-t1	14625.4	-1.47452	0.0051127	-1.03132	0	1
L203_100283-t1	1194.07	1.13869	0.00574207	1.46624	1	0
L203_100284-t1	761.879	0.4938	0.296715	0.767028	1	0
L203_100286-t1	22506.1	-0.0512546	0.963326	0.183124	1	0
L203_100287-t1	12291.5	-1.83966	1.4398e-09	-1.51409	0	1
L203_100288-t1	1391.18	0.157218	0.838213	0.463581	1	0
L203_100289-t1	1702.16	0.481768	0.302394	0.751729	1	0
L203_100290-t1	5744.71	-0.832395	0.0549072	-0.546759	0	1
L203_100291-t1	12004	-0.860252	0.15477	-0.316818	0	1
L203_100292-t1	1424.28	-3.14209	NA	-2.2688	0	1
L203_100293-t1	19442.7	0.499035	0.142915	0.840105	1	0
L203_100294-t1	3697.88	-1.2063	0.000413085	-0.785124	0	1
L203_100295-t1	17343.7	-1.18164	4.77644e-06	-0.828087	0	1
L203_100296-t1	8582.25	-0.307819	0.40333	0.0832066	1	0
L203_100297-t1	1218.61	0.0130792	0.982124	0.495787	1	0
L203_100298-t1	2459.97	0.7311	0.0842613	0.992892	1	0
L203_100299-t1	1874.57	-0.294188	0.611139	0.181637	1	0
L203_100300-t1	9602.63	-0.242316	0.679465	0.0155975	0.912	0.088
L203_100301-t1	8065.55	-0.508667	0.228699	-0.0715293	0	1
L203_100302-t1	932.455	0.977263	0.0425448	1.23926	1	0
L203_100305-t1	5696.43	-0.275223	0.5784	0.0503554	1	0
L203_100306-t1	48999.8	-0.052055	0.924513	0.338339	1	0
L203_100307-t1	7489.38	1.40645	0.000384174	1.67743	1	0
L203_100308-t1	6220.04	0.141259	0.760039	0.599518	1	0
L203_100309-t1	3575.45	0.23201	0.586339	0.681737	1	0
L203_100310-t1	5369.43	0.672076	0.0295737	1.02705	1	0
L203_100311-t1	3483.82	0.177778	0.725957	0.460239	1	0
L203_100312-t1	6814.73	-0.280491	0.651377	-0.0500071	0.001	0.999
L203_100313-t1	8307.54	-0.148887	0.72728	0.280184	1	0
L203_100314-t1	18079.8	-0.194742	0.527608	0.184737	1	0
L203_100315-t1	240778	-1.32768	6.60213e-07	-0.91458	0	1
L203_100316-t1	3160.05	0.428212	0.22495	0.869919	1	0
L203_100317-t1	4842.14	-0.585611	0.210735	-0.0591614	0	1
L203_100318-t1	9180.43	-0.286229	0.565715	0.049338	1	0
L203_100319-t1	12734.6	0.561831	0.0378889	0.927366	1	0
L203_100320-t1	1916.92	0.526301	0.241141	0.946409	1	0
L203_100321-t1	124.112	1.51869	0.00136835	1.95688	1	0
L203_100322-t1	2789.79	0.365178	0.293106	0.742412	1	0
L203_100323-t1	5132.8	-1.26085	0.000908018	-0.856069	0	1
L203_100324-t1	242882	-0.0383721	0.943643	0.246213	1	0
L203_100325-t1	8291.26	1.50128	0.0043692	1.75968	1	0
L203_100326-t1	2402.25	-0.0273562	0.953939	0.297191	1	0
L203_100327-t1	3338.29	0.422119	0.437899	0.674479	1	0
L203_100328-t1	2827.91	0.605441	0.0649823	0.983685	1	0
L203_100329-t1	1820.15	-1.00871	0.195999	-0.306776	0	1
L203_100330-t1	3237.05	0.247267	0.540483	0.696528	1	0
L203_100331-t1	2945.39	-0.909218	0.0529002	-0.603815	0	1
L203_100332-t1	3306.76	-0.665529	0.0759345	-0.210738	0	1
L203_100333-t1	1823.53	0.492946	0.211394	0.83131	1	0
L203_100334-t1	16234.4	-0.108691	0.848277	0.169258	1	0
L203_100335-t1	2844.31	-0.771772	0.0541238	-0.342691	0	1
L203_100336-t1	243287	-0.0434005	0.937879	0.240314	1	0
L203_100337-t1	3258.95	0.443475	0.306252	0.751806	1	0
L203_100338-t1	9384.63	-1.6221	0.000116281	-1.31675	0	1
L203_100339-t1	1903.4	0.0150538	0.977769	0.500517	1	0
L203_100340-t1	3059.04	0.809325	0.00246259	1.17973	1	0
L203_100341-t1	2374.42	-0.0271858	0.975807	0.53041	1	0
L203_100342-t1	145.441	1.41476	0.123918	1.7028	1	0
L203_100343-t1	2951.14	1.31076	0.0147796	1.59903	1	0
L203_100344-t1	712.305	-1.00677	0.00496506	-0.673502	0	1
L203_100345-t1	1452.54	-0.0527275	0.948925	0.301283	1	0
L203_100346-t1	2717.22	-0.728118	0.102572	-0.418633	0	1
L203_100347-t1	3199.92	0.870377	0.0732451	1.09576	1	0
L203_100348-t1	888.644	0.666779	0.111739	0.94185	1	0
L203_100349-t1	5604.93	-0.174567	0.747325	0.0757654	1	0
L203_100350-t1	2489.27	0.476526	0.102572	0.835496	1	0
L203_100351-t1	1988.19	-0.348803	0.568732	0.204354	1	0
L203_100352-t1	393.706	1.02209	0.0434887	1.40114	1	0
L203_100353-t1	2685.85	0.434001	0.37409	0.948877	1	0
L203_100354-t1	23703	0.283689	0.495819	0.691918	1	0
L203_100355-t1	7249.82	-0.0592208	0.877323	0.284597	1	0
L203_100356-t1	979.653	0.736326	0.133629	0.978745	1	0
L203_100357-t1	3501.89	1.97553	9.25072e-10	2.41049	1	0
L203_100358-t1	5058.91	0.975537	0.0140228	1.34274	1	0
L203_100359-t1	5050.61	1.26771	0.000964214	1.53842	1	0
L203_100360-t1	2107.6	-0.722406	0.176565	-0.46925	0	1
L203_100361-t1	5819.34	-0.614226	0.406818	0.0934655	1	0
L203_100362-t1	2847.04	-0.420135	0.660815	-0.189451	0	1
L203_100363-t1	919.334	0.515028	0.409252	0.71381	1	0
L203_100364-t1	2214.16	-0.258882	0.636695	0.122938	1	0
L203_100365-t1	1873.89	1.04154	0.0392541	1.30297	1	0
L203_100366-t1	1399.54	0.461098	0.215741	0.770931	1	0
L203_100367-t1	3669.49	-0.110014	0.832884	0.36717	1	0
L203_100368-t1	1581.13	-0.078989	0.861389	0.294112	1	0
L203_100369-t1	3777.71	0.283359	0.520681	0.759284	1	0
L203_100370-t1	22067.9	-1.72831	0.00242727	-1.11102	0	1
L203_100371-t1	4779.51	-0.329871	0.498867	0.154207	1	0
L203_100372-t1	6849.92	-0.68321	0.167784	-0.277044	0	1
L203_100373-t1	4859.33	-0.580207	0.214429	-0.0890099	0	1
L203_100374-t1	498.122	-0.362973	0.521893	0.0997799	0.976	0.024
L203_100375-t1	3707.58	-0.287008	0.414128	0.093452	1	0
L203_100376-t1	17221.9	-1.99542	2.65704e-07	-1.61523	0	1
L203_100377-t1	1733.1	-0.293138	0.68377	0.0919367	1	0
L203_100378-t1	2767.22	-0.2875	0.377762	0.0792655	1	0
L203_100379-t1	1575.44	0.997596	0.0168142	1.25636	1	0
L203_100380-t1	3160.54	1.28061	0.00209807	1.55604	1	0
L203_100381-t1	5959.44	-0.80932	0.0248502	-0.363911	0	1
L203_100382-t1	2273.21	-0.681935	0.133377	-0.16922	0	1
L203_100383-t1	2889.43	1.21215	0.000106102	1.54947	1	0
L203_100384-t1	2167.76	0.230821	0.662618	0.496963	1	0
L203_100385-t1	50818.1	0.882148	0.00556188	1.22408	1	0
L203_100386-t1	1705.95	-1.63741	3.56137e-09	-1.25414	0	1
L203_100387-t1	1640.93	0.30472	0.366777	0.644641	1	0
L203_100388-t1	1125.16	2.56685	3.45129e-05	2.72303	1	0
L203_100389-t1	2477.5	0.7318	0.0640915	1.04113	1	0
L203_100390-t1	5423.05	-1.07324	0.00020811	-0.681962	0	1
L203_100391-t1	718.518	-0.163634	0.70001	0.258036	1	0
L203_100392-t1	21706.4	0.616626	0.213112	0.860375	1	0
L203_100393-t1	5185.85	-0.130778	0.753017	0.213204	1	0
L203_100394-t1	11230.5	-0.163311	0.725425	0.237931	1	0
L203_100395-t1	9290.08	-2.08376	0.00016941	-1.44559	0	1
L203_100396-t1	4258.41	0.0617529	0.89242	0.507861	1	0
L203_100397-t1	13946.1	-0.261896	0.427535	0.0800846	1	0
L203_100398-t1	1990.23	-1.95797	1.21808e-12	-1.56257	0	1
L203_100399-t1	2325.36	-0.763914	0.0280303	-0.380818	0	1
L203_100400-t1	3623.82	-0.38879	0.295584	-0.0293327	0.05	0.95
L203_100401-t1	2408.11	-0.299577	0.600761	0.0544873	0.994	0.006
L203_100402-t1	29841.5	0.117959	0.83723	0.648613	1	0
L203_100403-t1	1452.11	0.744776	0.0143681	1.07819	1	0
L203_100404-t1	4602.64	-1.46191	9.18073e-06	-1.03519	0	1
L203_100405-t1	1031.68	-0.234979	0.649315	0.122858	0.999	0.001
L203_100406-t1	1349.12	-0.178808	0.650563	0.180046	1	0
L203_100407-t1	5383.95	0.358593	0.216843	0.731027	1	0
L203_100408-t1	1674.67	0.0086897	0.986605	0.335232	1	0
L203_100409-t1	961.107	1.02421	0.0483946	1.26563	1	0
L203_100410-t1	4168.89	0.529868	0.282217	0.805169	1	0
L203_100411-t1	820.719	1.30791	4.60232e-05	1.66948	1	0
L203_100412-t1	5558	0.981147	0.00585204	1.29845	1	0
L203_100413-t1	3137.49	0.560899	0.412985	0.742386	1	0
L203_100414-t1	3039.7	0.583027	0.113148	0.899934	1	0
L203_100415-t1	2842.53	1.08401	0.00799705	1.35615	1	0
L203_100416-t1	10066.2	1.86545	0.00031277	2.25207	1	0
L203_100417-t1	20482.4	-2.54115	2.06041e-07	-1.95882	0	1
L203_100418-t1	12074.5	0.839077	0.00850971	1.14852	1	0
L203_100419-t1	7496.4	-0.205955	0.594642	0.209129	1	0
L203_100420-t1	10805.3	-2.7744	1.98477e-10	-2.41859	0	1
L203_100421-t1	4917.43	-0.513924	0.149871	-0.113007	0	1
L203_100422-t1	4365.37	1.01433	0.0166654	1.41882	1	0
L203_100423-t1	1558.71	-0.591691	0.153948	-0.168116	0	1
L203_100424-t1	773.955	0.411452	0.375367	0.682142	1	0
L203_100425-t1	3454.84	3.69821	1.24256e-08	4.10242	1	0
L203_100426-t1	136.337	1.02084	0.0481504	1.30565	1	0
L203_100427-t1	1185.38	-1.52363	0.0941662	-0.741074	0	1
L203_100428-t1	1448.89	0.499979	0.214793	0.950998	1	0
L203_100429-t1	2567.94	1.20128	0.00016941	1.574	1	0
L203_100430-t1	1767.83	0.345351	0.377741	0.795601	1	0
L203_100431-t1	35607.4	-0.260107	0.53267	0.0727507	1	0
L203_100432-t1	1924.84	0.421427	0.24513	0.843903	1	0
L203_100433-t1	4491.31	0.199034	0.639039	0.615887	1	0
L203_100434-t1	1254.85	-0.10038	0.917577	0.456449	1	0
L203_100435-t1	9709.12	-1.0011	0.0058109	-0.632036	0	1
L203_100436-t1	33878.2	0.592091	0.298709	0.791481	1	0
L203_100437-t1	69696.6	-0.207437	0.755736	-0.0113954	0.002	0.998
L203_100438-t1	7524.84	0.78115	0.0160729	1.12919	1	0
L203_100439-t1	6452.93	0.126156	0.851528	0.441717	1	0
L203_100440-t1	5399.39	0.575915	0.186847	0.839613	1	0
L203_100441-t1	5505.99	-0.898199	0.00688172	-0.460197	0	1
L203_100442-t1	151.343	-0.395644	0.463363	-0.0864577	0.173	0.827
L203_100443-t1	1884.38	0.807539	0.0760342	1.33325	1	0
L203_100444-t1	10320.4	0.898987	0.0992978	1.13965	1	0
L203_100445-t1	4038.6	0.958698	0.0167226	1.29984	1	0
L203_100446-t1	2109.05	-0.379604	0.417048	0.113967	1	0
L203_100447-t1	2839.31	-0.966456	0.0314923	-0.578717	0	1
L203_100448-t1	5099.74	1.22938	8.15274e-05	1.56835	1	0
L203_100449-t1	1074.54	-0.0164889	0.975208	0.37041	1	0
L203_100450-t1	1272.87	-0.13652	0.807109	0.220961	1	0
L203_100451-t1	1282.37	-0.159536	0.741735	0.244851	1	0
L203_100452-t1	3595.19	1.03392	0.0890631	1.20833	1	0
L203_100453-t1	3088.11	-0.193758	0.722521	0.140347	1	0
L203_100454-t1	4532.35	0.0191863	0.965153	0.396434	1	0
L203_100455-t1	5169.05	0.472702	0.193949	0.836465	1	0
L203_100456-t1	1714.46	0.47493	0.301659	0.905258	1	0
L203_100457-t1	9260.86	-1.22226	0.0107459	-0.958368	0	1
L203_100458-t1	1451.13	1.39644	0.0042486	1.97464	1	0
L203_100459-t1	2502.69	-0.370086	0.544336	-0.144072	0	1
L203_100460-t1	2368.67	-1.78301	0.000188075	-1.45604	0	1
L203_100461-t1	5615.18	-0.329332	0.594234	0.266888	1	0
L203_100462-t1	1045.82	-0.572784	0.525922	0.191765	1	0
L203_100463-t1	518.538	-0.975339	0.0404882	-0.450897	0	1
L203_100464-t1	6530.65	-1.94532	7.29531e-05	-1.3399	0	1
L203_100465-t1	15565.1	-0.916284	0.035652	-0.477201	0	1
L203_100466-t1	1745.23	0.514484	0.274611	0.772156	1	0
L203_100467-t1	10098.4	-0.821337	0.0120854	-0.406428	0	1
L203_100468-t1	4179.2	0.64768	0.0246233	1.02285	1	0
L203_100469-t1	26129.8	-0.519487	0.495991	0.184052	1	0
L203_100470-t1	31907.8	-1.98207	3.09663e-15	-1.59861	0	1
L203_100471-t1	1096.22	-1.03852	0.00233135	-0.712965	0	1
L203_100472-t1	3949.05	0.613745	0.0334723	0.958976	1	0
L203_100473-t1	6611.41	-0.368944	0.378045	-0.0851935	0	1
L203_100474-t1	31206.7	0.694685	0.330452	0.832663	1	0
L203_100475-t1	2283.74	-0.264959	0.666574	0.0448977	0.961	0.039
L203_100476-t1	82.5209	0.846353	0.282217	1.05123	1	0
L203_100477-t1	4074.68	0.811773	0.239695	1.00755	1	0
L203_100478-t1	848.642	-2.09762	1.89964e-06	-1.57787	0	1
L203_100479-t1	6957.85	-1.13829	0.000374218	-0.728356	0	1
L203_100480-t1	4580.3	0.397886	0.291885	0.753673	1	0
L203_100481-t1	24213.6	-0.0508922	0.958842	0.128742	1	0
L203_100482-t1	1856.38	0.326204	0.628748	0.623914	1	0
L203_100483-t1	1940.11	0.581876	0.217325	0.860335	1	0
L203_100484-t1	16023.8	-0.655855	0.167143	-0.110804	0	1
L203_100485-t1	6158.35	-0.240955	0.678704	0.310724	1	0
L203_100486-t1	2042.07	-0.191507	0.712897	0.0873814	1	0
L203_100487-t1	2012.04	0.638167	0.231449	0.956042	1	0
L203_100488-t1	3176.28	0.113038	0.739595	0.511751	1	0
L203_100489-t1	2439.29	0.362044	0.212995	0.737687	1	0
L203_100490-t1	4808.96	0.437889	0.36923	0.702587	1	0
L203_100491-t1	7658.43	0.115488	0.779539	0.559247	1	0
L203_100492-t1	934.129	0.520924	0.537106	1.09158	1	0
L203_100493-t1	4493.97	0.430203	0.257196	0.839758	1	0
L203_100494-t1	8221.5	0.194433	0.757839	0.611626	1	0
L203_100495-t1	8739.41	-0.617402	0.179388	-0.358408	0	1
L203_100496-t1	4210.1	0.734073	0.0744568	1.00257	1	0
L203_100497-t1	337.221	0.865675	0.0146974	1.19365	1	0
L203_100498-t1	3727.46	-0.342889	0.459999	-0.0542095	0.002	0.998
L203_100499-t1	21548.8	-0.0244664	0.965153	0.249591	1	0
L203_100500-t1	7593.87	-0.300959	0.540686	0.105571	1	0
L203_100501-t1	3390.02	-2.40397	9.38789e-06	-1.76041	0	1
L203_100502-t1	3471.58	0.139615	0.72728	0.581014	1	0
L203_100503-t1	1605.84	-0.608577	0.0605326	-0.179855	0	1
L203_100504-t1	1721.37	0.269184	0.545327	0.64345	1	0
L203_100505-t1	4215.28	0.647139	0.123918	0.958442	1	0
L203_100506-t1	1183.73	0.48727	0.25186	0.884598	1	0
L203_100507-t1	7020.8	0.048603	0.929641	0.421511	1	0
L203_100508-t1	53479.8	1.19503	0.000631374	1.56865	1	0
L203_100509-t1	4893.76	-1.80129	0.0135239	-1.06058	0	1
L203_100510-t1	8033.67	-0.13203	0.771063	0.162416	1	0
L203_100511-t1	2708.65	-0.0508651	0.919071	0.240449	1	0
L203_100512-t1	5136.88	0.372379	0.296846	0.694024	1	0
L203_100513-t1	20789.4	-1.73405	3.31469e-08	-1.34552	0	1
L203_100514-t1	3649.52	0.432823	0.28707	0.77219	1	0
L203_100515-t1	3427.96	-1.09129	0.00079385	-0.748427	0	1
L203_100516-t1	3016.49	0.290477	0.375367	0.687885	1	0
L203_100517-t1	2677.81	-0.298664	0.513196	0.182438	1	0
L203_100518-t1	1716.11	-2.84193	1.48434e-07	-2.21558	0	1
L203_100519-t1	2500.32	-0.712858	0.33098	-0.0520402	0.021	0.979
L203_100520-t1	1601.55	-0.634075	0.392466	0.014141	0.684	0.316
L203_100521-t1	53389.7	-0.706312	0.340777	-0.033948	0	1
L203_100522-t1	2004.8	0.253566	0.555048	0.587922	1	0
L203_100523-t1	31895.7	0.778265	0.230593	1.30297	1	0
L203_100524-t1	4047.42	0.54689	0.0872795	0.966216	1	0
L203_100525-t1	2129.3	0.441408	0.313601	0.712561	1	0
L203_100526-t1	2182.59	0.172968	0.689537	0.485777	1	0
L203_100527-t1	6573.61	0.739296	0.0824711	1.19112	1	0
L203_100528-t1	6293.29	1.08597	1.21239e-05	1.46672	1	0
L203_100529-t1	10436.4	1.40493	0.000172743	1.69395	1	0
L203_100530-t1	879.454	0.59677	0.0567895	0.967397	1	0
L203_100531-t1	320944	-2.19031	1.04194e-18	-1.80684	0	1
L203_100532-t1	1655.74	0.56528	0.308791	0.818687	1	0
L203_100534-t1	3272.72	-0.886873	0.176166	-0.21252	0	1
L203_100535-t1	9848.18	-1.4656	0.00285475	-0.903493	0	1
L203_100536-t1	258.087	0.450689	0.42209	0.715779	1	0
L203_100537-t1	770.445	-0.0663118	0.917675	0.310538	1	0
L203_100538-t1	5403.18	-0.518309	0.186487	-0.206418	0	1
L203_100539-t1	7503.91	-0.576218	0.35529	-0.353538	0	1
L203_100540-t1	4521.43	-0.645158	0.0986843	-0.299878	0	1
L203_100541-t1	2337.5	0.364637	0.284703	0.760953	1	0
L203_100542-t1	3481.14	1.93857	0.00380465	2.55746	1	0
L203_100543-t1	7705.74	-1.0493	0.00869157	-0.61239	0	1
L203_100544-t1	20233.4	-1.11811	0.00397925	-0.612494	0	1
L203_100545-t1	49123	-2.57427	2.46329e-14	-2.19418	0	1
L203_100546-t1	12617.5	0.831249	0.0311186	1.12408	1	0
L203_100547-t1	1318.06	-0.356396	0.415248	0.102255	1	0
L203_100548-t1	60.6103	-0.653849	0.365466	-0.173882	0.136	0.864
L203_100549-t1	133992	-0.804437	0.134063	-0.288559	0	1
L203_100550-t1	5606.52	-2.74087	3.22941e-25	-2.33173	0	1
L203_100551-t1	4238.02	-4.02006	4.40921e-23	-3.48558	0	1
L203_100552-t1	8168.5	-1.07151	0.0065485	-0.558836	0	1
L203_100553-t1	3199.01	-0.19303	0.711956	0.291368	1	0
L203_100554-t1	340846	-2.06617	5.67039e-17	-1.6831	0	1
L203_100555-t1	4458.3	-0.139121	0.757839	0.232661	1	0
L203_100556-t1	3399.15	-1.51706	0.0158097	-0.892189	0	1
L203_100557-t1	54924.1	-2.48803	1.42887e-22	-2.08299	0	1
L203_100558-t1	4461.04	-0.553137	0.139027	-0.152871	0	1
L203_100559-t1	5182.82	0.343304	0.236039	0.717202	1	0
L203_100560-t1	1842.14	-0.165889	0.742853	0.125863	1	0
L203_100561-t1	4069.8	0.869161	0.0243286	1.25086	1	0
L203_100562-t1	513.523	-0.0153359	0.97643	0.42796	1	0
L203_100563-t1	2845.94	-0.260438	0.648351	0.028357	0.909	0.091
L203_100564-t1	5527.81	1.67725	3.56159e-05	1.95945	1	0
L203_100565-t1	6003.42	-1.54631	0.0100738	-1.09048	0	1
L203_100566-t1	4902.56	-0.17252	0.683261	0.154531	1	0
L203_100567-t1	861.369	0.0603362	0.924513	0.374155	1	0
L203_100568-t1	54267.1	0.368236	0.40761	0.640204	1	0
L203_100569-t1	5778.16	0.695143	0.218737	0.944776	1	0
L203_100570-t1	88247.2	-1.92368	6.67365e-05	-1.34037	0	1
L203_100571-t1	2659.68	-0.671465	0.0666582	-0.302185	0	1
L203_100572-t1	4341.95	-0.867974	0.127459	-0.373865	0	1
L203_100573-t1	5230.24	-0.523766	0.137591	-0.0715018	0	1
L203_100574-t1	1997.95	-0.602242	0.1367	-0.319525	0	1
L203_100575-t1	1592.72	0.34227	0.406216	0.6456	1	0
L203_100576-t1	969.171	2.102	0.001084	2.58449	1	0
L203_100577-t1	1809.76	-0.213173	0.600668	0.239691	1	0
L203_100578-t1	835.885	0.444901	0.183738	0.856348	1	0
L203_100579-t1	590.946	0.489763	0.211163	0.89061	1	0
L203_100580-t1	16398.3	0.309819	0.437647	0.614437	1	0
L203_100581-t1	9358.96	-0.625892	0.0865001	-0.194881	0	1
L203_100582-t1	460.558	-1.17921	0.160787	-0.666275	0	1
L203_100583-t1	5175.57	0.117365	0.729422	0.476765	1	0
L203_100584-t1	7310.22	-0.666676	0.198794	-0.0996857	0	1
L203_100585-t1	2070.38	0.891261	0.0455947	1.28696	1	0
L203_100586-t1	618.837	-2.27885	0.00151383	-1.65054	0	1
L203_100587-t1	12061.6	-0.354226	0.507035	0.152041	1	0
L203_100588-t1	41038	0.772806	0.115083	1.23508	1	0
L203_100589-t1	2988.91	-0.090817	0.893252	0.486951	1	0
L203_100590-t1	1649.89	0.751429	0.00841751	1.11578	1	0
L203_100591-t1	3350.75	0.0438269	0.919007	0.466392	1	0
L203_100592-t1	14668.1	-0.233333	0.545327	0.128584	1	0
L203_100593-t1	8928.25	-2.23981	1.50757e-12	-1.79488	0	1
L203_100594-t1	2840.84	-0.598023	0.0786457	-0.254159	0	1
L203_100595-t1	1551.81	-0.934169	0.0518128	-0.587471	0	1
L203_100596-t1	5.23454	-0.303392	0.889159	-0.00226326	0.496	0.504
L203_100597-t1	5795.7	2.03184	0.000162615	2.39521	1	0
L203_100598-t1	8354.26	0.735909	0.0575506	1.23342	1	0
L203_100599-t1	2351.25	-0.0822667	0.830392	0.273838	1	0
L203_100600-t1	431.489	1.15782	0.040176	1.73182	1	0
L203_100601-t1	10236.9	-0.540145	0.37409	-0.291827	0	1
L203_100602-t1	18032	1.21767	0.000507785	1.66424	1	0
L203_100603-t1	2031.96	0.389102	0.257721	0.710622	1	0
L203_100604-t1	28390.4	0.0458013	0.966564	0.175633	1	0
L203_100605-t1	7454.54	-0.0317357	0.943599	0.315902	1	0
L203_100606-t1	3414.54	0.447155	0.124797	0.840129	1	0
L203_100607-t1	1676.86	-1.23351	8.53346e-05	-0.880599	0	1
L203_100608-t1	7202.69	-0.188825	0.658264	0.19965	1	0
L203_100609-t1	587.015	0.306926	0.581465	0.618088	1	0
L203_100610-t1	2162.06	0.61414	0.0499667	1.03952	1	0
L203_100611-t1	7411.19	-0.65508	0.0714504	-0.328687	0	1
L203_100612-t1	10522.8	0.480788	0.378002	0.698565	1	0
L203_100613-t1	2688.15	0.767906	0.0669712	1.0325	1	0
L203_100614-t1	3063.14	0.943277	0.00136777	1.32242	1	0
L203_100615-t1	1022.57	1.51563	2.38577e-05	1.84327	1	0
L203_100616-t1	5624.59	0.275251	0.565952	0.545781	1	0
L203_100617-t1	3065.34	-1.22224	0.00602389	-0.756835	0	1
L203_100618-t1	2906.63	0.564469	0.064325	0.939926	1	0
L203_100619-t1	6111.31	-1.01289	0.000123736	-0.610766	0	1
L203_100620-t1	5222.9	-1.10614	0.00877688	-0.621731	0	1
L203_100621-t1	4121.61	0.000180807	0.999695	0.278913	1	0
L203_100622-t1	3995.11	-0.406543	0.516312	-0.0674873	0	1
L203_100623-t1	864.909	-0.107301	0.875321	0.200366	1	0
L203_100624-t1	2201.17	-0.431587	0.522307	-0.185968	0	1
L203_100625-t1	1452.54	0.800884	0.0805583	1.22583	1	0
L203_100626-t1	1500.43	-0.289757	0.539142	0.0325805	0.866	0.134
L203_100627-t1	1527.92	0.887146	0.103886	1.45988	1	0
L203_100628-t1	2232.2	5.04999	2.73847e-50	5.51306	1	0
L203_100629-t1	34937.5	-0.980087	0.00652943	-0.671103	0	1
L203_100630-t1	1842.91	0.0103024	0.978927	0.405894	1	0
L203_100631-t1	382.686	1.63328	1.60176e-05	1.96162	1	0
L203_100632-t1	1541.82	-1.61387	1.28975e-05	-1.22565	0	1
L203_100633-t1	7357.76	0.790635	0.0539857	1.07616	1	0
L203_100634-t1	1315.36	0.867871	0.11369	1.105	1	0
L203_100635-t1	5558.68	0.221756	0.493925	0.576609	1	0
L203_100636-t1	565.857	-0.367565	0.659148	0.162932	0.999	0.001
L203_100637-t1	2245.9	0.532956	0.1054	0.937789	1	0
L203_100638-t1	4129.55	-1.33066	3.11263e-08	-0.952162	0	1
L203_100639-t1	2129.83	-0.0821796	0.919007	0.528281	1	0
L203_100640-t1	3520.53	-1.73373	NA	-0.919729	0	1
L203_100641-t1	7054.75	0.676418	0.0276822	1.00016	1	0
L203_100642-t1	3743.31	-0.0599161	0.927412	0.446288	1	0
L203_100643-t1	4912.6	-0.154682	0.809499	0.402253	1	0
L203_100644-t1	11593.8	0.509966	0.273671	0.985398	1	0
L203_100645-t1	991.734	-0.136006	0.752724	0.19444	1	0
L203_100646-t1	4417.52	-0.114823	0.781117	0.271748	1	0
L203_100647-t1	2429.28	-1.36189	0.0078893	-0.941535	0	1
L203_100648-t1	4476.59	-0.253818	0.694995	0.090867	1	0
L203_100649-t1	34.8877	-1.92234	0.221189	-0.979469	0	1
L203_100650-t1	5854.61	0.683358	0.190498	0.903331	1	0
L203_100651-t1	1569.71	-0.361152	0.505353	-0.108116	0	1
L203_100652-t1	824.154	0.407265	0.249147	0.807248	1	0
L203_100653-t1	8564.61	1.58741	0.00785297	1.76011	1	0
L203_100654-t1	12146.2	-0.672383	0.162667	-0.387947	0	1
L203_100656-t1	1695.81	1.35895	0.0091735	1.56018	1	0
L203_100657-t1	25349.4	0.745132	0.204593	1.2048	1	0
L203_100658-t1	1065.39	0.264157	0.674845	0.478351	1	0
L203_100659-t1	96.5369	1.19594	0.0433947	1.45094	1	0
L203_100660-t1	3223.88	0.0984169	0.893635	0.438644	1	0
L203_100661-t1	4241.96	0.0622888	0.923413	0.306297	1	0
L203_100662-t1	37054.3	-0.50855	0.288447	-0.0738065	0	1
L203_100663-t1	766.423	-0.244384	0.79656	0.505972	1	0
L203_100664-t1	4635.93	-0.957249	0.0792214	-0.348232	0	1
L203_100665-t1	589063	-0.675189	0.434121	-0.0391524	0	1
L203_100666-t1	3992.64	0.254873	0.423296	0.655013	1	0
L203_100667-t1	8731.72	3.14962	1.08618e-12	3.41405	1	0
L203_100668-t1	3415.67	0.856059	0.218012	1.0034	1	0
L203_100669-t1	2767.02	0.00911173	0.986043	0.293347	1	0
L203_100670-t1	4033.47	0.293898	0.641109	0.887666	1	0
L203_100671-t1	2068.33	0.391133	0.381507	0.674036	1	0
L203_100672-t1	3952.11	-0.180781	0.610127	0.161475	1	0
L203_100673-t1	1095.04	-0.325966	0.381053	0.107782	1	0
L203_100674-t1	6131.13	1.02774	0.0168678	1.28363	1	0
L203_100675-t1	2803.38	0.490683	0.359888	0.731522	1	0
L203_100676-t1	5512.42	0.0658849	0.896288	0.409755	1	0
L203_100677-t1	4064.94	1.36795	0.00309605	1.58931	1	0
L203_100678-t1	1720.71	0.996876	0.00472342	1.34058	1	0
L203_100679-t1	3862.07	-0.772291	0.0544609	-0.303272	0	1
L203_100680-t1	37273.3	0.824429	0.174344	1.00541	1	0
L203_100681-t1	11497.3	0.379804	0.32373	0.750932	1	0
L203_100682-t1	636.772	0.067646	0.875197	0.452764	1	0
L203_100683-t1	7192.11	0.491893	0.382096	0.795775	1	0
L203_100684-t1	2274.56	1.92516	3.83405e-12	2.33336	1	0
L203_100685-t1	5847.23	-1.69544	0.00856342	-1.07698	0	1
L203_100686-t1	3285.25	0.671642	0.0980225	1.09978	1	0
L203_100687-t1	2953.68	0.325015	0.320524	0.706606	1	0
L203_100688-t1	12029.5	2.2606	1.61052e-05	2.4579	1	0
L203_100689-t1	10491.5	-0.445165	0.271426	-0.159306	0	1
L203_100690-t1	5192.5	-0.225182	0.59046	0.218905	1	0
L203_100692-t1	3871.84	-0.745122	0.0296497	-0.285165	0	1
L203_100693-t1	3083.96	0.700091	0.197959	1.18345	1	0
L203_100694-t1	9019.82	0.0412342	0.949178	0.577625	1	0
L203_100695-t1	6370.38	-0.052381	0.911459	0.326963	1	0
L203_100696-t1	3963.95	-0.679775	0.196453	-0.133314	0	1
L203_100697-t1	55108.5	1.20235	0.0118945	1.44848	1	0
L203_100698-t1	751.353	-0.0584832	0.916232	0.343192	1	0
L203_100699-t1	6166.85	-0.20968	0.715034	0.217318	1	0
L203_100700-t1	369.124	0.685778	0.133625	1.08886	1	0
L203_100701-t1	281.488	0.262529	0.648936	0.703694	1	0
L203_100702-t1	940.335	-0.824478	0.00781487	-0.424438	0	1
L203_100703-t1	492.362	0.189217	0.635866	0.609396	1	0
L203_100704-t1	2149.82	1.0091	0.0771808	1.20622	1	0
L203_100705-t1	1275.06	-0.733501	0.0451021	-0.349445	0	1
L203_100706-t1	3085.13	-0.5394	0.206273	-0.0422101	0.017	0.983
L203_100707-t1	23528.3	-2.78681	1.27356e-05	-2.04839	0	1
L203_100708-t1	12567.2	-3.26086	1.37409e-05	-2.44911	0	1
L203_100709-t1	7536.86	0.849398	0.0489114	1.23169	1	0
L203_100710-t1	3342.71	-0.106413	0.819693	0.187109	1	0
L203_100711-t1	21145.3	1.38594	9.8688e-05	1.69754	1	0
L203_100712-t1	587.482	1.67003	0.00177061	2.01886	1	0
L203_100713-t1	794.931	0.396813	0.503818	0.614201	1	0
L203_100714-t1	7185.07	0.547277	0.322628	0.93163	1	0
L203_100715-t1	1686.24	-0.813958	0.0340339	-0.342054	0	1
L203_100716-t1	2864.52	0.0395666	0.949984	0.361488	1	0
L203_100717-t1	30128	1.49009	0.00258179	1.69162	1	0
L203_100718-t1	22712.7	0.0670665	0.923456	0.51918	1	0
L203_100719-t1	3314.77	-0.975896	0.0244523	-0.462471	0	1
L203_100720-t1	11392.4	-2.92091	1.98197e-11	-2.33685	0	1
L203_100721-t1	69952.7	-1.83085	3.68659e-08	-1.52844	0	1
L203_100722-t1	4025.86	0.0175396	0.97449	0.501831	1	0
L203_100723-t1	6515.54	0.7421	0.0162217	1.09056	1	0
L203_100724-t1	815.585	0.063738	0.927409	0.636358	1	0
L203_100725-t1	3497.5	0.118017	0.850172	0.532117	1	0
L203_100726-t1	3325.78	-0.696941	0.0397308	-0.247988	0	1
L203_100727-t1	3838.82	-0.393987	0.385464	0.118346	1	0
L203_100729-t1	32384.6	-1.90123	2.17122e-06	-1.3648	0	1
L203_100730-t1	3874.96	-0.0164535	0.982124	0.302196	1	0
L203_100731-t1	2193.37	-1.26802	0.0492789	-0.610265	0	1
L203_100732-t1	6643.2	-1.41596	0.00965037	-0.785048	0	1
L203_100733-t1	3204.67	1.0959	0.00100618	1.39361	1	0
L203_100734-t1	6517.11	0.965421	0.00281368	1.33051	1	0
L203_100735-t1	62763.4	0.173826	0.740587	0.690015	1	0
L203_100736-t1	979.992	-1.37435	0.0267474	-0.715234	0	1
L203_100737-t1	655.604	-1.504	0.0315449	-0.775615	0	1
L203_100738-t1	521.041	-1.01537	0.0932136	-0.433301	0	1
L203_100739-t1	8339.41	1.10203	0.0066896	1.36173	1	0
L203_100740-t1	5483.52	-0.584006	0.190536	-0.25567	0	1
L203_100741-t1	28.377	-0.619024	0.61655	-0.252827	0.1	0.9
L203_100742-t1	2338.46	-0.559857	0.148797	-0.240302	0	1
L203_100743-t1	4284.93	-0.545727	0.144028	-0.218682	0	1
L203_100744-t1	7058.36	0.91419	0.0529093	1.14301	1	0
L203_100745-t1	12422.5	-0.287284	0.660387	0.277592	1	0
L203_100746-t1	2478.95	0.507047	0.134355	0.828112	1	0
L203_100747-t1	20211.6	-0.142434	0.777547	0.207593	1	0
L203_100748-t1	31703.7	1.04779	0.000473872	1.40878	1	0
L203_100749-t1	3556.42	0.800753	0.135297	1.34995	1	0
L203_100750-t1	2199.85	0.152545	0.807397	0.678054	1	0
L203_100751-t1	2922.87	-0.685281	0.0246152	-0.345658	0	1
L203_100752-t1	2386.68	-1.29915	2.243e-05	-0.875135	0	1
L203_100753-t1	3434.69	-2.03808	1.40305e-06	-1.558	0	1
L203_100754-t1	5766.79	0.697154	0.122469	1.09463	1	0
L203_100755-t1	11487.3	-1.17699	0.0248502	-0.877352	0	1
L203_100756-t1	7529.49	0.125254	0.820605	0.546383	1	0
L203_100757-t1	1703.22	1.02247	0.00479607	1.3864	1	0
L203_100758-t1	1652.32	0.147306	0.698167	0.523251	1	0
L203_100759-t1	2438.08	-0.445386	0.254227	-0.0412991	0.034	0.966
L203_100760-t1	5257.8	0.64261	0.114757	0.916316	1	0
L203_100761-t1	10668.7	0.523726	0.111064	0.859039	1	0
L203_100762-t1	1004.89	-1.88549	0.000277716	-1.31484	0	1
L203_100763-t1	1796.6	0.199649	0.619293	0.613899	1	0
L203_100764-t1	3557.91	0.687969	0.0308641	1.03043	1	0
L203_100765-t1	11262.9	0.139273	0.72871	0.471073	1	0
L203_100766-t1	5509.91	-0.166344	0.676861	0.26853	1	0
L203_100767-t1	3876.14	-0.172168	0.766802	0.0842004	1	0
L203_100768-t1	5722.49	-0.86264	0.0178954	-0.493053	0	1
L203_100769-t1	8859.27	0.962599	0.0646784	1.32744	1	0
L203_100770-t1	3352.33	0.823353	0.00385469	1.23862	1	0
L203_100771-t1	4211.7	-0.984956	0.00536595	-0.520598	0	1
L203_100772-t1	7819.49	-1.51076	0.00476083	-0.88233	0	1
L203_100773-t1	1649.33	-0.420866	0.567448	-0.167628	0	1
L203_100774-t1	943.443	0.63336	0.047703	0.982422	1	0
L203_100775-t1	1086.92	1.17566	0.0123236	1.43233	1	0
L203_100776-t1	3294.28	0.271158	0.64026	0.742877	1	0
L203_100777-t1	5465.3	0.258088	0.497559	0.670913	1	0
L203_100778-t1	9723.86	-2.0497	0.000118403	-1.60504	0	1
L203_100779-t1	6406.67	-0.0771245	0.885356	0.217901	1	0
L203_100780-t1	26156.6	-1.0723	0.0173155	-0.66008	0	1
L203_100781-t1	1804.6	0.0301623	0.95962	0.398602	1	0
L203_100782-t1	7366.57	-0.165424	0.753696	0.355107	1	0
L203_100783-t1	8361.25	0.00408627	0.993685	0.53058	1	0
L203_100784-t1	8759.44	1.15753	0.008277	1.43993	1	0
L203_100785-t1	103112	0.0802937	0.882548	0.485643	1	0
L203_100786-t1	3830.52	0.753668	0.100504	1.12238	1	0
L203_100787-t1	2315.63	0.391003	0.354655	0.863899	1	0
L203_100788-t1	5892.65	-2.31571	5.36618e-05	-1.64386	0	1
L203_100789-t1	5081.14	0.492064	0.199768	0.795335	1	0
L203_100790-t1	2869.74	0.455903	0.41676	0.861741	1	0
L203_100791-t1	2306.69	-0.192194	0.656673	0.107554	1	0
L203_100792-t1	3650.88	-1.0194	0.016839	-0.719105	0	1
L203_100793-t1	1491.76	0.187365	0.693378	0.506267	1	0
L203_100794-t1	1768.37	-0.321818	0.453163	0.0475244	0.963	0.037
L203_100795-t1	10118.2	-1.87581	0.0143202	-1.1115	0	1
L203_100796-t1	2902.74	-0.227588	0.703254	0.221766	1	0
L203_100797-t1	407.536	1.13676	0.00629701	1.59279	1	0
L203_100798-t1	1178.34	0.299001	0.580189	0.598241	1	0
L203_100799-t1	2495.35	-0.801455	0.0135945	-0.468385	0	1
L203_100800-t1	12285.9	-0.108658	0.836784	0.159461	1	0
L203_100801-t1	2094.53	0.210768	0.77342	0.410146	1	0
L203_100802-t1	22096	-0.0985236	0.840732	0.18025	1	0
L203_100803-t1	8198.49	1.00832	0.0190951	1.29226	1	0
L203_100804-t1	4698.21	-0.495256	0.153948	-0.183175	0	1
L203_100805-t1	3066.32	-0.348423	0.322988	0.0012546	0.544	0.456
L203_100806-t1	2914.63	0.320697	0.654662	0.491956	1	0
L203_100807-t1	9955.26	-1.25934	0.000357704	-0.977456	0	1
L203_100808-t1	4147.54	0.0078737	0.986043	0.348232	1	0
L203_100809-t1	12215.1	-0.451795	0.161077	-0.0142267	0.1	0.9
L203_100810-t1	651.747	-0.331715	0.404592	0.0307598	0.74	0.26
L203_100811-t1	2971	0.196707	0.72728	0.56625	1	0
L203_100812-t1	6009.11	0.208666	0.675228	0.606291	1	0
L203_100813-t1	6387.44	0.171245	0.586638	0.544505	1	0
L203_100814-t1	941.837	0.153447	0.75631	0.588315	1	0
L203_100815-t1	3398.07	0.287141	0.56452	0.56351	1	0
L203_100816-t1	1103.84	0.555854	0.321749	0.963622	1	0
L203_100817-t1	484.828	-0.534037	0.280369	-0.240412	0	1
L203_100818-t1	54.6076	-0.056738	0.963856	0.155231	0.844	0.156
L203_100819-t1	557.729	-0.84772	0.303575	-0.24552	0	1
L203_100820-t1	884.574	0.872934	0.270024	1.06022	1	0
L203_100821-t1	1111.1	0.617694	0.190428	0.870519	1	0
L203_100822-t1	3168.84	0.240474	0.556424	0.544683	1	0
L203_100823-t1	276.316	0.306709	0.735045	0.830223	1	0
L203_100824-t1	514.547	-0.720272	0.499349	-0.375723	0	1
L203_100825-t1	8232.25	-0.180372	0.780539	0.0839418	1	0
L203_100826-t1	4266.1	-0.054394	0.938335	0.188781	1	0
L203_100827-t1	1560.36	0.552316	0.289511	0.782081	1	0
L203_100828-t1	9682.42	0.402703	0.409252	0.713608	1	0
L203_100829-t1	4862.63	0.0786375	0.859358	0.418838	1	0
L203_100830-t1	638.966	1.19798	0.0246152	1.43721	1	0
L203_100831-t1	9408.26	-0.027313	0.941793	0.356042	1	0
L203_100832-t1	898.712	0.902177	0.0107097	1.30898	1	0
L203_100833-t1	561.158	0.814646	0.195064	1.23652	1	0
L203_100834-t1	19334.6	0.473076	0.132046	0.908805	1	0
L203_100835-t1	1789.4	-1.09313	0.0129672	-0.777072	0	1
L203_100836-t1	1626.15	-0.76138	0.0796654	-0.336706	0	1
L203_100837-t1	3462.31	0.0455799	0.948834	0.390084	1	0
L203_100838-t1	6771.04	-2.38902	4.66296e-11	-1.87111	0	1
L203_100839-t1	6451.48	-0.270892	0.520749	0.0237379	0.963	0.037
L203_100840-t1	1925.44	-1.16632	0.0603141	-0.931032	0	1
L203_100841-t1	7303.3	0.260988	0.60011	0.562992	1	0
L203_100842-t1	2836.68	1.17847	0.00163614	1.55462	1	0
L203_100843-t1	7115.78	0.655015	0.087316	0.952647	1	0
L203_100844-t1	4625.77	-0.783348	0.0527223	-0.393899	0	1
L203_100845-t1	7362.18	-0.910841	0.238974	-0.154363	0	1
L203_100847-t1	2996.24	0.236605	0.678621	0.476682	1	0
L203_100848-t1	3543.83	-0.616213	0.133158	-0.283412	0	1
L203_100849-t1	2661.45	0.0406564	0.921948	0.427949	1	0
L203_100850-t1	6633.23	-0.306415	0.560707	-0.0583304	0	1
L203_100851-t1	2737.9	-0.0446807	0.940209	0.222681	1	0
L203_100852-t1	2657.61	-1.27653	0.00463241	-0.73074	0	1
L203_100853-t1	2579.28	0.73048	0.0824711	1.03041	1	0
L203_100854-t1	924.067	0.407829	0.377741	0.828347	1	0
L203_100855-t1	2984.53	-0.102745	0.830849	0.232133	1	0
L203_100856-t1	5124.33	-2.08485	1.61052e-05	-1.52844	0	1
L203_100857-t1	3160.04	-0.565852	0.0732451	-0.162842	0	1
L203_100858-t1	3050.34	-0.177694	0.651993	0.171079	1	0
L203_100859-t1	7994.77	0.0648652	0.917043	0.396083	1	0
L203_100860-t1	4779.99	0.284455	0.422184	0.67267	1	0
L203_100861-t1	7539.64	0.479183	0.129091	0.894403	1	0
L203_100862-t1	9646.39	0.428625	0.215051	0.765059	1	0
L203_100864-t1	3119.25	0.708758	0.0101973	1.0947	1	0
L203_100865-t1	1446.05	0.783607	0.0541238	1.06265	1	0
L203_100866-t1	845.19	0.00841706	0.991657	0.306169	1	0
L203_100867-t1	1613.59	0.218558	0.715646	0.452722	1	0
L203_100868-t1	4691.86	-0.781282	0.0312813	-0.361679	0	1
L203_100869-t1	7404.72	0.12253	0.84395	0.670015	1	0
L203_100870-t1	49093.3	1.44402	0.00251293	1.92807	1	0
L203_100871-t1	4083.05	0.508637	0.133768	0.857862	1	0
L203_100872-t1	1995	0.0745775	0.897653	0.380109	1	0
L203_100873-t1	4134.19	-0.0827139	0.916259	0.152521	1	0
L203_100874-t1	3063.58	-1.37607	0.0286212	-0.790972	0	1
L203_100875-t1	5612.86	1.97884	2.78627e-05	2.19161	1	0
L203_100876-t1	6645.65	0.524534	0.0733206	0.871402	1	0
L203_100877-t1	2434.41	0.530247	0.152475	0.833489	1	0
L203_100878-t1	1876.09	-0.105655	0.829338	0.247381	1	0
L203_100879-t1	11790.6	0.2419	0.612492	0.732096	1	0
L203_100880-t1	11128.4	0.500696	0.362159	0.966718	1	0
L203_100881-t1	35534.5	0.287887	0.672946	0.480823	1	0
L203_100882-t1	7188.93	0.909358	0.0333258	1.15761	1	0
L203_100883-t1	4050.89	-0.0727749	0.879301	0.405448	1	0
L203_100884-t1	3082.23	-0.938214	0.0231742	-0.476174	0	1
L203_100885-t1	1428.95	-0.749512	0.255025	-0.221271	0	1
L203_100886-t1	4093.02	-0.581243	0.176385	-0.0771746	0	1
L203_100887-t1	1256.99	0.537143	0.197058	0.818801	1	0
L203_100888-t1	4977.17	-1.65012	6.52121e-06	-1.36249	0	1
L203_100889-t1	9074.21	0.48343	0.0974829	0.834574	1	0
L203_100890-t1	4839.62	-0.816875	0.0639819	-0.528161	0	1
L203_100891-t1	4634.5	-1.92245	0.00285735	-1.43865	0	1
L203_100892-t1	4728.55	0.65526	0.0285169	1.05864	1	0
L203_100893-t1	2256.21	-1.31136	0.0967371	-0.94563	0	1
L203_100894-t1	8713.57	-1.24657	0.000152888	-0.846433	0	1
L203_100895-t1	3199.34	-0.224539	0.527651	0.123534	1	0
L203_100896-t1	14504.9	-0.474209	0.144549	-0.0420139	0	1
L203_100897-t1	13074.3	0.084365	0.855888	0.38022	1	0
L203_100898-t1	13309.9	-0.240888	0.685966	0.290566	1	0
L203_100899-t1	6687.36	0.382818	0.277967	0.766044	1	0
L203_100900-t1	14282.9	-1.30717	0.000166109	-0.948025	0	1
L203_100901-t1	3574.19	-0.899504	0.161234	-0.231469	0	1
L203_100902-t1	1986.48	-0.580475	0.11564	-0.267895	0	1
L203_100903-t1	16796.2	-0.714015	0.215241	-0.457248	0	1
L203_100904-t1	3271.23	-0.0827353	0.893635	0.180581	1	0
L203_100905-t1	2234.78	0.649807	0.107649	1.01613	1	0
L203_100906-t1	50253.2	0.480692	0.361018	0.90599	1	0
L203_100907-t1	60924.8	0.78799	0.00337378	1.14026	1	0
L203_100908-t1	1893.98	0.789597	0.191107	1.39032	1	0
L203_100909-t1	2012.66	-0.688631	0.0891236	-0.27858	0	1
L203_100910-t1	2643.86	-0.334554	0.453148	-0.0583719	0.008	0.992
L203_100911-t1	1622.69	-0.848806	0.255089	-0.337311	0	1
L203_100912-t1	3772.12	0.496673	0.302048	0.746769	1	0
L203_100913-t1	7103.95	-0.171442	0.706317	0.286857	1	0
L203_100914-t1	2218.74	0.303598	0.495166	0.592847	1	0
L203_100915-t1	5026.91	-0.353683	0.317491	0.0134694	0.783	0.217
L203_100916-t1	2661.5	0.282474	0.531071	0.62068	1	0
L203_100917-t1	12845.2	0.308111	0.63698	0.511205	1	0
L203_100918-t1	2408.62	-0.0979201	0.851904	0.226398	1	0
L203_100919-t1	2345.33	0.0399729	0.958842	0.27078	1	0
L203_100920-t1	5911.92	-0.459032	0.513196	0.191916	1	0
L203_100921-t1	7195.96	-1.29426	0.0173118	-0.720208	0	1
L203_100922-t1	43165	-1.47717	0.000320769	-0.960793	0	1
L203_100923-t1	647.706	-0.987849	0.144028	-0.419949	0	1
L203_100924-t1	2608.98	-1.18095	0.0231141	-0.630601	0	1
L203_100925-t1	3565.83	0.241125	0.51538	0.639121	1	0
L203_100926-t1	1407.54	-0.0160624	0.97643	0.398186	1	0
L203_100927-t1	3815.27	0.340096	0.400734	0.641907	1	0
L203_100928-t1	4728.84	-0.190629	0.586638	0.177535	1	0
L203_100929-t1	3767.61	-0.699075	0.226571	-0.245715	0	1
L203_100930-t1	1377.54	0.771474	0.106169	1.09647	1	0
L203_100931-t1	3297.88	-2.54888	0.000111159	-1.80206	0	1
L203_100932-t1	2228.49	2.52116	1.46163e-07	3.05954	1	0
L203_100933-t1	4151.87	-0.469865	0.309758	-0.0151978	0.21	0.79
L203_100934-t1	6644.38	0.647127	0.033318	1.01028	1	0
L203_100935-t1	4678.7	0.340908	0.256678	0.724965	1	0
L203_100936-t1	2258.32	-1.47309	0.00318127	-0.886862	0	1
L203_100937-t1	7945.52	-1.6527	6.89729e-07	-1.27016	0	1
L203_100938-t1	5546.25	-1.749	9.98599e-06	-1.21829	0	1
L203_100939-t1	13481.6	-1.06699	0.00675252	-0.703003	0	1
L203_100940-t1	15364	-0.387517	0.636695	0.22504	1	0
L203_100941-t1	4093.81	-0.821581	0.261015	-0.109588	0	1
L203_100942-t1	65658.5	-0.702658	0.172525	-0.188983	0	1
L203_100943-t1	3237.14	0.503754	0.161838	0.87238	1	0
L203_100944-t1	2008.61	-0.627996	0.176275	-0.368724	0	1
L203_100945-t1	778.504	0.66938	0.0801552	1.0383	1	0
L203_100946-t1	667.053	0.00989438	0.988686	0.223917	1	0
L203_100947-t1	4830.01	1.09863	0.00841918	1.39114	1	0
L203_100948-t1	5030.96	-1.61573	7.89118e-11	-1.24044	0	1
L203_100949-t1	24770.6	0.567698	0.356623	0.748624	1	0
L203_100950-t1	1302.74	0.63712	0.323411	0.809456	1	0
L203_100951-t1	5294.84	-0.215695	0.591518	0.234857	1	0
L203_100952-t1	3755.17	-1.52696	0.000476329	-0.972524	0	1
L203_100953-t1	2734.45	1.61722	0.000158607	1.88116	1	0
L203_100954-t1	7289.07	-0.183539	0.709198	0.19478	1	0
L203_100955-t1	2377.41	0.688059	0.127664	1.07479	1	0
L203_100956-t1	113.498	-1.13543	0.0312503	-0.787934	0	1
L203_100957-t1	6035.87	-1.34139	0.00183782	-0.993993	0	1
L203_100958-t1	49295.2	-0.428871	0.346492	-0.127739	0	1
L203_100959-t1	7215.52	0.052022	0.929551	0.31148	1	0
L203_100960-t1	5054.65	-1.12563	0.0123438	-0.582431	0	1
L203_100961-t1	4689.71	0.00984522	0.983481	0.322586	1	0
L203_100962-t1	3457.32	0.709203	0.0211927	1.05992	1	0
L203_100963-t1	9941.32	-0.205147	0.780724	0.426941	1	0
L203_100964-t1	60252.7	0.235112	0.660695	0.746923	1	0
L203_100965-t1	2251.98	0.807935	0.0421088	1.08528	1	0
L203_100966-t1	5138.52	0.824906	0.0053961	1.19493	1	0
L203_100967-t1	2768.95	-0.106577	0.771459	0.239642	1	0
L203_100969-t1	70399.3	-0.190491	0.598739	0.16543	1	0
L203_100970-t1	10298.3	-2.78058	3.19154e-22	-2.37868	0	1
L203_100971-t1	5607.15	-0.241933	0.567287	0.064469	1	0
L203_100972-t1	8108.92	-1.19173	7.08549e-06	-0.829273	0	1
L203_100973-t1	5561.48	-0.951073	0.0611205	-0.417963	0	1
L203_100974-t1	8829.76	-1.05154	0.112732	-0.392603	0	1
L203_100975-t1	6244.31	1.58988	0.00146989	1.79049	1	0
L203_100976-t1	2826.06	-0.0773379	0.901382	0.188287	1	0
L203_100977-t1	3051.52	1.44984	0.000201829	1.75662	1	0
L203_100978-t1	1816.7	-0.107219	0.781117	0.265089	1	0
L203_100979-t1	4873.57	1.19598	0.0110208	1.41676	1	0
L203_100980-t1	2431.28	0.972802	0.00374878	1.27698	1	0
L203_100981-t1	2111.76	0.15789	0.815719	0.596649	1	0
L203_100982-t1	1353.19	-0.823186	0.0454874	-0.480999	0	1
L203_100983-t1	3164.28	-0.387764	0.306072	-0.0360883	0.033	0.967
L203_100984-t1	1642.77	0.282125	0.43246	0.633041	1	0
L203_100985-t1	5440.19	-0.973512	0.00981065	-0.479458	0	1
L203_100986-t1	1569.33	0.260053	0.537906	0.565568	1	0
L203_100987-t1	81978.9	-2.05518	1.00206e-12	-1.68313	0	1
L203_100988-t1	6769.33	-0.538477	0.179622	-0.102134	0	1
L203_100989-t1	6873.33	0.876475	0.123896	1.08121	1	0
L203_100990-t1	2179.52	0.392166	0.225169	0.739684	1	0
L203_100991-t1	2537.95	0.413865	0.183466	0.774292	1	0
L203_100992-t1	2358.47	-0.396473	0.354167	0.040654	0.955	0.045
L203_100993-t1	5279.47	-0.828551	0.0277908	-0.332496	0	1
L203_100994-t1	2071.43	-0.0152572	0.978034	0.405197	1	0
L203_100995-t1	6263.02	1.23604	0.00250226	1.48933	1	0
L203_100996-t1	375.075	1.17189	0.0264735	1.47352	1	0
L203_100997-t1	1650.92	0.415783	0.295509	0.725436	1	0
L203_100998-t1	4504.42	-0.203209	0.559992	0.215803	1	0
L203_100999-t1	7766.96	0.579312	0.285884	1.16643	1	0
L203_101000-t1	159511	5.60291	9.57155e-28	5.78472	1	0
L203_101001-t1	3176.52	0.25307	0.63521	0.576338	1	0
L203_101002-t1	1949.69	-0.13523	0.888964	0.603929	1	0
L203_101003-t1	1681.09	0.185187	0.722503	0.531459	1	0
L203_101004-t1	3345.44	0.204093	0.534263	0.587394	1	0
L203_101005-t1	925.418	0.134066	0.890132	0.363721	1	0
L203_101006-t1	3728.12	0.885516	0.0557669	1.12996	1	0
L203_101007-t1	7674.29	-1.10969	0.000429969	-0.742739	0	1
L203_101008-t1	2053.11	-1.40615	0.036418	-0.980537	0	1
L203_101009-t1	3235.88	-0.802408	0.00788523	-0.367751	0	1
L203_101010-t1	1990.12	-0.8523	0.00139447	-0.449979	0	1
L203_101011-t1	409.451	0.570995	0.150054	0.887759	1	0
L203_101012-t1	2931.19	0.949863	0.00097984	1.28675	1	0
L203_101013-t1	3187	-0.00507382	0.990697	0.323405	1	0
L203_101014-t1	2609	0.503633	0.254081	0.771979	1	0
L203_101015-t1	4457.66	0.00686652	0.986043	0.358149	1	0
L203_101016-t1	2816.3	-0.0813182	0.83723	0.267356	1	0
L203_101017-t1	11149.6	-0.472946	0.144028	-0.12201	0	1
L203_101018-t1	4785.57	-0.564944	0.111035	-0.248596	0	1
L203_101019-t1	173.405	-0.34929	0.675345	0.175263	0.976	0.024
L203_101020-t1	4304.5	-1.58661	2.8542e-09	-1.19974	0	1
L203_101021-t1	173114	-0.456661	0.285838	0.0458902	1	0
L203_101022-t1	151696	-1.29343	0.0339914	-0.731904	0	1
L203_101023-t1	2529.89	-0.75011	0.0935853	-0.265221	0	1
L203_101024-t1	2467.85	0.355042	0.359069	0.759846	1	0
L203_101025-t1	3455.19	0.839849	0.0493619	1.18445	1	0
L203_101026-t1	13244.3	-1.31804	0.0311186	-0.717824	0	1
L203_101027-t1	2533.93	-0.617505	0.239049	-0.323428	0	1
L203_101028-t1	1160.5	0.663653	0.287159	0.904288	1	0
L203_101029-t1	1801.41	-0.983315	0.0672153	-0.622949	0	1
L203_101030-t1	1838.39	0.773311	0.153063	1.05905	1	0
L203_101031-t1	504.989	-0.698341	0.132985	-0.347235	0	1
L203_101032-t1	6173.87	-2.1044	7.89163e-06	-1.67887	0	1
L203_101033-t1	13736.2	-1.22197	0.00857233	-0.790647	0	1
L203_101034-t1	6067.06	-4.96562	9.93141e-19	-4.28373	0	1
L203_101035-t1	12813	-1.1468	0.0273029	-0.580213	0	1
L203_101036-t1	4010.08	-1.33475	0.0110214	-0.836142	0	1
L203_101038-t1	2851.02	-0.327951	0.601203	0.032792	0.915	0.085
L203_101039-t1	13485.8	0.696386	0.00582383	1.08333	1	0
L203_101040-t1	18660	-1.50494	0.00190878	-0.911577	0	1
L203_101041-t1	6793.74	-0.59638	0.0315039	-0.199575	0	1
L203_101042-t1	6311.82	0.450665	0.190135	0.899238	1	0
L203_101043-t1	4429.51	-1.26033	0.00023783	-0.782778	0	1
L203_101044-t1	7446.9	1.21373	0.000411394	1.53851	1	0
L203_101045-t1	1431.99	0.156482	0.706035	0.564642	1	0
L203_101046-t1	4996.05	-1.53158	NA	-0.700333	0	1
L203_101047-t1	337.991	-2.06187	NA	-1.08946	0	1
L203_101048-t1	1607.47	-0.190254	0.827443	0.450063	1	0
L203_101049-t1	2822.27	0.61394	0.298755	0.869816	1	0
L203_101050-t1	93508.1	-0.513547	0.309442	-0.216672	0	1
L203_101051-t1	5368.22	0.328537	0.432393	0.64453	1	0
L203_101052-t1	14515.6	1.12999	1.01976e-05	1.5085	1	0
L203_101053-t1	2940.54	-0.189929	0.648265	0.256769	1	0
L203_101054-t1	4928.02	1.00894	0.00234763	1.33219	1	0
L203_101055-t1	4021.58	-0.701367	0.177721	-0.422018	0	1
L203_101056-t1	1957.74	0.0265329	0.965153	0.334328	1	0
L203_101057-t1	5576.7	-0.885668	0.00312574	-0.531748	0	1
L203_101058-t1	31018.4	-2.42133	2.73257e-20	-2.03898	0	1
L203_101059-t1	5069.94	0.354031	0.387861	0.764499	1	0
L203_101060-t1	6847.05	0.153435	0.738951	0.464334	1	0
L203_101061-t1	1545.59	-0.662204	0.13009	-0.329457	0	1
L203_101062-t1	630.742	0.126585	0.831137	0.483385	1	0
L203_101063-t1	886.141	0.779802	0.260729	1.14524	1	0
L203_101064-t1	6603.66	-0.646382	0.0359602	-0.209603	0	1
L203_101065-t1	14173.5	0.536107	0.186487	0.866417	1	0
L203_101066-t1	5575.78	0.327419	0.34864	0.671855	1	0
L203_101067-t1	2710.5	0.426383	0.218604	0.793929	1	0
L203_101068-t1	8680.66	-0.362239	0.348069	0.109213	1	0
L203_101069-t1	5679.27	-0.150119	0.746129	0.243401	1	0
L203_101070-t1	2529.71	-1.44691	0.000607373	-1.13517	0	1
L203_101071-t1	6299.25	-0.0883594	0.856119	0.320993	1	0
L203_101072-t1	4074.27	0.53618	0.211943	0.863344	1	0
L203_101073-t1	2903.86	0.167069	0.793144	0.438751	1	0
L203_101074-t1	3829.26	0.10297	0.892815	0.296898	1	0
L203_101076-t1	2027.33	0.486919	0.131354	0.914817	1	0
L203_101077-t1	6189.6	0.185508	0.820266	0.420757	1	0
L203_101078-t1	4706.12	-0.00775061	0.990697	0.21795	1	0
L203_101079-t1	2371.73	-0.63775	0.177721	-0.279364	0	1
L203_101080-t1	1908.08	-0.00138	0.997911	0.320219	1	0
L203_101081-t1	2128.08	-0.206693	0.568732	0.202825	1	0
L203_101082-t1	4916.62	0.0594375	0.916232	0.532875	1	0
L203_101083-t1	6753.98	-0.698509	0.153299	-0.438559	0	1
L203_101084-t1	1809	0.0693635	0.870901	0.507445	1	0
L203_101087-t1	2361.44	-0.0889529	0.844907	0.345328	1	0
L203_101089-t1	1170.15	-0.213921	0.611349	0.217851	1	0
L203_101090-t1	7785.71	2.36815	4.1253e-05	2.67481	1	0
L203_101091-t1	1309	-0.289259	0.545309	0.101031	0.999	0.001
L203_101092-t1	3439.29	-0.691833	0.13071	-0.164567	0	1
L203_101093-t1	3117.9	0.390558	0.363904	0.708461	1	0
L203_101094-t1	3765.79	0.848865	0.0691732	1.10428	1	0
L203_101095-t1	12609.4	0.877255	0.0497711	1.13803	1	0
L203_101096-t1	9265.01	0.566645	0.132985	0.872049	1	0
L203_101097-t1	1333.39	0.244915	0.629746	0.540156	1	0
L203_101098-t1	31137.2	0.568555	0.434974	0.821016	1	0
L203_101099-t1	796.569	1.09964	0.00221642	1.44353	1	0
L203_101100-t1	28700	-1.33108	0.0178008	-0.691641	0	1
L203_101101-t1	2916.68	0.61652	0.0338798	1.01548	1	0
L203_101102-t1	964.003	0.640927	0.134295	0.918134	1	0
L203_101103-t1	1131.31	0.627843	0.024687	0.998997	1	0
L203_101104-t1	1630.93	1.04167	0.00857493	1.46275	1	0
L203_101105-t1	2013.4	-0.00721013	0.986043	0.341132	1	0
L203_101106-t1	2459.35	0.267908	0.51367	0.673059	1	0
L203_101107-t1	4883.41	-0.580187	0.108348	-0.108116	0	1
L203_101108-t1	39111.6	0.781404	0.28337	0.920705	1	0
L203_101109-t1	2107.76	1.27971	0.000160481	1.604	1	0
L203_101110-t1	12256.3	0.153074	0.766986	0.641749	1	0
L203_101111-t1	12449.5	0.0865595	0.836109	0.491586	1	0
L203_101112-t1	19415.2	-1.73703	0.00204779	-1.08372	0	1
L203_101114-t1	4706.41	0.629106	0.0578255	1.05127	1	0
L203_101115-t1	4842.55	0.751553	0.0692992	1.01483	1	0
L203_101116-t1	4577.49	-0.308293	0.565093	0.225534	1	0
L203_101117-t1	1804.32	1.34002	0.00144572	1.60395	1	0
L203_101118-t1	2866.77	0.0830359	0.930481	0.308384	1	0
L203_101119-t1	8114.12	0.813055	0.00308779	1.17165	1	0
L203_101120-t1	16221	-2.68696	3.43618e-09	-2.10069	0	1
L203_101121-t1	3878.77	2.57025	7.43363e-10	2.81008	1	0
L203_101122-t1	3363.52	-1.78982	2.37343e-08	-1.33326	0	1
L203_101123-t1	2616.82	-0.277329	0.580212	0.154311	1	0
L203_101124-t1	1294.75	-0.471776	0.365382	0.0384643	0.891	0.109
L203_101125-t1	2951.91	0.893769	0.0437986	1.23904	1	0
L203_101126-t1	3090.08	0.2892	0.703565	0.470677	1	0
L203_101127-t1	1924.77	0.117699	0.758633	0.52088	1	0
L203_101128-t1	1790.51	0.419527	0.327542	0.698805	1	0
L203_101129-t1	66089.8	-0.35813	0.362574	0.0922751	1	0
L203_101130-t1	1015.02	0.208577	0.556424	0.610662	1	0
L203_101131-t1	3224.96	0.518643	0.146381	0.96172	1	0
L203_101132-t1	55402.2	0.545813	0.395905	0.734196	1	0
L203_101133-t1	2989.69	-1.07212	0.055231	-0.706995	0	1
L203_101134-t1	3448.28	-0.121472	0.829115	0.130839	1	0
L203_101135-t1	4483.38	-0.283326	0.448765	0.0534867	1	0
L203_101136-t1	53212.2	-0.604546	0.23176	-0.351244	0	1
L203_101137-t1	5548.49	0.72096	0.0507086	1.11053	1	0
L203_101138-t1	6245.18	-0.203058	0.598739	0.128478	1	0
L203_101139-t1	1718.96	0.141392	0.689817	0.540741	1	0
L203_101140-t1	13075.1	-1.13844	9.26078e-06	-0.727981	0	1
L203_101141-t1	1471.35	-0.232569	0.753846	0.27739	1	0
L203_101142-t1	4799.41	-0.996732	0.000418041	-0.613711	0	1
L203_101143-t1	5922.63	-1.79538	0.000634741	-1.25678	0	1
L203_101144-t1	96.569	0.872301	0.219163	1.06919	1	0
L203_101145-t1	7968.79	-0.0626774	0.90237	0.321605	1	0
L203_101146-t1	3209.88	0.893303	0.104633	1.17192	1	0
L203_101147-t1	288.403	-0.391623	0.601203	0.21579	0.999	0.001
L203_101148-t1	8020.8	0.693661	0.0148039	1.04466	1	0
L203_101149-t1	2557.04	0.59531	0.132867	1.01026	1	0
L203_101150-t1	615.52	1.70468	5.68216e-06	2.14085	1	0
L203_101151-t1	5176.99	0.821514	0.04572	1.20831	1	0
L203_101152-t1	4935.97	-0.573411	0.214793	-0.0442962	0.004	0.996
L203_101153-t1	2318.18	-0.302349	0.334792	0.110831	1	0
L203_101154-t1	44167.8	-1.02467	0.0106154	-0.556258	0	1
L203_101155-t1	1879.7	0.193863	0.803019	0.375134	1	0
L203_101156-t1	95.3225	-0.793069	0.136909	-0.395995	0	1
L203_101157-t1	622.214	0.205237	0.6463	0.531109	1	0
L203_101158-t1	883.05	-0.054459	0.943326	0.469584	1	0
L203_101159-t1	4697.27	0.631242	0.0629181	1.03245	1	0
L203_101160-t1	27082.7	-1.22392	0.0243286	-0.651766	0	1
L203_101161-t1	18679.1	-0.92164	0.0443641	-0.590022	0	1
L203_101162-t1	2904.32	-1.4307	0.00476083	-0.979455	0	1
L203_101163-t1	708.379	0.0464831	0.924896	0.503145	1	0
L203_101164-t1	4340.93	0.630006	0.180723	0.923355	1	0
L203_101165-t1	5105.45	-0.206846	0.771896	0.307755	1	0
L203_101166-t1	13498.8	-0.229693	0.608429	0.0834108	1	0
L203_101167-t1	2767.04	-0.117363	0.844907	0.387142	1	0
L203_101168-t1	1644.44	-0.17332	0.815432	0.279709	1	0
L203_101169-t1	1761.6	0.280192	0.539142	0.579904	1	0
L203_101170-t1	2391.04	0.304158	0.577942	0.794769	1	0
L203_101171-t1	4229.85	0.310883	0.550851	0.566143	1	0
L203_101172-t1	190.262	0.564049	0.511497	1.26013	1	0
L203_101173-t1	3445.98	0.540653	0.120391	0.982035	1	0
L203_101174-t1	2628.64	-0.219514	0.747471	0.393823	1	0
L203_101175-t1	3003.95	0.34703	0.551934	0.832096	1	0
L203_101176-t1	2412.49	-0.0134715	0.977819	0.368947	1	0
L203_101177-t1	1558.76	1.29816	0.000226211	1.70662	1	0
L203_101178-t1	819.296	1.53463	0.00011165	1.831	1	0
L203_101179-t1	4535.82	0.00470048	0.990754	0.3284	1	0
L203_101180-t1	1406.18	-0.0410409	0.945498	0.407581	1	0
L203_101181-t1	284.932	0.15736	0.777547	0.431869	1	0
L203_101182-t1	4401.09	1.00559	0.0142928	1.37702	1	0
L203_101183-t1	19247.7	1.30894	0.00721611	1.76838	1	0
L203_101184-t1	708.672	-0.615087	0.494103	0.0773524	0.952	0.048
L203_101185-t1	3114.94	-0.34936	0.486258	-0.0209964	0.164	0.836
L203_101186-t1	2329.07	0.223146	0.665593	0.604441	1	0
L203_101187-t1	2537.16	-0.212467	0.693509	0.196154	1	0
L203_101188-t1	4275.55	0.148498	0.722503	0.509645	1	0
L203_101189-t1	4300.26	-0.661183	0.179416	-0.109481	0	1
L203_101190-t1	1807.61	0.116434	0.828507	0.592589	1	0
L203_101191-t1	9090.87	-0.53966	0.325757	0.0331869	0.999	0.001
L203_101192-t1	3410.42	-0.980401	0.00736603	-0.503766	0	1
L203_101193-t1	60920	-3.12723	2.34196e-13	-2.58056	0	1
L203_101194-t1	45001.9	-3.43624	9.41855e-12	-2.82414	0	1
L203_101195-t1	5336.96	-0.0452103	0.906568	0.315276	1	0
L203_101196-t1	11601	-0.843463	0.0336268	-0.437547	0	1
L203_101197-t1	2348.06	-1.03155	0.105788	-0.688959	0	1
L203_101198-t1	3965.38	-0.107743	0.836777	0.346622	1	0
L203_101199-t1	2659.6	-0.107209	0.836777	0.225226	1	0
L203_101200-t1	2789.49	-0.924157	0.0124939	-0.476454	0	1
L203_101201-t1	5791.36	-0.339784	0.657398	0.290389	1	0
L203_101202-t1	1196.79	1.55397	0.0189531	1.69062	1	0
L203_101203-t1	23625.4	0.391285	0.232701	0.794578	1	0
L203_101204-t1	9915.08	0.0102068	0.980096	0.366398	1	0
L203_101205-t1	48765.1	-1.60196	0.000347155	-1.12947	0	1
L203_101206-t1	12610.3	-0.31795	0.399421	0.145064	1	0
L203_101207-t1	1990.17	-0.154124	0.754393	0.345692	1	0
L203_101208-t1	1601.17	0.821767	0.0609161	1.12365	1	0
L203_101209-t1	7863.1	0.360604	0.194181	0.740306	1	0
L203_101210-t1	2664.99	0.159598	0.705559	0.486436	1	0
L203_101211-t1	407.524	-0.327203	0.453577	0.0400648	0.771	0.229
L203_101212-t1	54.2933	1.92898	0.00626335	2.20777	1	0
L203_101213-t1	6060.89	-0.118123	0.769716	0.291922	1	0
L203_101214-t1	9801.03	0.622139	0.113693	0.994558	1	0
L203_101215-t1	2057.79	0.120963	0.74098	0.492827	1	0
L203_101216-t1	3704.07	-0.573501	0.0900546	-0.211374	0	1
L203_101217-t1	5910.68	0.102413	0.83306	0.493053	1	0
L203_101218-t1	7802.13	0.0680392	0.904212	0.520478	1	0
L203_101219-t1	6823.63	0.173862	0.621922	0.512095	1	0
L203_101220-t1	3780.95	0.34261	0.495991	0.619347	1	0
L203_101221-t1	6042.05	-0.470643	0.239688	-0.000331782	0.507	0.493
L203_101222-t1	1913.17	0.924824	0.0123916	1.2419	1	0
L203_101223-t1	190.537	-0.104389	0.934746	0.663381	1	0
L203_101224-t1	84.2161	1.77853	0.00407408	2.09245	1	0
L203_101225-t1	56.7097	0.546679	0.543755	1.10696	1	0
L203_101226-t1	49.0213	-0.0349071	0.977574	0.523532	0.999	0.001
L203_101227-t1	2904.71	0.163308	0.762285	0.609159	1	0
L203_101228-t1	1583.79	0.277291	0.378051	0.648944	1	0
L203_101229-t1	3437.43	0.949101	0.0063795	1.27365	1	0
L203_101230-t1	2320.44	-1.55143	3.47698e-08	-1.11028	0	1
L203_101231-t1	3357.08	-0.721498	0.0152186	-0.315056	0	1
L203_101232-t1	3611.53	-0.112559	0.763557	0.295359	1	0
L203_101233-t1	2804.89	0.626136	0.180868	0.940422	1	0
L203_101234-t1	2581.41	-0.153578	0.807109	0.101247	1	0
L203_101235-t1	1200.71	1.51537	0.00260864	1.7978	1	0
L203_101236-t1	2257.09	3.69034	3.40741e-10	4.08338	1	0
L203_101237-t1	3931.37	1.25969	0.00683321	1.48245	1	0
L203_101238-t1	2356.39	1.38686	0.00294666	1.73697	1	0
L203_101239-t1	4537.33	-0.613246	0.0350848	-0.264596	0	1
L203_101240-t1	7130.37	-0.202499	0.753369	0.0581364	1	0
L203_101241-t1	328.618	-0.613326	0.33045	-0.109414	0.042	0.958
L203_101242-t1	80.3958	-2.09645	0.000337545	-1.71889	0	1
L203_101243-t1	67.0266	-0.500338	0.565207	-0.157445	0.111	0.889
L203_101244-t1	2802.33	0.25489	0.575168	0.686639	1	0
L203_101245-t1	6889.11	-0.920733	0.221223	-0.231752	0	1
L203_101246-t1	2202.78	0.211641	0.658005	0.666266	1	0
L203_101247-t1	11693	0.544067	0.190536	0.829298	1	0
L203_101248-t1	2767.34	1.89393	2.34297e-07	2.17127	1	0
L203_101249-t1	11067.7	0.718942	0.215139	0.940708	1	0
L203_101251-t1	282.721	0.32096	0.659148	0.639464	1	0
L203_101252-t1	5466.3	-0.228364	0.545407	0.175569	1	0
L203_101253-t1	839.698	0.154302	0.863898	0.475573	1	0
L203_101254-t1	1419.6	0.446878	0.315075	0.734092	1	0
L203_101255-t1	32574.3	-0.113292	0.89107	0.0771473	1	0
L203_101256-t1	2418.35	0.0622584	0.883836	0.406994	1	0
L203_101257-t1	5864.72	-0.471327	0.179416	-0.0523324	0	1
L203_101258-t1	23522.6	0.351772	0.30783	0.785802	1	0
L203_101259-t1	269.448	-0.356471	0.500236	-0.00184547	0.482	0.518
L203_101260-t1	1261.27	0.48933	0.363815	0.767129	1	0
L203_101261-t1	357.676	0.563741	0.134294	0.899075	1	0
L203_101262-t1	1951.01	0.967828	0.112666	1.20371	1	0
L203_101263-t1	4867.15	-0.297767	0.354253	0.050244	0.999	0.001
L203_101264-t1	1256.3	-0.536089	0.29257	-0.143119	0	1
L203_101265-t1	36494.7	-0.931576	0.000508539	-0.556189	0	1
L203_101266-t1	9010.83	0.375867	0.39296	0.809135	1	0
L203_101267-t1	42.5683	0.606054	0.516674	0.890454	1	0
L203_101268-t1	3114.09	-1.54566	0.0148185	-0.852934	0	1
L203_101269-t1	2716.81	0.171366	0.757164	0.530031	1	0
L203_101271-t1	1712.5	0.258993	0.568669	0.696857	1	0
L203_101272-t1	3713.65	-0.327679	0.431232	0.0490452	0.995	0.005
L203_101274-t1	1970.89	-0.458322	0.3805	0.0623152	0.987	0.013
L203_101275-t1	3247.92	-0.148376	0.737433	0.238041	1	0
L203_101276-t1	1757.78	-1.10709	0.0113675	-0.598079	0	1
L203_101277-t1	5965.19	-1.38067	0.00601826	-1.11489	0	1
L203_101278-t1	9792.05	0.672874	0.0685509	0.963445	1	0
L203_101279-t1	1458.7	0.266996	0.679799	0.482631	1	0
L203_101280-t1	19968.6	0.00371186	0.995064	0.595265	1	0
L203_101281-t1	10460.4	-0.181683	0.712521	0.128782	1	0
L203_101282-t1	132200	-1.54913	0.00180687	-0.956599	0	1
L203_101283-t1	39983.8	-0.811256	0.0615952	-0.421382	0	1
L203_101284-t1	901.838	0.793424	0.0837898	1.04798	1	0
L203_101285-t1	1159.3	-0.0990195	0.907145	0.423105	1	0
L203_101286-t1	2169.16	-0.0366598	0.940575	0.420261	1	0
L203_101287-t1	9566.23	0.108842	0.816543	0.464396	1	0
L203_101288-t1	21542.4	0.254965	0.42844	0.611711	1	0
L203_101289-t1	3686.77	-0.509914	0.0960493	-0.108571	0	1
L203_101290-t1	2594.1	0.642172	0.287638	0.890898	1	0
L203_101291-t1	1114.34	1.71764	0.00294211	2.14	1	0
L203_101292-t1	7177.68	0.765575	0.0931845	1.0267	1	0
L203_101293-t1	4129.76	0.585105	0.165823	1.06772	1	0
L203_101294-t1	4124.08	0.974601	0.0244196	1.30853	1	0
L203_101295-t1	5252.75	-0.657111	0.0216293	-0.240632	0	1
L203_101296-t1	1330.91	0.0305623	0.970743	0.561018	1	0
L203_101297-t1	2871.39	0.382611	0.493925	0.666975	1	0
L203_101298-t1	3403.97	1.521	0.000163535	1.8639	1	0
L203_101299-t1	1366.38	0.218602	0.723649	0.505108	1	0
L203_101300-t1	5949.92	0.878495	0.0261806	1.26598	1	0
L203_101301-t1	16345.9	-1.81489	1.73008e-07	-1.39016	0	1
L203_101302-t1	1500.96	0.146306	0.772881	0.421113	1	0
L203_101303-t1	5754.33	0.381584	0.368805	0.764881	1	0
L203_101304-t1	3407.22	-1.62668	2.37949e-05	-1.12967	0	1
L203_101305-t1	5804.65	-2.20643	1.34292e-07	-1.64685	0	1
L203_101306-t1	1912.4	-0.668363	0.20918	-0.204015	0	1
L203_101307-t1	3110.71	-0.319523	0.634507	-0.042126	0.02	0.98
L203_101308-t1	1994.72	1.32482	1.50506e-06	1.66622	1	0
L203_101309-t1	1875.96	-0.688519	0.431962	0.0756832	0.994	0.006
L203_101310-t1	10653.7	-1.75042	0.0296497	-0.958687	0	1
L203_101311-t1	5580.2	0.00787943	0.985294	0.379	1	0
L203_101312-t1	18092.8	-1.09022	0.04572	-0.482363	0	1
L203_101313-t1	9449.04	0.109121	0.810844	0.40402	1	0
L203_101314-t1	6742.15	-0.98348	0.00845146	-0.490354	0	1
L203_101315-t1	3948.42	-0.229071	0.653428	0.287319	1	0
L203_101316-t1	61.4475	-1.17292	0.0950144	-0.695834	0	1
L203_101317-t1	3772.9	0.320156	0.510774	0.797171	1	0
L203_101318-t1	6484.44	-0.909398	0.00101777	-0.517457	0	1
L203_101319-t1	3962.72	0.205211	0.709645	0.633487	1	0
L203_101320-t1	647.047	0.332855	0.660387	0.504061	1	0
L203_101321-t1	2418.55	0.860152	0.178411	1.0257	1	0
L203_101322-t1	1579.53	-0.690149	0.17228	-0.287035	0	1
L203_101323-t1	3270.51	-0.160508	0.760039	0.353888	1	0
L203_101324-t1	11605.3	0.338095	0.53203	0.762349	1	0
L203_101325-t1	656.608	0.141728	0.760759	0.592856	1	0
L203_101326-t1	2206.75	-1.34499	0.0231141	-1.03701	0	1
L203_101327-t1	3110.77	0.222926	0.513233	0.62338	1	0
L203_101328-t1	5242.75	-0.347201	0.627895	-0.0263468	0.044	0.956
L203_101329-t1	5936.58	0.0876822	0.829352	0.482838	1	0
L203_101330-t1	1650.62	-0.213584	0.579817	0.112233	0.999	0.001
L203_101331-t1	1600.39	0.121955	0.808864	0.481113	1	0
L203_101332-t1	16274.6	-2.34553	5.01918e-08	-1.79561	0	1
L203_101333-t1	8650.71	-0.623498	0.314128	-0.389126	0	1
L203_101334-t1	3070.08	0.0570621	0.905771	0.354915	1	0
L203_101335-t1	48457.7	-0.353513	0.633413	-0.0322278	0	1
L203_101336-t1	25159	0.879496	0.0145503	1.16329	1	0
L203_101337-t1	3431.7	-0.392748	0.438558	0.14479	1	0
L203_101338-t1	15648.7	1.27696	0.0017414	1.60688	1	0
L203_101339-t1	12851.2	0.331587	0.591584	0.664319	1	0
L203_101340-t1	4825.34	0.783341	0.00270698	1.14778	1	0
L203_101341-t1	4037.54	-0.442026	0.266294	-0.113434	0	1
L203_101342-t1	9933.43	-0.194088	0.673038	0.126643	1	0
L203_101343-t1	1332.72	-1.25709	0.000203159	-0.855631	0	1
L203_101344-t1	6078.63	0.539449	0.304964	0.957551	1	0
L203_101345-t1	2889.32	0.812327	0.0143439	1.13229	1	0
L203_101346-t1	2678.94	0.805492	0.118678	1.04128	1	0
L203_101347-t1	2373.13	0.153112	0.749041	0.499854	1	0
L203_101348-t1	4240.9	-0.778107	0.161633	-0.171783	0	1
L203_101349-t1	1880.9	0.084898	0.868167	0.431559	1	0
L203_101350-t1	63550.2	-2.19278	3.61002e-12	-1.79967	0	1
L203_101351-t1	8004.59	-2.13867	1.07282e-15	-1.74439	0	1
L203_101352-t1	2334.66	-0.404212	0.229546	-0.0272673	0.106	0.894
L203_101353-t1	6951.42	0.08461	0.85504	0.551787	1	0
L203_101354-t1	3797.25	1.21129	0.000903466	1.61203	1	0
L203_101355-t1	18868.3	0.59034	0.311781	0.782643	1	0
L203_101356-t1	13970.1	-0.587662	0.0878188	-0.220491	0	1
L203_101357-t1	2753.94	0.296562	0.499519	0.59366	1	0
L203_101358-t1	41335.5	-1.59721	2.92998e-11	-1.23267	0	1
L203_101359-t1	4397.24	0.720269	0.0954263	1.11066	1	0
L203_101360-t1	2670.39	0.266646	0.809016	0.498639	1	0
L203_101361-t1	8835.67	-0.552941	0.111035	-0.11458	0	1
L203_101362-t1	5334.69	-0.671858	0.21699	-0.0832338	0	1
L203_101363-t1	1985.01	-1.09175	0.00173185	-0.688118	0	1
L203_101364-t1	2651.15	0.424049	0.184289	0.778099	1	0
L203_101365-t1	7487.47	-0.0929539	0.836777	0.280897	1	0
L203_101366-t1	6250.48	0.43377	0.246682	0.782685	1	0
L203_101367-t1	2924.76	-0.743814	0.417233	-0.546828	0	1
L203_101368-t1	13183.1	-0.230848	0.595048	0.243169	1	0
L203_101369-t1	4517.91	-0.328359	0.473623	0.178058	1	0
L203_101370-t1	4680.23	-0.170949	0.793144	0.33057	1	0
L203_101371-t1	635.051	0.689495	0.0250793	1.04902	1	0
L203_101372-t1	56177.6	-1.59433	7.03655e-08	-1.13903	0	1
L203_101373-t1	2925.8	-1.78493	0.00804106	-1.24325	0	1
L203_101374-t1	3599.19	0.155974	0.776159	0.634454	1	0
L203_101375-t1	3709.23	0.0693146	0.86293	0.453691	1	0
L203_101376-t1	7032.66	-1.29521	0.0176356	-0.666711	0	1
L203_101377-t1	13341	0.156565	0.780567	0.467759	1	0
L203_101378-t1	924.502	0.301419	0.604259	0.705465	1	0
L203_101379-t1	8605.81	0.960412	0.00431797	1.25725	1	0
L203_101380-t1	1346.5	0.547447	0.215051	1.01888	1	0
L203_101381-t1	1692.47	1.00355	0.0941662	1.60774	1	0
L203_101382-t1	2747.33	0.792581	0.121385	1.01021	1	0
L203_101383-t1	2262.16	0.0335979	0.960238	0.572201	1	0
L203_101384-t1	12246.2	-0.0181096	0.970715	0.391207	1	0
L203_101385-t1	3762.68	-0.407939	0.190536	-0.0272673	0.077	0.923
L203_101386-t1	2345.6	0.402555	0.328825	0.848398	1	0
L203_101387-t1	768.597	1.59858	1.52303e-05	1.89102	1	0
L203_101388-t1	7709.71	0.616744	0.0722949	1.01353	1	0
L203_101389-t1	1323.19	0.853826	0.0436352	1.14637	1	0
L203_101390-t1	1282.68	-0.231996	0.739915	-0.0100207	0.369	0.631
L203_101391-t1	1435.64	-0.648091	0.226716	-0.405263	0	1
L203_101392-t1	1121.28	-0.109614	0.770975	0.248741	1	0
L203_101393-t1	68590.2	-1.21122	0.0176587	-0.708152	0	1
L203_101394-t1	3037.02	-1.32319	0.000247466	-0.893774	0	1
L203_101395-t1	24588	-2.30885	1.2253e-09	-1.78361	0	1
L203_101396-t1	2500.03	0.373347	0.381705	0.680945	1	0
L203_101397-t1	3096.05	-0.410457	0.412132	-0.0604625	0.001	0.999
L203_101398-t1	4891.34	0.196143	0.686122	0.576541	1	0
L203_101399-t1	1015.02	-0.277106	0.740328	0.0376071	0.859	0.141
L203_101400-t1	1928.75	-0.289347	0.503818	0.184915	1	0
L203_101401-t1	10271.5	-0.326156	0.592878	0.269297	1	0
L203_101402-t1	2487.57	0.403471	0.155377	0.786237	1	0
L203_101403-t1	1141.92	0.215999	0.757839	0.561145	1	0
L203_101404-t1	491.453	-0.408534	0.459848	0.0670053	0.898	0.102
L203_101405-t1	2937.14	-0.719087	0.0198462	-0.318114	0	1
L203_101406-t1	3826.14	-0.10117	0.83723	0.392856	1	0
L203_101407-t1	2344.51	1.87149	0.000583783	2.21071	1	0
L203_101408-t1	282.222	2.54939	1.59197e-07	2.7807	1	0
L203_101409-t1	7500.97	-0.380656	0.45725	0.04459	0.999	0.001
L203_101410-t1	3395.64	0.146656	0.781657	0.628372	1	0
L203_101411-t1	1388.23	-0.181257	0.771896	0.2467	1	0
L203_101412-t1	1004.43	-0.995124	0.00402067	-0.55912	0	1
L203_101413-t1	4350.12	0.0646426	0.923346	0.335803	1	0
L203_101414-t1	5772.71	-0.845251	0.0836334	-0.461309	0	1
L203_101415-t1	15617.6	0.522927	0.362213	0.99213	1	0
L203_101417-t1	309.9	2.80624	5.83401e-07	3.0831	1	0
L203_101418-t1	16631.2	-0.620054	0.0861395	-0.322817	0	1
L203_101419-t1	3960.81	0.728739	0.068097	1.03579	1	0
L203_101420-t1	17635.5	-0.87067	0.000831556	-0.496432	0	1
L203_101421-t1	11165.5	-1.88533	1.27194e-07	-1.39273	0	1
L203_101422-t1	2555.93	0.151532	0.72728	0.576348	1	0
L203_101423-t1	2649.35	-1.56706	0.00110758	-1.15079	0	1
L203_101424-t1	3138.71	-0.385407	0.446124	0.00904613	0.627	0.373
L203_101425-t1	6610.34	1.67954	3.16816e-06	1.9632	1	0
L203_101426-t1	91229.4	0.281638	0.712521	0.886441	1	0
L203_101427-t1	1833.49	-0.072218	0.863898	0.318022	1	0
L203_101428-t1	1923.98	-0.682332	0.178411	-0.404325	0	1
L203_101429-t1	2894.82	-0.42649	0.185913	-0.0425323	0.026	0.974
L203_101430-t1	1482.21	0.660898	0.135079	0.918974	1	0
L203_101431-t1	2000.22	0.0454872	0.917908	0.39811	1	0
L203_101432-t1	1954.8	-0.00440285	0.99083	0.321974	1	0
L203_101434-t1	5800.41	-1.30173	0.017776	-1.03726	0	1
L203_101435-t1	5103.82	0.492554	0.313286	0.771564	1	0
L203_101436-t1	3359.55	0.071564	0.836109	0.449207	1	0
L203_101437-t1	2555.89	0.737259	0.0174591	1.12681	1	0
L203_101438-t1	8439.48	0.629921	0.123068	0.906336	1	0
L203_101439-t1	6589.73	0.128301	0.845811	0.338521	1	0
L203_101440-t1	2470.98	-0.161443	0.722503	0.2642	1	0
L203_101441-t1	2452.46	0.712482	0.0180521	1.04502	1	0
L203_101442-t1	1594.37	-0.263348	0.551976	0.124262	1	0
L203_101443-t1	7268.48	0.327106	0.406216	0.768663	1	0
L203_101444-t1	3122.1	-0.775172	0.00733738	-0.357034	0	1
L203_101445-t1	373537	-3.7814	7.51095e-27	-3.35664	0	1
L203_101446-t1	35631.5	-2.96904	3.25409e-16	-2.44944	0	1
L203_101447-t1	1689.08	0.492443	0.457696	0.69521	1	0
L203_101448-t1	9317.08	-1.60295	1.95178e-07	-1.29942	0	1
L203_101449-t1	3079.42	-2.76038	4.03624e-09	-2.23758	0	1
L203_101450-t1	2741.09	-0.0611414	0.917249	0.228751	1	0
L203_101451-t1	1169.86	-0.932675	0.0306296	-0.606641	0	1
L203_101452-t1	5125.42	0.527013	0.285482	0.996888	1	0
L203_101453-t1	2855.76	1.38508	0.000907286	1.64516	1	0
L203_101454-t1	1870.52	1.1796	0.000752807	1.51168	1	0
L203_101455-t1	3181.7	-0.544246	0.140559	-0.236413	0	1
L203_101456-t1	3812.84	-1.98633	4.78719e-07	-1.4509	0	1
L203_101457-t1	2712.71	0.191891	0.789172	0.804929	1	0
L203_101458-t1	1310.12	-1.26642	0.00201138	-0.747319	0	1
L203_101459-t1	7688.18	0.237157	0.591422	0.704049	1	0
L203_101460-t1	15438.6	-0.525017	0.131793	-0.08003	0	1
L203_101461-t1	3066	0.858142	0.0597216	1.36492	1	0
L203_101462-t1	5709.52	0.29422	0.594403	0.751369	1	0
L203_101463-t1	4721.79	0.392428	0.269648	0.785509	1	0
L203_101464-t1	233.007	-1.28646	0.121832	-0.588354	0	1
L203_101465-t1	3565.06	0.532658	0.269703	0.970375	1	0
L203_101466-t1	4036.95	0.43315	0.400747	0.880356	1	0
L203_101467-t1	5121.83	0.407566	0.178881	0.763981	1	0
L203_101468-t1	27010.7	0.425636	0.233093	0.767587	1	0
L203_101469-t1	239.35	-0.293364	0.707764	0.209628	1	0
L203_101470-t1	85378.2	-0.487588	0.256678	0.0170952	1	0
L203_101471-t1	2206.14	0.343393	0.320282	0.695495	1	0
L203_101472-t1	2595.09	-0.588278	0.0578255	-0.16319	0	1
L203_101473-t1	1216.57	-0.81891	0.0379157	-0.378256	0	1
L203_101474-t1	6058.18	0.00641057	0.990697	0.309747	1	0
L203_101475-t1	30126	-1.70491	3.63928e-05	-1.28985	0	1
L203_101476-t1	2357.4	1.10186	0.000713874	1.47303	1	0
L203_101477-t1	28675.8	-2.8664	6.67046e-20	-2.42257	0	1
L203_101478-t1	2259.62	-0.738897	0.211556	-0.460166	0	1
L203_101479-t1	151.457	0.303183	0.65525	0.620286	1	0
L203_101480-t1	4022.6	-0.346821	0.287747	0.0154833	0.806	0.194
L203_101481-t1	3618.76	-0.875596	0.0605326	-0.498598	0	1
L203_101482-t1	5699.47	0.198579	0.802238	0.736873	1	0
L203_101483-t1	4424.72	-0.62515	0.0524852	-0.264008	0	1
L203_101484-t1	5180.63	-1.58974	3.68451e-11	-1.20742	0	1
L203_101485-t1	1921.34	0.0994038	0.799493	0.475645	1	0
L203_101486-t1	17158	-0.904096	0.0646784	-0.339217	0	1
L203_101487-t1	5951.2	-2.16863	NA	-1.31998	0	1
L203_101488-t1	2916	-0.00330915	0.9939	0.308978	1	0
L203_101489-t1	3651.24	0.609604	0.201805	0.917562	1	0
L203_101490-t1	52949.1	-0.417821	0.181358	-0.0714057	0	1
L203_101491-t1	12583.2	0.574923	0.254269	1.041	1	0
L203_101492-t1	2007.94	-0.953181	0.00743455	-0.537564	0	1
L203_101493-t1	8860.52	0.139347	0.711417	0.554196	1	0
L203_101494-t1	2861.4	0.085234	0.833122	0.45346	1	0
L203_101495-t1	6896.46	1.37884	0.000684713	1.63457	1	0
L203_101496-t1	11372.6	-0.75082	0.0854351	-0.456207	0	1
L203_101497-t1	2391.59	-0.464163	0.312447	-0.106214	0	1
L203_101498-t1	2324.96	-0.830557	0.00331923	-0.426082	0	1
L203_101499-t1	3198.74	0.0956386	0.844907	0.416764	1	0
L203_101500-t1	7166.28	1.75192	0.00117787	1.92577	1	0
L203_101501-t1	40135.6	0.946166	0.0356943	1.30594	1	0
L203_101502-t1	3898.93	-1.08715	0.0566064	-0.62812	0	1
L203_101503-t1	5231.44	1.86649	5.10883e-09	2.28844	1	0
L203_101504-t1	1514.25	0.308283	0.443856	0.658874	1	0
L203_101505-t1	7380.55	-0.458324	0.209391	-0.122421	0	1
L203_101506-t1	5762.23	-0.0622704	0.899986	0.236535	1	0
L203_101507-t1	2940.51	-0.311809	0.3603	0.0659996	0.999	0.001
L203_101508-t1	5979.59	0.392204	0.267607	0.726657	1	0
L203_101509-t1	4498.65	0.789945	0.102525	1.26816	1	0
L203_101510-t1	1985.62	1.42628	0.000442979	1.71518	1	0
L203_101511-t1	312.291	0.489697	0.354167	0.778234	1	0
L203_101512-t1	4016.76	-0.145453	0.768144	0.159448	1	0
L203_101513-t1	1462.8	-0.116457	0.870294	0.151924	1	0
L203_101514-t1	3886.18	0.620651	0.210602	1.17344	1	0
L203_101515-t1	14129.7	0.0131166	0.973354	0.394931	1	0
L203_101516-t1	20651.7	-0.781572	0.0226714	-0.441356	0	1
L203_101517-t1	2040.95	-0.502963	0.525701	0.138985	1	0
L203_101518-t1	1162.76	0.129658	0.855848	0.640214	1	0
L203_101519-t1	5639.9	-0.894584	0.012785	-0.514541	0	1
L203_101520-t1	9621.07	-0.0707151	0.905347	0.426662	1	0
L203_101521-t1	11457.4	-0.40988	0.302895	0.0029257	0.592	0.408
L203_101522-t1	5357.28	-0.439561	0.400264	0.108772	1	0
L203_101523-t1	27371.3	1.21991	0.00516113	1.45665	1	0
L203_101525-t1	2182.93	0.281425	0.711417	0.770237	1	0
L203_101526-t1	2140.31	0.262673	0.710486	0.869942	1	0
L203_101527-t1	3136.76	0.28366	0.578337	0.549649	1	0
L203_101528-t1	4822.09	-0.407429	0.339377	-0.0898506	0	1
L203_101529-t1	8538.06	-0.798308	0.069964	-0.452026	0	1
L203_101530-t1	9364.69	-0.4183	0.381591	-0.156539	0	1
L203_101531-t1	1226.47	0.634773	0.110121	0.96753	1	0
L203_101532-t1	4339.82	0.366463	0.450705	0.862019	1	0
L203_101533-t1	5041.23	0.81383	0.134196	1.225	1	0
L203_101534-t1	28181.5	-0.339095	0.58228	-0.128214	0	1
L203_101535-t1	7039.63	0.0324274	0.937879	0.454229	1	0
L203_101536-t1	4077.03	-2.02838	0.0152186	-1.27582	0	1
L203_101537-t1	3773.62	-0.314515	0.374274	0.0971658	1	0
L203_101538-t1	2560.67	-0.531658	0.308029	-0.0853023	0	1
L203_101539-t1	3530.24	-0.156394	0.696142	0.253808	1	0
L203_101540-t1	1823.87	0.221449	0.568277	0.564593	1	0
L203_101541-t1	2422.28	5.83303	8.76029e-15	6.14265	1	0
L203_101542-t1	4828.79	-0.354349	0.245089	0.000230813	0.488	0.512
L203_101543-t1	1635.46	0.897912	0.0481504	1.17877	1	0
L203_101544-t1	1319.02	1.21199	0.00275945	1.49195	1	0
L203_101545-t1	3913.99	-0.89656	0.0341244	-0.385067	0	1
L203_101546-t1	3936.59	-0.207665	0.618598	0.0926675	1	0
L203_101547-t1	1581.88	-2.60645	3.57441e-07	-2.02005	0	1
L203_101548-t1	2609.76	-0.472413	0.376462	0.0339621	0.923	0.077
L203_101549-t1	1220.81	-0.539858	0.217853	-0.228172	0	1
L203_101550-t1	717.097	0.0201394	0.973668	0.391251	1	0
L203_101551-t1	4723.87	0.6883	0.0477621	1.1101	1	0
L203_101552-t1	2359.66	2.07113	0.000840921	2.70129	1	0
L203_101553-t1	1073.46	2.30553	0.000552603	2.94751	1	0
L203_101554-t1	4398.29	0.624669	0.0761732	0.93259	1	0
L203_101555-t1	12468.7	-0.50279	0.430115	0.126788	1	0
L203_101556-t1	6556.77	0.784955	0.0960074	1.059	1	0
L203_101557-t1	4174.13	4.63419	5.87641e-58	4.9619	1	0
L203_101558-t1	19730.7	3.48756	3.91625e-21	3.75929	1	0
L203_101559-t1	698.999	1.09967	0.00787458	1.56449	1	0
L203_101560-t1	1790.44	0.481456	0.115505	0.893983	1	0
L203_101561-t1	4324.57	0.556078	0.205858	1.02104	1	0
L203_101562-t1	329.068	0.431946	0.470538	0.901587	1	0
L203_101563-t1	9525.48	0.932917	0.00759299	1.37953	1	0
L203_101564-t1	133.045	1.69868	0.0111599	2.04043	1	0
L203_101565-t1	6854.47	-0.233582	0.685619	0.320981	1	0
L203_101566-t1	2662.6	-0.0503803	0.929551	0.317559	1	0
L203_101567-t1	73111.5	-0.446199	0.310717	-0.179282	0	1
L203_101568-t1	1252.19	0.559588	0.239688	1.04308	1	0
L203_101569-t1	3029.13	-0.987531	0.00448852	-0.612739	0	1
L203_101570-t1	2951.91	0.167881	0.829221	0.722422	1	0
L203_101571-t1	2959.28	-0.281874	0.417936	0.109575	1	0
L203_101572-t1	1791.37	-0.0304314	0.957379	0.421802	1	0
L203_101573-t1	1906.4	0.407276	0.311974	0.700999	1	0
L203_101574-t1	4857.22	0.797844	0.0574446	1.08296	1	0
L203_101575-t1	2702.8	1.2219	0.00255076	1.63583	1	0
L203_101576-t1	5109.73	0.583068	0.198239	1.09746	1	0
L203_101577-t1	1881.7	0.772476	0.0954263	1.02105	1	0
L203_101578-t1	251.193	0.297012	0.628748	0.614408	1	0
L203_101579-t1	9922.09	-0.493904	0.491961	-0.145795	0	1
L203_101580-t1	3999.33	-0.86467	0.0348321	-0.423137	0	1
L203_101581-t1	539.672	-1.07103	0.0590108	-0.525006	0	1
L203_101582-t1	3890.86	-0.961976	0.13175	-0.383707	0	1
L203_101583-t1	4282.32	0.532565	0.0966215	0.88797	1	0
L203_101584-t1	1745	0.693514	0.0692147	1.06888	1	0
L203_101585-t1	2162.61	-0.613886	0.304964	-0.161591	0	1
L203_101586-t1	971.793	0.598266	0.235157	0.872451	1	0
L203_101587-t1	2833.54	0.820343	0.109057	1.25898	1	0
L203_101588-t1	2689.2	-0.0624677	0.932926	0.283495	1	0
L203_101589-t1	1858.73	1.08278	0.0344227	1.33231	1	0
L203_101590-t1	4044.77	0.0767298	0.887309	0.565607	1	0
L203_101591-t1	2361.18	0.430216	0.61655	0.704713	1	0
L203_101592-t1	1352.35	0.32114	0.495601	0.64537	1	0
L203_101593-t1	1509.01	0.691662	0.136443	1.01274	1	0
L203_101594-t1	1389.24	-1.0397	0.0107468	-0.524224	0	1
L203_101595-t1	4798.68	0.633834	0.252717	1.00184	1	0
L203_101596-t1	3417.99	-0.968256	0.0469615	-0.576812	0	1
L203_101597-t1	5995.83	0.385151	0.349599	0.803359	1	0
L203_101598-t1	811.017	-0.18736	0.604498	0.191815	1	0
L203_101599-t1	6858.94	-1.10249	0.0142876	-0.548338	0	1
L203_101600-t1	3210.19	1.2745	0.000658828	1.54583	1	0
L203_101601-t1	2318.89	0.314932	0.614786	0.563871	1	0
L203_101602-t1	5481.22	0.112396	0.753621	0.494825	1	0
L203_101603-t1	2965.73	0.629054	0.0284635	0.998044	1	0
L203_101604-t1	4475.75	-0.216329	0.659244	0.289634	1	0
L203_101605-t1	2501.96	-1.15931	0.000155667	-0.711345	0	1
L203_101606-t1	3780.12	0.150528	0.766525	0.434903	1	0
L203_101607-t1	1980.48	-0.220318	0.61345	0.0851799	1	0
L203_101608-t1	2870.34	-0.122972	0.852631	0.227741	1	0
L203_101609-t1	104088	-1.8202	4.24324e-08	-1.34786	0	1
L203_101610-t1	9662.5	-1.4221	0.000220956	-1.00515	0	1
L203_101611-t1	2161.89	-0.298989	0.317962	0.0724214	0.998	0.002
L203_101612-t1	3448.11	-0.0415067	0.929551	0.413161	1	0
L203_101613-t1	13451.4	-1.02488	0.170733	-0.274733	0	1
L203_101614-t1	5321.42	0.266389	0.624718	0.705173	1	0
L203_101615-t1	1602.2	1.01822	0.00021825	1.41015	1	0
L203_101616-t1	8493.42	-0.388278	0.502701	0.163756	1	0
L203_101617-t1	7281.04	-0.12274	0.8845	0.561057	1	0
L203_101618-t1	8495.44	-2.30347	1.29052e-08	-1.75174	0	1
L203_101619-t1	3072.46	-0.408231	0.406818	0.0244757	0.88	0.12
L203_101620-t1	16106.9	-4.00531	3.84246e-14	-3.33919	0	1
L203_101621-t1	6857.47	0.326773	0.306202	0.677594	1	0
L203_101622-t1	14118.4	-0.581985	0.354655	-0.0115529	0.146	0.854
L203_101623-t1	8397.18	-2.09258	9.84931e-07	-1.57573	0	1
L203_101624-t1	7679.47	-0.56561	0.123289	-0.263671	0	1
L203_101625-t1	7672.46	1.28196	0.00233135	1.63625	1	0
L203_101626-t1	4885.77	-0.339891	0.346267	0.023156	0.923	0.077
L203_101627-t1	2008.49	0.0261781	0.955817	0.350395	1	0
L203_101628-t1	2074.7	-0.533172	0.132985	-0.16705	0	1
L203_101629-t1	2206.41	1.02941	0.0234587	1.26882	1	0
L203_101630-t1	4046.97	-0.0827815	0.852631	0.230695	1	0
L203_101631-t1	7409.35	0.419875	0.188181	0.817067	1	0
L203_101632-t1	2936.26	-0.00863134	0.990754	0.335472	1	0
L203_101633-t1	2734.04	-0.301333	0.359509	0.11687	1	0
L203_101634-t1	30745.9	-0.160741	0.828507	0.37352	1	0
L203_101635-t1	4400.67	-1.02768	0.166872	-0.295312	0	1
L203_101636-t1	2341.05	-0.678681	0.354253	-0.0415794	0.065	0.935
L203_101637-t1	10533.6	-0.277641	0.364146	0.123083	1	0
L203_101638-t1	5979.46	-1.12965	0.000859629	-0.655196	0	1
L203_101639-t1	6822.69	0.310617	0.578337	0.54406	1	0
L203_101640-t1	4045.03	0.234206	0.567512	0.578746	1	0
L203_101641-t1	1142.97	-0.0361041	0.957938	0.273993	1	0
L203_101642-t1	2515.82	0.61513	0.161838	0.891551	1	0
L203_101643-t1	1472.94	0.608985	0.0523181	0.95061	1	0
L203_101644-t1	7587.47	0.131632	0.714071	0.529411	1	0
L203_101645-t1	8442.87	0.545591	0.429913	0.856747	1	0
L203_101646-t1	3233.35	-0.267172	0.594234	0.152742	1	0
L203_101647-t1	4290.36	-0.225411	0.670564	0.289244	1	0
L203_101648-t1	3555.28	0.428642	0.214793	0.830799	1	0
L203_101649-t1	1474.82	-0.278656	0.428096	0.134089	1	0
L203_101650-t1	2333.2	-0.221004	0.594877	0.128597	1	0
L203_101651-t1	2596.05	0.290441	0.45042	0.734716	1	0
L203_101652-t1	4014.94	-0.22922	0.573506	0.199789	1	0
L203_101653-t1	3100.53	1.18737	0.00626552	1.57589	1	0
L203_101654-t1	2337.73	-0.294858	0.651377	0.233029	1	0
L203_101655-t1	5960.21	-1.59472	0.0630803	-0.760766	0	1
L203_101656-t1	863.262	-0.0387313	0.957772	0.286207	1	0
L203_101657-t1	7468.4	-0.656191	0.318464	0.00344393	0.57	0.43
L203_101658-t1	3473.61	0.956103	0.0108942	1.33729	1	0
L203_101659-t1	4040.83	-0.508344	0.202455	-0.0760802	0	1
L203_101660-t1	29155.2	-0.430538	0.303575	-0.0483059	0	1
L203_101661-t1	2318.36	0.373682	0.359235	0.66175	1	0
L203_101662-t1	9459.3	-0.603312	0.303178	-0.181942	0	1
L203_101663-t1	2989.8	-1.83151	4.22279e-05	-1.42917	0	1
L203_101664-t1	7408.53	0.266163	0.501767	0.581149	1	0
L203_101665-t1	17002.3	-1.08118	0.0901777	-0.43694	0	1
L203_101666-t1	20864.8	-0.856886	0.0396061	-0.571133	0	1
L203_101667-t1	5364.59	-2.63191	4.3878e-11	-2.1124	0	1
L203_101668-t1	637.81	-2.21452	9.9019e-07	-1.69177	0	1
L203_101669-t1	7600.65	-0.468735	0.333684	-0.215554	0	1
L203_101670-t1	21466.5	-0.991199	0.0010803	-0.549373	0	1
L203_101671-t1	1307.17	0.912217	0.00561568	1.2415	1	0
L203_101672-t1	2487.01	-0.641203	0.0593298	-0.211124	0	1
L203_101673-t1	1547.98	0.132005	0.76847	0.436844	1	0
L203_101674-t1	3389.17	-0.458637	0.523551	-0.0995645	0	1
L203_101675-t1	381.631	-0.495732	0.63521	-0.111806	0.03	0.97
L203_101676-t1	4154.76	-0.512942	0.249352	-0.220701	0	1
L203_101677-t1	8740.66	0.496768	0.15961	0.801887	1	0
L203_101678-t1	379899	-2.55304	2.11451e-19	-2.09832	0	1
L203_101679-t1	39830	0.660292	0.0507146	1.02107	1	0
L203_101680-t1	3937.55	-0.0428756	0.926783	0.322309	1	0
L203_101681-t1	1173.7	0.0712	0.927841	0.703809	1	0
L203_101682-t1	12620.9	0.283016	0.661264	0.485303	1	0
L203_101683-t1	3014.25	-0.406008	0.287159	-0.0299263	0.074	0.926
L203_101684-t1	1808.44	-1.2062	0.13175	-0.716842	0	1
L203_101685-t1	5390.04	-0.651428	0.0251626	-0.241572	0	1
L203_101686-t1	1245.61	0.52125	0.309343	0.973597	1	0
L203_101687-t1	2921.17	-0.812729	0.0202373	-0.514127	0	1
L203_101688-t1	4653.33	0.856145	0.00571792	1.29559	1	0
L203_101689-t1	4399.54	1.20645	0.0089962	1.50611	1	0
L203_101690-t1	1324.97	-0.605528	0.313274	-0.149298	0	1
L203_101691-t1	2874.79	-0.291447	0.482969	0.17904	1	0
L203_101692-t1	3430.59	-1.79607	8.86972e-11	-1.36494	0	1
L203_101694-t1	3088.14	0.202448	0.852846	0.563139	1	0
L203_101695-t1	12187.4	-0.696309	0.0846874	-0.356538	0	1
L203_101696-t1	2760.11	-0.296311	0.579141	0.107326	1	0
L203_101697-t1	3427.53	0.574861	0.0795934	1.02077	1	0
L203_101699-t1	11452	-0.624588	0.37409	-0.325605	0	1
L203_101700-t1	17526.8	-0.40026	0.34227	0.0383378	1	0
L203_101701-t1	682.554	1.88615	0.000173875	2.28271	1	0
L203_101702-t1	5691.56	0.860762	0.0086499	1.26103	1	0
L203_101704-t1	649.852	1.50526	0.000713151	1.93457	1	0
L203_101705-t1	5785.26	0.54008	0.144073	0.952609	1	0
L203_101706-t1	15663.4	-1.74538	4.82614e-08	-1.27884	0	1
L203_101707-t1	3263.87	0.244084	0.490431	0.650369	1	0
L203_101708-t1	646.697	1.04447	0.0484803	1.26115	1	0
L203_101709-t1	1376.5	0.584263	0.299837	1.10082	1	0
L203_101710-t1	4050.39	-3.18332	2.62688e-24	-2.79926	0	1
L203_101711-t1	18117.3	-1.58894	0.00140403	-1.19871	0	1
L203_101712-t1	1841.13	-0.326162	0.448538	0.00171579	0.517	0.483
L203_101713-t1	6535.82	-0.178016	0.8085	0.0524715	1	0
L203_101714-t1	3720.71	1.03269	0.0136012	1.30109	1	0
L203_101715-t1	998.651	1.3788	0.00604809	1.63275	1	0
L203_101716-t1	1415.23	0.562925	0.17263	0.905289	1	0
L203_101717-t1	11609.4	2.92235	5.00351e-30	3.29013	1	0
L203_101718-t1	6296.31	0.0479962	0.905934	0.384392	1	0
L203_101719-t1	11158.6	-0.184401	0.771896	0.278508	1	0
L203_101720-t1	876.092	-0.547006	0.282217	-0.142034	0	1
L203_101721-t1	867.171	0.55247	0.197945	0.987277	1	0
L203_101722-t1	1336.76	-1.87409	0.000974902	-1.21445	0	1
L203_101723-t1	1476.44	0.277071	0.543945	0.656167	1	0
L203_101724-t1	746.059	-0.450153	0.537906	0.203702	1	0
L203_101725-t1	441.731	-0.0554596	0.943643	0.522749	1	0
L203_101726-t1	7575.26	0.662977	0.160516	0.911231	1	0
L203_101727-t1	2334.46	0.516745	0.142903	0.835326	1	0
L203_101728-t1	613.33	1.60865	0.00118679	2.00464	1	0
L203_101729-t1	21145	0.695923	0.313274	0.844305	1	0
L203_101730-t1	19593.7	-0.865524	0.0212533	-0.372406	0	1
L203_101731-t1	4191.01	1.12264	0.000237162	1.46067	1	0
L203_101732-t1	13815.3	0.411498	0.339127	0.773304	1	0
L203_101733-t1	2312.42	0.529339	0.255717	0.901232	1	0
L203_101734-t1	9712.16	0.039069	0.937885	0.4829	1	0
L203_101735-t1	4273.43	0.131981	0.736647	0.456375	1	0
L203_101736-t1	3022.07	-0.311091	0.379431	0.106415	1	0
L203_101737-t1	12703.3	0.949993	0.114665	1.11687	1	0
L203_101738-t1	854.556	0.0820428	0.874993	0.385696	1	0
L203_101739-t1	22107.2	-2.35937	1.15396e-21	-1.98616	0	1
L203_101740-t1	1642.51	0.359018	0.52888	0.593469	1	0
L203_101741-t1	1089.69	-0.0560748	0.94118	0.177267	1	0
L203_101742-t1	1029.17	1.06046	0.0343936	1.30827	1	0
L203_101743-t1	3065.82	1.0919	0.0002286	1.51124	1	0
L203_101744-t1	16694.5	0.138009	0.760759	0.564105	1	0
L203_101745-t1	9616.83	-1.28956	0.0582988	-0.673222	0	1
L203_101746-t1	17428.3	-3.90295	5.31303e-26	-3.36745	0	1
L203_101747-t1	3041.11	-0.100251	0.860677	0.393262	1	0
L203_101748-t1	2981.68	-0.597651	0.0988069	-0.134983	0	1
L203_101749-t1	12274.2	-0.13035	0.790362	0.163653	1	0
L203_101750-t1	1462.51	0.0679132	0.919416	0.302372	1	0
L203_101751-t1	85.4878	-1.38059	0.0893182	-1.07372	0	1
L203_101752-t1	73.448	-1.50694	0.0266022	-1.24439	0	1
L203_101753-t1	5698.86	0.102804	0.848277	0.568606	1	0
L203_101754-t1	3628.18	-0.128391	0.762124	0.268746	1	0
L203_101755-t1	5585.84	0.514945	0.337038	0.737349	1	0
L203_101756-t1	190.054	0.290581	0.755147	0.850767	1	0
L203_101758-t1	2823.54	0.654479	0.0776604	1.01831	1	0
L203_101759-t1	6800.51	0.427091	0.256843	0.751969	1	0
L203_101760-t1	1183.03	0.0105757	0.982124	0.394295	1	0
L203_101761-t1	2920.25	-0.810816	0.0605326	-0.473506	0	1
L203_101762-t1	1229.35	1.301	0.00566718	1.66239	1	0
L203_101763-t1	58912.4	-0.314258	0.321734	0.0380287	1	0
L203_101764-t1	3430.29	-1.79472	9.0757e-11	-1.36227	0	1
L203_101765-t1	2422.59	-0.192153	0.665086	0.28378	1	0
L203_101766-t1	1208.82	-0.40708	0.53203	0.0296154	0.819	0.181
L203_101767-t1	6083.88	-0.540443	0.0762092	-0.124633	0	1
L203_101768-t1	29804.2	0.978458	0.0811573	1.16219	1	0
L203_101769-t1	974.706	-1.93047	1.71411e-05	-1.54031	0	1
L203_101770-t1	4499.27	0.694936	0.140243	1.10403	1	0
L203_101771-t1	948.617	0.913714	0.0152186	1.21266	1	0
L203_101772-t1	6329.63	0.400106	0.22495	0.73167	1	0
L203_101773-t1	3171.81	-0.74822	0.150133	-0.228345	0	1
L203_101774-t1	16614.3	-1.11798	0.0283264	-0.549827	0	1
L203_101775-t1	5666.66	0.0426598	0.95586	0.319306	1	0
L203_101776-t1	4755.86	-0.630179	0.0545077	-0.264224	0	1
L203_101777-t1	7866.66	0.944642	0.0268939	1.44807	1	0
L203_101778-t1	3802.8	-0.493166	0.0974016	-0.140399	0	1
L203_101779-t1	4154.44	-0.774709	0.216423	-0.122938	0	1
L203_101780-t1	2737.34	0.028633	0.955398	0.324626	1	0
L203_101781-t1	4016.21	-0.344983	0.32373	0.0221902	0.877	0.123
L203_101782-t1	3344.35	0.868095	0.010664	1.20103	1	0
L203_101783-t1	2686.69	-1.57949	2.35487e-08	-1.18912	0	1
L203_101784-t1	5851.04	0.014017	0.983481	0.393416	1	0
L203_101785-t1	1327.76	0.44386	0.440775	0.666002	1	0
L203_101786-t1	11955.6	-0.500091	0.321774	0.0152835	0.938	0.062
L203_101787-t1	80450.9	0.890103	0.153362	1.05041	1	0
L203_101788-t1	35294.1	0.671181	0.0145656	1.03204	1	0
L203_101789-t1	10599.8	1.41009	0.00585204	1.60617	1	0
L203_101790-t1	449.456	-1.42127	0.00566277	-0.846048	0	1
L203_101791-t1	1940.18	0.540792	0.0959246	0.921398	1	0
L203_101792-t1	10512.6	0.165686	0.806959	0.769315	1	0
L203_101793-t1	3946.33	0.874661	0.0285169	1.1466	1	0
L203_101794-t1	1206.38	-0.0724705	0.94118	0.659486	1	0
L203_101795-t1	13572.4	-0.875236	0.000741166	-0.472768	0	1
L203_101796-t1	4471.88	1.07083	0.000315267	1.38794	1	0
L203_101797-t1	4447.05	0.3542	0.540686	0.859977	1	0
L203_101798-t1	57.7669	-0.566562	0.638594	0.180721	0.86	0.14
L203_101799-t1	10.2937	-0.295086	0.887416	0.557719	0.932	0.068
L203_101800-t1	3432.39	0.904906	0.0136955	1.24427	1	0
L203_101801-t1	4469.21	-0.599526	0.136726	-0.243194	0	1
L203_101802-t1	3994.62	0.157166	0.739478	0.444731	1	0
L203_101803-t1	3589.05	-0.724545	0.00920504	-0.306811	0	1
L203_101804-t1	1653.7	-1.26313	0.000985666	-0.754819	0	1
L203_101805-t1	4070.17	0.534994	0.0926638	0.955581	1	0
L203_101806-t1	3752.87	0.0766452	0.845811	0.487723	1	0
L203_101807-t1	1944.69	0.303607	0.377741	0.721486	1	0
L203_101808-t1	963.834	-0.00157762	0.996837	0.363687	1	0
L203_101810-t1	2332.2	-0.550357	0.18442	-0.104712	0	1
L203_101811-t1	4793.53	-4.16052	1.08779e-14	-3.57216	0	1
L203_101812-t1	4580.73	0.230538	0.60986	0.526219	1	0
L203_101813-t1	39911.5	1.60351	0.0058109	1.75945	1	0
L203_101814-t1	1882.94	0.0158021	0.986043	0.69732	1	0
L203_101815-t1	9524.67	0.729082	0.0157524	1.14034	1	0
L203_101816-t1	10670.1	-1.88634	1.62921e-14	-1.50229	0	1
L203_101817-t1	23487.1	1.91408	0.000576722	2.15681	1	0
L203_101818-t1	4348.88	0.81198	0.0377042	1.08786	1	0
L203_101819-t1	2457.48	-0.858329	0.0711429	-0.31523	0	1
L203_101820-t1	2449.44	-1.06821	0.000116099	-0.681701	0	1
L203_101821-t1	16095.8	-1.48685	5.50701e-07	-1.06133	0	1
L203_101822-t1	2314.72	1.12345	0.00564902	1.47587	1	0
L203_101823-t1	10650.5	-1.8178	5.76864e-08	-1.33418	0	1
L203_101824-t1	4538.9	0.353078	0.479426	0.609679	1	0
L203_101825-t1	2014.13	0.0939114	0.878458	0.364673	1	0
L203_101826-t1	2858.54	0.321556	0.382096	0.642692	1	0
L203_101827-t1	6275.63	-0.305632	0.452352	0.0511493	1	0
L203_101828-t1	17446.9	-0.174258	0.747316	0.0765865	1	0
L203_101829-t1	3425.32	0.975145	0.0279132	1.21891	1	0
L203_101830-t1	7451.59	0.440087	0.366777	0.683804	1	0
L203_101832-t1	6965.01	-2.34865	6.28675e-20	-1.99709	0	1
L203_101833-t1	5273.62	0.314311	0.406216	0.623314	1	0
L203_101835-t1	6399.5	0.516478	0.191107	0.903347	1	0
L203_101836-t1	1650.22	1.08703	0.0733519	1.31047	1	0
L203_101837-t1	3126.35	-0.627642	0.0601561	-0.208892	0	1
L203_101838-t1	3285.59	-0.08637	0.836109	0.23115	1	0
L203_101839-t1	2560.71	1.07673	0.000209286	1.40704	1	0
L203_101841-t1	1448.06	0.596635	0.287254	0.997704	1	0
L203_101842-t1	13165	-0.559	0.215051	-0.0386469	0	1
L203_101843-t1	3229.11	-0.0878881	0.83306	0.28212	1	0
L203_101844-t1	3546.99	0.894435	0.0101912	1.24236	1	0
L203_101845-t1	4009.75	1.39671	0.000138971	1.67451	1	0
L203_101846-t1	2223.65	0.737411	0.104612	1.05449	1	0
L203_101847-t1	2334.28	-0.104607	0.893252	0.383066	1	0
L203_101848-t1	15316.5	0.706467	0.120251	0.973714	1	0
L203_101849-t1	4453.3	-0.127047	0.722457	0.234967	1	0
L203_101850-t1	26046.9	-1.1712	9.93412e-05	-0.847115	0	1
L203_101851-t1	9526.23	0.582353	0.137591	1.00864	1	0
L203_101852-t1	3977.01	-1.14572	0.000150221	-0.729975	0	1
L203_101853-t1	13135.7	0.446056	0.212104	0.771793	1	0
L203_101854-t1	6809.43	0.91474	0.068155	1.17826	1	0
L203_101855-t1	19565.3	0.332566	0.270766	0.682331	1	0
L203_101856-t1	20954.5	-1.15248	0.000824351	-0.829655	0	1
L203_101857-t1	3989.57	0.378448	0.408427	0.662023	1	0
L203_101858-t1	1504.23	0.272817	0.624718	0.57746	1	0
L203_101859-t1	586.829	1.45976	0.00494135	1.68307	1	0
L203_101860-t1	2755.21	0.274804	0.409357	0.673448	1	0
L203_101861-t1	9196.25	-0.410214	0.322803	-0.123746	0	1
L203_101862-t1	1311.56	0.178598	0.749041	0.67827	1	0
L203_101863-t1	2218.06	0.0860545	0.870528	0.564349	1	0
L203_101864-t1	4854.32	0.0259566	0.950514	0.417661	1	0
L203_101865-t1	2621.97	0.50983	0.223213	0.881993	1	0
L203_101866-t1	4456.49	-0.00965582	0.981405	0.336078	1	0
L203_101867-t1	969.839	0.132574	0.796695	0.455029	1	0
L203_101868-t1	1428.78	0.26759	0.558233	0.56389	1	0
L203_101869-t1	25719.5	0.0293691	0.968474	0.36446	1	0
L203_101870-t1	1950.31	-0.0444387	0.958842	0.170233	1	0
L203_101871-t1	12727	-0.198757	0.581927	0.22504	1	0
L203_101872-t1	3414.75	0.577452	0.191295	0.960267	1	0
L203_101873-t1	2186.99	-0.205054	0.826933	0.133129	1	0
L203_101874-t1	3513.77	0.0224156	0.95962	0.436258	1	0
L203_101875-t1	45742.4	-1.61157	1.28772e-07	-1.1544	0	1
L203_101876-t1	1950.05	-0.240352	0.669364	0.284988	1	0
L203_101877-t1	34946.6	-4.06972	1.70226e-23	-3.76833	0	1
L203_101878-t1	2077.51	0.0214349	0.961283	0.423255	1	0
L203_101879-t1	1032.5	1.24215	0.00318127	1.65115	1	0
L203_101880-t1	2099.17	-0.810514	0.0139873	-0.485427	0	1
L203_101881-t1	96.8042	-1.42801	0.0713666	-0.946574	0	1
L203_101882-t1	4538.57	-0.799043	0.0272305	-0.423255	0	1
L203_101883-t1	2680.33	-0.0615293	0.924896	0.163512	1	0
L203_101884-t1	3117.88	-0.609274	0.154993	-0.295182	0	1
L203_101885-t1	4256.17	-0.653114	0.242998	-0.381926	0	1
L203_101886-t1	4027.49	0.737482	0.0929304	0.991318	1	0
L203_101887-t1	2372.86	-1.0146	0.0150247	-0.491761	0	1
L203_101888-t1	7240.74	-1.88809	4.15818e-05	-1.3088	0	1
L203_101889-t1	5154.02	0.322305	0.408476	0.739623	1	0
L203_101890-t1	11660.7	0.902288	0.0189531	1.19382	1	0
L203_101891-t1	2329.13	0.706734	0.0935093	0.986993	1	0
L203_101892-t1	2740.8	0.0693266	0.914819	0.51927	1	0
L203_101893-t1	7750.52	-0.977802	0.000652434	-0.541822	0	1
L203_101894-t1	3481.11	-1.23052	0.189362	-0.474763	0	1
L203_101895-t1	1775.95	-0.385021	0.414865	-0.00242169	0.477	0.523
L203_101896-t1	32137.2	-1.2853	0.0042085	-0.921581	0	1
L203_101897-t1	80815.2	-0.91593	0.00368147	-0.598422	0	1
L203_101898-t1	228.988	0.0058746	0.99432	0.660226	1	0
L203_101899-t1	7112.22	-1.01169	0.0659758	-0.39939	0	1
L203_101900-t1	1975.9	0.559491	0.0793734	0.896605	1	0
L203_101901-t1	1702.42	0.283581	0.654964	0.533195	1	0
L203_101902-t1	1915.96	-0.154436	0.762251	0.265257	1	0
L203_101903-t1	2830.08	-2.10496	3.23698e-11	-1.64254	0	1
L203_101904-t1	24456.8	-1.18141	0.00747959	-0.634156	0	1
L203_101905-t1	2703.28	-0.7666	0.0354026	-0.317617	0	1
L203_101906-t1	464.773	-0.37721	0.648936	0.0555705	0.844	0.156
L203_101907-t1	434.729	-0.11839	0.852146	0.336283	1	0
L203_101908-t1	284.005	-0.0106849	0.985539	0.423696	1	0
L203_101909-t1	1303.86	-0.497948	0.397025	0.0818168	0.997	0.003
L203_101910-t1	302.794	-1.37254	NA	-0.494344	0	1
L203_101911-t1	7199.04	-1.41985	0.0205054	-0.740392	0	1
L203_101912-t1	3745.15	-0.412863	0.369253	0.0949792	1	0
L203_101913-t1	2028.42	0.705038	0.0768568	1.19886	1	0
L203_101914-t1	4090.75	0.767228	0.15378	1.27482	1	0
L203_101915-t1	1936.33	-0.0715972	0.896288	0.324788	1	0
L203_101916-t1	24915.6	0.263622	0.495991	0.705306	1	0
L203_101917-t1	7243.56	0.0551482	0.90237	0.44349	1	0
L203_101918-t1	1970	1.45013	0.00195078	1.6696	1	0
L203_101919-t1	3549.49	0.101302	0.794516	0.495204	1	0
L203_101920-t1	1255.83	0.351174	0.366692	0.798067	1	0
L203_101921-t1	1989.76	-0.807139	0.22495	-0.229945	0	1
L203_101922-t1	1021.32	-0.316443	0.42636	0.143054	1	0
L203_101923-t1	4488.18	1.79797	5.73165e-06	2.30689	1	0
L203_101924-t1	2612.25	-0.0794364	0.888099	0.320785	1	0
L203_101925-t1	4187.68	-0.454916	0.218086	-0.0251422	0.072	0.928
L203_101926-t1	5202.84	0.330026	0.553812	0.588315	1	0
L203_101927-t1	13452.9	-0.550725	0.0942103	-0.225756	0	1
L203_101928-t1	12544.1	-0.849505	0.0830158	-0.371291	0	1
L203_101929-t1	44289.1	-1.08836	0.0352718	-0.813467	0	1
L203_101930-t1	5951.53	-1.48646	0.0384808	-0.768832	0	1
L203_101931-t1	30229.9	-1.41668	0.0140385	-0.773743	0	1
L203_101932-t1	104676	-0.41912	0.382073	-0.171245	0	1
L203_101933-t1	606.549	-0.101669	0.896288	0.0982174	0.982	0.018
L203_101934-t1	245.221	-0.92767	0.0673135	-0.629053	0	1
L203_101935-t1	454.268	0.0853477	0.865988	0.506084	1	0
L203_101936-t1	44119.1	-0.373948	0.46387	-0.0226732	0	1
L203_101937-t1	2758.27	0.45794	0.360379	0.705067	1	0
L203_101938-t1	5480.22	-0.609109	0.134909	-0.116272	0	1
L203_101939-t1	7654.56	0.00858788	0.983423	0.358666	1	0
L203_101940-t1	1251.82	0.246992	0.495601	0.592005	1	0
L203_101941-t1	4855.39	-2.30346	1.46116e-07	-1.79067	0	1
L203_101942-t1	5150.98	-1.86776	0.000314981	-1.45861	0	1
L203_101943-t1	2810.15	0.244212	0.427584	0.617242	1	0
L203_101944-t1	2340.71	-0.848616	0.101179	-0.515934	0	1
L203_101945-t1	4670.44	-0.28046	0.607071	0.261254	1	0
L203_101946-t1	1466.23	0.0702621	0.898048	0.56548	1	0
L203_101947-t1	7991.57	1.22266	5.17433e-06	1.57432	1	0
L203_101948-t1	7026.44	-0.891913	0.0858324	-0.304371	0	1
L203_101949-t1	6391.33	-0.806256	0.0268058	-0.326319	0	1
L203_101950-t1	3183.7	0.252819	0.433939	0.616217	1	0
L203_101951-t1	13378.7	2.44638	1.32012e-11	2.72745	1	0
L203_101952-t1	3664.66	0.110763	0.870293	0.49252	1	0
L203_101953-t1	10513.7	-0.270842	0.498867	0.1503	1	0
L203_101954-t1	3616.48	-0.13081	0.816989	0.399991	1	0
L203_101955-t1	20617.3	-0.996805	0.0107353	-0.515258	0	1
L203_101956-t1	487.842	-1.15341	0.00651552	-0.677287	0	1
L203_101957-t1	96369.9	-2.63904	0.000113578	-1.86549	0	1
L203_101958-t1	2461.64	-0.886275	0.186004	-0.231445	0	1
L203_101959-t1	4427.89	0.135441	0.703693	0.549028	1	0
L203_101960-t1	6889.8	0.35017	0.330452	0.667029	1	0
L203_101961-t1	1001.13	1.58685	0.00242727	1.83935	1	0
L203_101962-t1	8440.03	0.686197	0.0345265	1.09367	1	0
L203_101963-t1	2590.88	-0.746809	0.100779	-0.351402	0	1
L203_101964-t1	2247.94	-0.894693	0.0219918	-0.48519	0	1
L203_101965-t1	5515.8	-2.07775	0.00034678	-1.40721	0	1
L203_101966-t1	549.354	1.31752	0.0137812	1.90564	1	0
L203_101967-t1	3402.56	0.433476	0.330016	0.903856	1	0
L203_101968-t1	55559.3	0.231671	0.719786	0.778806	1	0
L203_101969-t1	4521.42	1.03288	0.0188897	1.3913	1	0
L203_101970-t1	2485.84	-0.82698	0.0172044	-0.518847	0	1
L203_101971-t1	2832.87	0.153162	0.803249	0.696857	1	0
L203_101972-t1	1741.38	-0.548579	0.295385	-0.253844	0	1
L203_101973-t1	7918.23	-1.43331	1.11709e-07	-1.09666	0	1
L203_101974-t1	2509.97	-1.4904	0.000181634	-1.08234	0	1
L203_101975-t1	1321.59	0.241495	0.621134	0.513855	1	0
L203_101977-t1	13161.8	0.460954	0.374567	0.874923	1	0
L203_101978-t1	6853.22	1.64189	0.00158868	1.83234	1	0
L203_101979-t1	2316.92	-0.535758	0.274672	-0.11059	0	1
L203_101980-t1	9108.94	0.0475095	0.930222	0.363799	1	0
L203_101981-t1	7316.29	0.418231	0.379385	0.695415	1	0
L203_101982-t1	3139.03	0.993324	0.0303498	1.34948	1	0
L203_101983-t1	2501.11	0.800908	0.0473653	1.06979	1	0
L203_101984-t1	1675.6	-0.543252	0.313274	-0.136677	0	1
L203_101985-t1	5449.89	0.347299	0.51367	0.64655	1	0
L203_101986-t1	14411.4	0.886534	0.0311186	1.23643	1	0
L203_101987-t1	34856.8	0.194723	0.735405	0.431869	1	0
L203_101988-t1	5894.17	-0.762149	0.23019	-0.108384	0	1
L203_101989-t1	5450.82	-0.092045	0.818559	0.301131	1	0
L203_101990-t1	2576.68	0.755823	0.0166654	1.11189	1	0
L203_101991-t1	6069.78	1.51883	1.68599e-07	1.866	1	0
L203_101992-t1	61999	-0.744412	0.184643	-0.143968	0	1
L203_101993-t1	25579.7	0.373431	0.29172	0.787123	1	0
L203_101994-t1	456.011	-1.69304	0.024569	-1.07011	0	1
L203_101995-t1	4718.16	-0.360898	0.516738	-0.0240076	0.063	0.937
L203_101996-t1	9259.94	-0.533002	0.229546	-0.149676	0	1
L203_101997-t1	4914.82	-0.8937	0.00422188	-0.488741	0	1
L203_101998-t1	5590.56	-0.10904	0.819834	0.328319	1	0
L203_101999-t1	7121.9	-0.334221	0.46387	0.064607	1	0
L203_102000-t1	1076.06	0.0870915	0.904212	0.342122	1	0
L203_102001-t1	5993.79	-0.551412	0.0805988	-0.221555	0	1
L203_102002-t1	1678.95	-2.28894	2.57459e-13	-1.8358	0	1
L203_102003-t1	18291.7	0.0765499	0.899813	0.322597	1	0
L203_102004-t1	3476.56	0.410258	0.218822	0.78115	1	0
L203_102005-t1	3500.29	-0.312449	0.600433	-0.0751218	0	1
L203_102007-t1	5183.89	2.20883	7.43363e-10	2.55098	1	0
L203_102008-t1	4180.38	0.0784678	0.833122	0.480999	1	0
L203_102009-t1	943.703	0.650088	0.0779627	0.959221	1	0
L203_102010-t1	33.8381	0.287796	0.745123	0.666657	1	0
L203_102011-t1	1016.21	-0.190693	0.662618	0.229219	1	0
L203_102012-t1	8911.01	0.00465669	0.995064	0.684119	1	0
L203_102013-t1	2720.75	-0.485596	0.327542	0.0162253	0.747	0.253
L203_102014-t1	2505.02	0.0724816	0.920418	0.629324	1	0
L203_102015-t1	2454.58	-0.109802	0.878906	0.116258	1	0
L203_102016-t1	5621.14	0.0811804	0.873336	0.477967	1	0
L203_102017-t1	31676.6	-1.19849	0.00196856	-0.923971	0	1
L203_102018-t1	3040.19	0.20945	0.687324	0.487795	1	0
L203_102019-t1	3822.21	0.418687	0.381705	0.908713	1	0
L203_102020-t1	7674.11	-0.257858	0.711857	0.370432	1	0
L203_102021-t1	1190.12	-2.10078	0.000101909	-1.47436	0	1
L203_102022-t1	7832.48	-0.325664	0.386352	0.0177652	0.915	0.085
L203_102023-t1	2259.86	-0.921114	0.00787458	-0.475541	0	1
L203_102024-t1	4996.06	-0.0439103	0.951668	0.495327	1	0
L203_102025-t1	3709.03	0.645557	0.0304543	1.0364	1	0
L203_102026-t1	1405.3	-0.658527	0.251054	-0.0597983	0.037	0.963
L203_102027-t1	6421.59	-0.718626	0.0719768	-0.219872	0	1
L203_102028-t1	3115.16	-0.128628	0.796983	0.304102	1	0
L203_102029-t1	8889	0.0753275	0.892302	0.336992	1	0
L203_102030-t1	76.2744	0.666273	0.511796	1.15608	1	0
L203_102031-t1	5701.93	1.23613	0.000191038	1.60179	1	0
L203_102032-t1	11880.6	-0.580505	0.154201	-0.141433	0	1
L203_102033-t1	11294.1	-1.55438	1.32365e-05	-1.1877	0	1
L203_102034-t1	3986.46	-0.966661	0.0514278	-0.502697	0	1
L203_102035-t1	1405.31	1.33176	0.000286396	1.61506	1	0
[truncated: 4,345 more rows]

## Sheet: CBS7855_expression
Figure 3–source data 2. C. depauperatus gene expression analysis comparing sporulation (solid) vs. non-sporulation (liquid) conditions.
Cryptococcus depauperatus CBS7855
locus_tag	DESeq2 base Mean	DESeq2_log2 FC (solid_vs_liquid)	DESeq2_padj	LOX_log2FC (solid_vs_liquid)	LOX_P (solid>liquid)	LOX_P (liquid>solid)
L204_100001-t1	2042.88	-2.309	3.12165e-67	-1.91132	0	1
L204_100002-t1	364.916	0.363461	0.098308	0.768739	1	0
L204_100003-t1	90.846	-0.104362	0.742314	0.315589	0.997	0.003
L204_100004-t1	2035.51	1.26463	1.78561e-12	1.63607	1	0
L204_100005-t1	35.5556	1.33518	0.000870465	1.73063	1	0
L204_100006-t1	77.2775	1.08531	0.000173368	1.48341	1	0
L204_100007-t1	511.525	0.343086	0.0409706	0.73332	1	0
L204_100008-t1	219.577	0.531081	0.00969167	0.935098	1	0
L204_100009-t1	36.0699	-0.0752193	0.862572	0.322032	0.935	0.065
L204_100010-t1	266.588	0.949012	4.42182e-06	1.34077	1	0
L204_100011-t1	1135.47	-0.28063	0.055856	0.107768	0.999	0.001
L204_100012-t1	4936.19	0.926584	2.07291e-10	1.32769	1	0
L204_100013-t1	5156.86	0.996044	2.58185e-12	1.38779	1	0
L204_100014-t1	9484.88	-0.143397	0.245645	0.251398	1	0
L204_100015-t1	5020.88	0.281662	0.0558601	0.667465	1	0
L204_100016-t1	8656.98	-1.35632	4.74942e-22	-0.971067	0	1
L204_100017-t1	5327.51	-0.0642577	0.760772	0.334248	1	0
L204_100018-t1	27780.5	-0.0494622	0.813979	0.329135	1	0
L204_100019-t1	1711.03	-0.902798	9.07041e-07	-0.469417	0	1
L204_100020-t1	43351.4	0.0708261	0.739718	0.450105	1	0
L204_100021-t1	813.571	0.694616	1.42657e-06	1.10356	1	0
L204_100022-t1	4693.52	0.375032	0.00571667	0.77857	1	0
L204_100023-t1	2580.04	-0.240078	0.161023	0.169592	1	0
L204_100024-t1	2959.7	-0.243067	0.13632	0.159655	1	0
L204_100025-t1	9772.03	0.635844	7.30999e-05	1.04209	1	0
L204_100026-t1	5629.51	-0.100055	0.546125	0.317686	1	0
L204_100027-t1	2571.35	0.00239939	0.987536	0.399959	1	0
L204_100028-t1	2036.52	1.00417	1.22121e-13	1.39758	1	0
L204_100029-t1	4232.2	0.60445	1.76658e-06	0.997285	1	0
L204_100030-t1	2120.94	0.169372	0.197406	0.571007	1	0
L204_100031-t1	1893.48	0.482262	0.0403628	0.879768	1	0
L204_100032-t1	4052.83	0.387306	0.00675767	0.781326	1	0
L204_100033-t1	89.704	-0.59612	0.0271839	-0.203339	0.033	0.967
L204_100034-t1	108.385	0.80273	0.00169519	1.1925	1	0
L204_100035-t1	4949.56	-0.275794	0.0920875	0.137989	1	0
L204_100036-t1	4007.96	0.819372	6.16214e-08	1.20487	1	0
L204_100037-t1	3485.45	0.0988265	0.463903	0.497648	1	0
L204_100038-t1	2473.01	-0.840069	1.29872e-09	-0.447071	0	1
L204_100039-t1	152.536	0.905025	8.46908e-05	1.29773	1	0
L204_100040-t1	4309.77	1.00304	1.25084e-08	1.42555	1	0
L204_100041-t1	1575.81	1.13647	2.01417e-13	1.52574	1	0
L204_100042-t1	3831.12	0.292078	0.0276836	0.694212	1	0
L204_100043-t1	1915.09	0.16262	0.319182	0.570793	1	0
L204_100044-t1	2080.38	-0.30758	0.0613938	0.115033	1	0
L204_100045-t1	8704.32	-0.460738	0.350635	-0.106456	0	1
L204_100046-t1	1327.44	-1.24107	1.00912e-16	-0.82335	0	1
L204_100047-t1	125954	-1.77759	1.72714e-16	-1.40898	0	1
L204_100048-t1	6968.38	-0.158847	0.283107	0.228591	1	0
L204_100049-t1	10407	0.398999	0.0188592	0.781838	1	0
L204_100050-t1	10580.6	0.532988	0.000128211	0.932628	1	0
L204_100051-t1	44951.2	-4.12153	7.62226e-191	-3.7268	0	1
L204_100052-t1	1582.73	-0.0692249	0.739718	0.301412	1	0
L204_100053-t1	5803.27	-1.96768	4.03275e-42	-1.58916	0	1
L204_100054-t1	6010.42	-0.0354446	0.823655	0.379222	1	0
L204_100055-t1	2314.41	-0.0374203	0.789286	0.363496	1	0
L204_100056-t1	1441.65	1.06045	9.13851e-14	1.45899	1	0
L204_100057-t1	2038.96	0.673711	7.48259e-06	1.0833	1	0
L204_100058-t1	301.565	1.53146	2.18094e-15	1.94397	1	0
L204_100059-t1	8701.94	0.713299	6.9229e-08	1.12188	1	0
L204_100060-t1	3688.29	-0.546774	0.00613309	-0.182069	0	1
L204_100061-t1	3555.08	2.78797	1.5265e-61	3.20563	1	0
L204_100062-t1	4213.63	-0.702928	6.35949e-08	-0.307149	0	1
L204_100063-t1	2109.95	-0.654905	4.73499e-05	-0.25573	0	1
L204_100064-t1	4598.02	-0.0357985	0.801627	0.362588	1	0
L204_100065-t1	1887.76	0.104834	0.504613	0.5166	1	0
L204_100066-t1	9685.55	-0.67843	4.64335e-05	-0.283471	0	1
L204_100067-t1	5712.4	-0.363683	0.00421168	0.0343566	0.994	0.006
L204_100068-t1	2565.73	0.0365255	0.813979	0.425255	1	0
L204_100069-t1	3210.12	0.139584	0.404521	0.525026	1	0
L204_100070-t1	1105.92	0.454139	0.00301798	0.868987	1	0
L204_100071-t1	1606.35	-0.480509	0.0254452	-0.0542233	0.031	0.969
L204_100072-t1	4232.76	2.93055	1.31979e-52	3.29504	1	0
L204_100074-t1	1815.29	-0.143004	0.453617	0.27733	1	0
L204_100075-t1	7498.99	-0.581575	9.45749e-06	-0.171604	0	1
L204_100076-t1	6510.84	0.406805	0.00202287	0.795002	1	0
L204_100077-t1	5183.64	0.521208	0.000178661	0.923773	1	0
L204_100078-t1	1084.42	-0.0877937	0.697511	0.289811	1	0
L204_100079-t1	2128.06	-0.5054	0.00118186	-0.113154	0	1
L204_100080-t1	978.471	0.474701	0.000457901	0.877752	1	0
L204_100081-t1	1813.08	-0.956565	3.25966e-10	-0.558444	0	1
L204_100082-t1	3077.7	-0.14481	0.335264	0.243742	1	0
L204_100083-t1	342.551	3.2513	2.81815e-43	3.64195	1	0
L204_100084-t1	93.6391	-0.566338	0.0884935	-0.175646	0.099	0.901
L204_100085-t1	6277.33	-0.815393	0.000126378	-0.45347	0	1
L204_100086-t1	5647.29	-0.95964	1.28839e-11	-0.544485	0	1
L204_100087-t1	3034.08	-0.153959	0.254184	0.249555	1	0
L204_100088-t1	2380.66	0.639258	0.00042081	1.06521	1	0
L204_100089-t1	2275	-0.870143	4.57755e-08	-0.454418	0	1
L204_100090-t1	2162.47	0.341993	0.0279756	0.753596	1	0
L204_100091-t1	11971.3	0.0526498	0.695794	0.460019	1	0
L204_100092-t1	1124.81	-0.145157	0.475152	0.25382	1	0
L204_100093-t1	3543.16	0.84047	7.27797e-09	1.24319	1	0
L204_100094-t1	673.394	0.147078	0.342925	0.549718	1	0
L204_100095-t1	2211.13	0.902178	3.68899e-05	1.26685	1	0
L204_100096-t1	2786.33	0.0534188	0.708364	0.451752	1	0
L204_100097-t1	1180.71	0.0754825	0.637278	0.477532	1	0
L204_100098-t1	7328.57	1.1753	2.70467e-22	1.56995	1	0
L204_100099-t1	2688.57	-1.38196	2.74812e-20	-0.990817	0	1
L204_100100-t1	839.986	0.67399	0.00165546	1.05507	1	0
L204_100101-t1	1448.79	0.335495	0.049691	0.742851	1	0
L204_100102-t1	3840.76	1.10284	2.94124e-17	1.50401	1	0
L204_100103-t1	2366.69	0.38131	0.00455166	0.786973	1	0
L204_100104-t1	1566.28	0.620805	0.00652829	1.04245	1	0
L204_100105-t1	4473.64	0.329114	0.0240508	0.711662	1	0
L204_100106-t1	4348.95	0.512559	4.31516e-05	0.905836	1	0
L204_100107-t1	3251.61	0.488836	0.000899587	0.87666	1	0
L204_100108-t1	3114.6	-1.00777	1.40461e-11	-0.623258	0	1
L204_100109-t1	3258.61	-0.479278	0.00865242	-0.0582888	0	1
L204_100110-t1	9037.33	-0.418752	0.00711742	-0.0286399	0.013	0.987
L204_100111-t1	2586.08	-0.445358	0.00392763	-0.0476919	0.013	0.987
L204_100112-t1	2549.24	-0.224149	0.144714	0.191626	1	0
L204_100113-t1	1517.38	0.0666652	0.729185	0.475697	1	0
L204_100114-t1	8135.09	0.345279	0.0484521	0.739857	1	0
L204_100115-t1	5735.22	-0.23263	0.209312	0.150079	1	0
L204_100116-t1	9483.55	-0.200289	0.175278	0.201295	1	0
L204_100117-t1	4255.35	-0.341149	0.0121358	0.0632406	1	0
L204_100118-t1	12751.6	-1.29612	4.05559e-14	-0.912213	0	1
L204_100119-t1	679.624	0.734495	6.78742e-05	1.12543	1	0
L204_100120-t1	1077.55	-1.91902	1.86081e-34	-1.52615	0	1
L204_100121-t1	3159.4	-1.40052	4.30756e-22	-1.01476	0	1
L204_100122-t1	2309.09	0.282747	0.0451209	0.680612	1	0
L204_100123-t1	11366.3	1.82224	1.44258e-26	2.21213	1	0
L204_100124-t1	1776.34	-0.605315	0.00187991	-0.215679	0	1
L204_100125-t1	2764.13	-0.596272	7.55712e-05	-0.185169	0	1
L204_100126-t1	2719.28	0.930928	1.72768e-12	1.33014	1	0
L204_100127-t1	1731.8	0.420399	0.00514209	0.823162	1	0
L204_100128-t1	631.913	0.411543	0.0120178	0.80841	1	0
L204_100129-t1	4906.8	-1.19253	3.79873e-13	-0.783867	0	1
L204_100130-t1	8423.72	2.3736	1.56878e-28	2.74077	1	0
L204_100131-t1	1038.77	-1.13081	2.22998e-14	-0.737514	0	1
L204_100132-t1	4426.39	-0.0600188	0.723332	0.359229	1	0
L204_100133-t1	871.53	1.09273	1.88035e-14	1.48594	1	0
L204_100134-t1	8064.23	-0.639495	8.86952e-07	-0.232145	0	1
L204_100135-t1	5001.66	0.175554	0.254184	0.562572	1	0
L204_100136-t1	73.9824	0.999267	0.00159022	1.40245	1	0
L204_100137-t1	518.775	-0.525059	0.00377252	-0.125836	0.006	0.994
L204_100138-t1	4516.2	0.341826	0.0226117	0.731227	1	0
L204_100139-t1	4244.22	-0.199067	0.120321	0.20553	1	0
L204_100140-t1	2317.36	0.938094	2.01088e-13	1.33763	1	0
L204_100141-t1	426.106	-0.243977	0.142342	0.151846	0.998	0.002
L204_100142-t1	2565.56	0.306587	0.0928451	0.726727	1	0
L204_100143-t1	2051.62	1.8558	1.09368e-27	2.25615	1	0
L204_100144-t1	16901.4	0.802786	1.01965e-09	1.20154	1	0
L204_100145-t1	1379.17	0.93578	8.32063e-09	1.32711	1	0
L204_100146-t1	2282.17	0.48771	0.00102865	0.901911	1	0
L204_100147-t1	8629.09	0.139851	0.452549	0.52711	1	0
L204_100148-t1	5465.76	0.14112	0.38041	0.521302	1	0
L204_100151-t1	6535.34	-0.26182	0.0561104	0.141904	1	0
L204_100152-t1	545.757	2.18684	2.85801e-29	2.61347	1	0
L204_100153-t1	945.634	1.38392	3.61562e-19	1.80081	1	0
L204_100154-t1	12809.9	2.21629	7.65136e-62	2.63336	1	0
L204_100156-t1	5063.88	0.468587	0.00212006	0.872411	1	0
L204_100158-t1	2761.51	-0.230806	0.229808	0.143524	1	0
L204_100159-t1	31454.5	-0.348655	0.066288	0.0302089	1	0
L204_100160-t1	79325.9	-2.57903	1.18513e-62	-2.17952	0	1
L204_100161-t1	2126.49	2.41928	8.14385e-38	2.84332	1	0
L204_100162-t1	21355	-0.222888	0.250324	0.155477	1	0
L204_100163-t1	11515	-1.30868	1.5334e-18	-0.889699	0	1
L204_100164-t1	1685.87	0.741632	3.02473e-06	1.13706	1	0
L204_100165-t1	9459.32	-1.09925	1.0142e-14	-0.709511	0	1
L204_100166-t1	6273.06	-0.0562115	0.728602	0.350135	1	0
L204_100167-t1	3628.37	-0.101612	0.489015	0.306122	1	0
L204_100168-t1	8083.99	0.784149	5.12713e-07	1.18606	1	0
L204_100169-t1	4540.99	1.85135	5.70386e-29	2.25822	1	0
L204_100170-t1	14231	-0.612672	2.21223e-05	-0.22205	0	1
L204_100171-t1	2084.41	-0.234532	0.0809388	0.16422	1	0
L204_100172-t1	5358.44	0.939958	8.37563e-14	1.35028	1	0
L204_100173-t1	11051.1	0.360778	0.0295958	0.749886	1	0
L204_100174-t1	767.843	-0.912655	1.77888e-10	-0.518666	0	1
L204_100175-t1	885.327	0.479755	0.000945717	0.868703	1	0
L204_100176-t1	27091.9	0.0764459	0.704664	0.463779	1	0
L204_100177-t1	9509.83	-1.11756	1.84181e-05	-0.707118	0	1
L204_100178-t1	2620.46	-0.260909	0.0510754	0.140896	1	0
L204_100179-t1	5143.47	0.931361	1.34316e-09	1.32655	1	0
L204_100180-t1	3452.89	-1.70018	4.10351e-34	-1.31	0	1
L204_100181-t1	57.7548	-2.02843	2.26037e-08	-1.60425	0	1
L204_100182-t1	6889.62	-1.34332	2.64001e-20	-0.924662	0	1
L204_100184-t1	5735.58	1.22819	8.49283e-22	1.6338	1	0
L204_100185-t1	2016.06	-0.317414	0.0145704	0.0841868	0.998	0.002
L204_100186-t1	3234.72	-0.213302	0.17764	0.175646	1	0
L204_100187-t1	1362.46	-1.31976	2.29666e-16	-0.911224	0	1
L204_100188-t1	31310.1	-0.630159	0.00105742	-0.258242	0	1
L204_100189-t1	20096.9	-1.21029	1.46873e-17	-0.829622	0	1
L204_100190-t1	2573.38	-1.28916	4.04614e-18	-0.898773	0	1
L204_100191-t1	4383.7	0.810021	8.40148e-08	1.2238	1	0
L204_100192-t1	2773.7	0.206194	0.189858	0.607617	1	0
L204_100193-t1	1910.73	0.714051	3.30606e-05	1.12464	1	0
L204_100194-t1	4391.97	-0.749044	8.82672e-09	-0.344988	0	1
L204_100195-t1	2651.31	-0.903193	4.09361e-11	-0.506815	0	1
L204_100196-t1	2302.68	1.73329	3.62873e-39	2.13263	1	0
L204_100197-t1	10474.6	-0.955482	2.23911e-07	-0.557719	0	1
L204_100198-t1	6970.23	0.103244	0.442911	0.504885	1	0
L204_100199-t1	2885.21	0.328381	0.0198036	0.712657	1	0
L204_100200-t1	3556.5	0.655009	8.06026e-08	1.0589	1	0
L204_100201-t1	2880.76	-2.07134	3.02925e-41	-1.68583	0	1
L204_100202-t1	3101.16	-0.340796	0.0136178	0.0560147	0.996	0.004
L204_100203-t1	3479.68	0.536477	4.09302e-05	0.943456	1	0
L204_100204-t1	5460	2.14221	3.29114e-35	2.52737	1	0
L204_100205-t1	5396.93	0.930919	1.14059e-07	1.34467	1	0
L204_100206-t1	4337.59	-0.619348	1.07416e-06	-0.222656	0	1
L204_100207-t1	638.984	2.15309	1.1365e-30	2.55631	1	0
L204_100208-t1	4081.04	0.417506	0.00068796	0.823839	1	0
L204_100209-t1	7203.94	0.679884	9.66136e-07	1.06895	1	0
L204_100210-t1	6994.09	0.844168	1.24228e-08	1.2556	1	0
L204_100211-t1	5628.13	-1.03609	5.90857e-19	-0.635457	0	1
L204_100212-t1	1642.99	0.180775	0.203342	0.574683	1	0
L204_100213-t1	2995.52	0.890059	8.23568e-10	1.27796	1	0
L204_100214-t1	2929.99	0.514534	0.000218478	0.918165	1	0
L204_100215-t1	2395.8	0.400591	0.0222238	0.781528	1	0
L204_100216-t1	2089.14	-1.43977	1.13271e-27	-1.04581	0	1
L204_100217-t1	23555.4	-0.728681	2.10441e-06	-0.335438	0	1
L204_100218-t1	10197.1	-0.144425	0.23	0.254255	1	0
L204_100219-t1	16815.9	-0.139065	0.420205	0.274828	1	0
L204_100220-t1	4281.37	-0.401474	0.0485273	0.0336661	0.965	0.035
L204_100221-t1	3783.55	-1.09189	1.19555e-11	-0.707984	0	1
L204_100222-t1	95.4726	-0.269916	0.297429	0.131998	0.861	0.139
L204_100223-t1	7499.65	-0.321206	0.010452	0.0750945	1	0
L204_100224-t1	4971.29	0.407955	0.000920241	0.806522	1	0
L204_100225-t1	9914.45	-0.731527	6.53974e-07	-0.327319	0	1
L204_100226-t1	1717.86	2.581	5.87119e-54	2.97822	1	0
L204_100227-t1	675.728	0.350779	0.0908339	0.729209	1	0
L204_100228-t1	2862.45	0.336563	0.0449112	0.734638	1	0
L204_100229-t1	9964.9	-0.951183	9.73439e-10	-0.554216	0	1
L204_100230-t1	2208.12	-1.09645	1.25201e-12	-0.686487	0	1
L204_100231-t1	2744.36	-0.34186	0.00570579	0.0541261	0.994	0.006
L204_100232-t1	3223.95	0.140341	0.361102	0.525177	1	0
L204_100233-t1	6570.27	-0.502327	0.000113724	-0.101556	0	1
L204_100234-t1	1974.92	4.37657	1.05773e-106	4.74067	1	0
L204_100235-t1	9044.81	-0.955532	4.86107e-05	-0.541594	0	1
L204_100236-t1	34694.9	-0.229509	0.20465	0.153676	1	0
L204_100237-t1	2360.45	-0.336337	0.0669101	0.067143	0.998	0.002
L204_100238-t1	2373.4	-0.844825	5.2384e-08	-0.45709	0	1
L204_100239-t1	4439.2	0.721617	4.32425e-08	1.11554	1	0
L204_100240-t1	5586.07	-0.0126454	0.930647	0.379244	1	0
L204_100241-t1	26628.8	0.18934	0.217759	0.574799	1	0
L204_100242-t1	230777	-1.62364	3.46636e-34	-1.22926	0	1
L204_100243-t1	4249.73	0.848922	3.63308e-07	1.24016	1	0
L204_100244-t1	13725.3	-0.00682708	0.963044	0.386248	1	0
L204_100245-t1	3787.93	-1.23266	2.34526e-23	-0.829046	0	1
L204_100246-t1	4891.98	0.330033	0.011903	0.733007	1	0
L204_100247-t1	1178.35	-0.179196	0.281819	0.239642	1	0
L204_100248-t1	5845.45	-0.703758	7.35378e-05	-0.27658	0	1
L204_100249-t1	1125.05	0.296996	0.0867622	0.715964	1	0
L204_100250-t1	2508.81	-0.928704	2.45154e-10	-0.513491	0	1
L204_100251-t1	5271.62	-1.613	9.21396e-20	-1.19648	0	1
L204_100252-t1	3267.78	0.328684	0.0279828	0.730375	1	0
L204_100253-t1	1352.85	0.575844	2.73012e-05	0.965145	1	0
L204_100254-t1	5370.24	-1.71036	5.24721e-28	-1.33305	0	1
L204_100255-t1	2990.46	-1.20864	1.82708e-18	-0.794412	0	1
L204_100256-t1	5408.9	0.35718	0.0118926	0.744333	1	0
L204_100257-t1	12410.2	-0.61915	2.56714e-06	-0.207068	0	1
L204_100258-t1	3750.72	-1.30592	1.06157e-14	-0.896768	0	1
L204_100259-t1	4372.48	-0.39074	0.00231753	0.0141124	0.787	0.213
L204_100260-t1	17416.9	-1.94269	2.08784e-33	-1.56316	0	1
L204_100261-t1	3536.86	-0.603397	0.0125307	-0.255561	0	1
L204_100262-t1	10296.7	-1.59321	6.01546e-30	-1.18713	0	1
L204_100263-t1	424.763	-2.24858	7.50902e-16	-1.82318	0	1
L204_100264-t1	2891.98	-2.04601	9.19967e-45	-1.65064	0	1
L204_100265-t1	7373.25	-1.01913	7.55243e-11	-0.620915	0	1
L204_100266-t1	9558.48	0.217793	0.240983	0.605817	1	0
L204_100267-t1	8897.87	-0.0347415	0.805857	0.367147	1	0
L204_100268-t1	6272.92	-1.17008	5.84832e-08	-0.810353	0	1
L204_100269-t1	2200.56	-0.853406	1.6354e-11	-0.449736	0	1
L204_100270-t1	11294	0.902541	8.53502e-13	1.30287	1	0
L204_100271-t1	3620.78	0.786635	6.45562e-08	1.18642	1	0
L204_100272-t1	2259.07	-1.43873	1.41827e-20	-1.04811	0	1
L204_100273-t1	31844.1	-3.87377	1.83239e-225	-3.46811	0	1
L204_100274-t1	8214.18	-0.92494	5.90782e-06	-0.557484	0	1
L204_100275-t1	4875.89	-1.12435	1.33714e-19	-0.734742	0	1
L204_100276-t1	11698.9	2.297	2.34449e-43	2.67037	1	0
L204_100277-t1	3483.51	-1.27687	6.10446e-23	-0.869342	0	1
L204_100278-t1	1576.81	-1.49466	5.06641e-26	-1.10275	0	1
L204_100279-t1	3936.38	0.0943392	0.60909	0.49377	1	0
L204_100280-t1	8516.37	-2.40792	2.26877e-65	-2.02297	0	1
L204_100281-t1	2591.12	-0.203175	0.185909	0.197991	1	0
L204_100282-t1	5421.54	1.0348	6.54809e-16	1.43465	1	0
L204_100283-t1	2431.9	0.735492	3.67938e-06	1.13225	1	0
L204_100284-t1	17278.5	-1.62274	4.82993e-34	-1.22746	0	1
L204_100285-t1	716.163	0.666918	4.03838e-05	1.05446	1	0
L204_100286-t1	720.253	0.569477	0.00142337	0.95477	1	0
L204_100288-t1	19769.9	-0.662985	0.000275049	-0.294124	0	1
L204_100289-t1	4540.66	-0.841891	9.36617e-09	-0.42722	0	1
L204_100290-t1	2013.17	0.0868674	0.591729	0.488227	1	0
L204_100291-t1	2022.3	0.345362	0.0179375	0.74236	1	0
L204_100292-t1	5466.7	-1.14761	2.92292e-10	-0.721749	0	1
L204_100293-t1	8465.93	0.253166	0.0708396	0.657329	1	0
L204_100294-t1	492.655	0.385058	0.0460159	0.771379	1	0
L204_100295-t1	21994.1	0.497463	0.000323537	0.897783	1	0
L204_100296-t1	3235.97	-1.39084	1.4171e-19	-1.0118	0	1
L204_100297-t1	13233.6	-1.66652	2.79981e-41	-1.27438	0	1
L204_100298-t1	17386.4	-0.782266	1.93702e-08	-0.386182	0	1
L204_100299-t1	1765.68	0.258653	0.0730514	0.654903	1	0
L204_100300-t1	3395.2	0.250291	0.051344	0.648263	1	0
L204_100301-t1	1230.43	0.196792	0.169001	0.588977	1	0
L204_100302-t1	7436.43	-0.784512	1.54571e-06	-0.3828	0	1
L204_100303-t1	7820.28	-0.645511	2.21089e-07	-0.240705	0	1
L204_100304-t1	1573.03	0.13313	0.461144	0.512217	1	0
L204_100307-t1	6735.71	-0.580106	0.000188546	-0.1666	0	1
L204_100308-t1	41379.5	-0.836042	3.49633e-05	-0.468802	0	1
L204_100309-t1	9954.59	1.18527	1.94231e-14	1.56946	1	0
L204_100310-t1	6852.68	-0.0670688	0.667928	0.338807	1	0
L204_100311-t1	4434.24	0.645094	1.44313e-06	1.05635	1	0
L204_100312-t1	117536	-0.355649	0.00491862	0.0371151	1	0
L204_100313-t1	7555.13	0.744653	2.40841e-05	1.1518	1	0
L204_100314-t1	3749.3	-0.0362523	0.789286	0.360387	1	0
L204_100315-t1	6512.8	-1.03918	8.73594e-12	-0.651812	0	1
L204_100316-t1	5453.74	-0.231969	0.119238	0.163151	1	0
L204_100317-t1	19070.3	-0.0645802	0.676105	0.332668	1	0
L204_100318-t1	187949	-0.490315	0.00476374	-0.0887115	0	1
L204_100319-t1	2985.44	-0.825329	4.60333e-08	-0.413464	0	1
L204_100320-t1	3827.17	-0.352915	0.00588476	0.0516366	0.995	0.005
L204_100321-t1	10086.4	-0.626619	2.02692e-06	-0.219314	0	1
L204_100322-t1	12852.7	0.269451	0.0474882	0.665229	1	0
L204_100323-t1	1136.59	0.309134	0.0792243	0.723873	1	0
L204_100324-t1	2692.33	0.0196474	0.885571	0.414006	1	0
L204_100325-t1	5262.71	-3.98454	2.90393e-118	-3.5891	0	1
L204_100326-t1	248.739	-1.34534	1.15716e-10	-0.974786	0	1
L204_100327-t1	61542.2	-0.876794	1.15733e-12	-0.479055	0	1
L204_100328-t1	3055.27	0.210746	0.250515	0.623146	1	0
L204_100329-t1	1465.23	-1.05333	4.44705e-15	-0.653931	0	1
L204_100330-t1	5360.81	0.763846	1.99421e-09	1.16441	1	0
L204_100331-t1	2716.43	0.239288	0.0727125	0.643792	1	0
L204_100332-t1	1096.96	-0.853092	2.18037e-05	-0.425438	0	1
L204_100333-t1	3666.71	0.688554	2.32247e-08	1.08182	1	0
L204_100334-t1	5620.53	-1.37467	8.68555e-26	-0.978027	0	1
L204_100335-t1	3572	-0.234123	0.11119	0.174688	1	0
L204_100336-t1	2500	0.845872	6.60845e-08	1.24329	1	0
L204_100337-t1	15062.1	-0.243402	0.0800904	0.154842	1	0
L204_100338-t1	3496.69	-1.23564	7.26604e-20	-0.826965	0	1
L204_100339-t1	136281	-0.387156	0.00253689	0.0055006	0.957	0.043
L204_100340-t1	3364.41	-0.301497	0.0203165	0.0933979	1	0
L204_100341-t1	12042.9	-2.07905	2.92489e-41	-1.67476	0	1
L204_100342-t1	2499.72	0.470835	0.00260926	0.860208	1	0
L204_100343-t1	2762.91	0.399967	0.0254362	0.777552	1	0
L204_100344-t1	1920.59	0.756515	7.91804e-08	1.15381	1	0
L204_100345-t1	61.8211	0.278281	0.399362	0.684756	1	0
L204_100346-t1	1387.24	0.0296485	0.912095	0.412153	1	0
L204_100347-t1	1328.14	-1.68182	1.2164e-24	-1.2822	0	1
L204_100348-t1	2142.23	0.387751	0.0546916	0.80516	1	0
L204_100349-t1	2911.75	-1.09044	1.04865e-09	-0.675455	0	1
L204_100350-t1	2862.53	0.923759	1.07283e-11	1.31294	1	0
L204_100351-t1	985.745	0.661725	8.99898e-05	1.03849	1	0
L204_100352-t1	6775.22	-0.646763	1.11325e-05	-0.259905	0	1
L204_100353-t1	2460.42	-0.157987	0.260083	0.233422	1	0
L204_100354-t1	1987.26	-0.00436942	0.979908	0.39026	1	0
L204_100355-t1	4225.7	1.1941	3.91831e-12	1.59632	1	0
L204_100356-t1	23541.2	0.477958	0.00930982	0.868758	1	0
L204_100357-t1	6229.6	-0.827524	1.89537e-11	-0.430317	0	1
L204_100358-t1	1182.9	0.246192	0.106993	0.636488	1	0
L204_100359-t1	5614.27	1.88937	7.27256e-05	2.31175	1	0
L204_100360-t1	4624.74	0.980085	1.0579e-12	1.37451	1	0
L204_100361-t1	5041.42	1.43882	3.04452e-27	1.83139	1	0
L204_100362-t1	1897.95	-1.43506	2.92933e-14	-1.06912	0	1
L204_100363-t1	4577.69	0.928059	2.27618e-08	1.34443	1	0
L204_100364-t1	2922.83	-0.876537	1.86731e-06	-0.488865	0	1
L204_100365-t1	831.501	1.25154	4.58893e-16	1.64039	1	0
L204_100366-t1	3493.86	0.815676	1.88125e-06	1.2365	1	0
L204_100367-t1	3031.87	1.79679	5.63706e-20	2.18277	1	0
L204_100368-t1	1562.36	0.908383	1.71817e-06	1.28806	1	0
L204_100369-t1	2398.51	0.011864	0.941789	0.417034	1	0
L204_100370-t1	1923.22	0.137663	0.366062	0.546433	1	0
L204_100371-t1	6575.45	0.478036	0.000205351	0.887689	1	0
L204_100372-t1	16425.4	-1.5109	1.5999e-11	-1.14774	0	1
L204_100373-t1	4646.14	-0.27896	0.107491	0.112727	1	0
L204_100374-t1	5618.43	-0.412435	0.0377126	0.0239224	0.939	0.061
L204_100375-t1	3519.9	-0.229106	0.200604	0.148869	1	0
L204_100376-t1	275.59	0.717919	0.00213188	1.11473	1	0
L204_100377-t1	3136.22	0.177667	0.231615	0.587749	1	0
L204_100378-t1	20599.3	-2.48902	8.05019e-72	-2.10707	0	1
L204_100379-t1	1692.65	-0.829251	4.28564e-05	-0.396159	0	1
L204_100380-t1	3269.74	-1.07527	7.44634e-12	-0.679514	0	1
L204_100381-t1	2140.59	0.516949	8.41904e-05	0.910809	1	0
L204_100382-t1	7331.81	2.46677	4.99806e-53	2.85204	1	0
L204_100383-t1	9752.6	0.263542	0.0767301	0.677901	1	0
L204_100384-t1	3038.03	-0.110072	0.481067	0.305749	1	0
L204_100385-t1	1877.03	0.337624	0.0152925	0.7341	1	0
L204_100386-t1	2188.9	-0.0388468	0.826507	0.342919	1	0
L204_100387-t1	72404.7	-0.0553594	0.745452	0.343885	1	0
L204_100388-t1	1893.63	-1.54928	1.28707e-26	-1.16487	0	1
L204_100389-t1	3090.01	0.195519	0.140101	0.593717	1	0
L204_100390-t1	1903.37	1.26515	4.23617e-08	1.64739	1	0
L204_100391-t1	3332.22	0.592127	0.00251416	0.96581	1	0
L204_100392-t1	4519.32	-0.801645	1.23277e-09	-0.399816	0	1
L204_100393-t1	1533	0.0501695	0.743529	0.445314	1	0
L204_100394-t1	44698.6	0.628986	2.32824e-06	1.01623	1	0
L204_100395-t1	4812.64	0.125414	0.381717	0.539392	1	0
L204_100396-t1	9398.56	-0.0272116	0.960569	0.348935	1	0
L204_100397-t1	983.033	-0.0949816	0.630826	0.282084	1	0
L204_100398-t1	6164.84	-1.64964	5.30642e-29	-1.24445	0	1
L204_100399-t1	4041.47	-0.281358	0.0354836	0.114634	1	0
L204_100400-t1	11852.8	-0.535178	0.000131472	-0.12002	0	1
L204_100401-t1	64.6006	-1.8471	5.58881e-09	-1.43599	0	1
L204_100402-t1	2916.04	-1.92347	1.9588e-37	-1.53918	0	1
L204_100403-t1	2007.48	-1.12699	5.38923e-15	-0.720506	0	1
L204_100404-t1	3360.09	-0.443971	0.00560628	-0.0591476	0.001	0.999
L204_100405-t1	5407.49	-1.02994	0.0371665	-0.678216	0	1
L204_100406-t1	30587.9	0.578128	0.00571014	0.952445	1	0
L204_100407-t1	1557.53	0.347132	0.0481875	0.741609	1	0
L204_100408-t1	6437.85	-2.17768	6.78169e-61	-1.77638	0	1
L204_100409-t1	2875.89	-0.163405	0.228506	0.237784	1	0
L204_100410-t1	1510.51	-0.338487	0.00900187	0.0586351	0.965	0.035
L204_100411-t1	5646.62	0.547575	3.07198e-05	0.952699	1	0
L204_100412-t1	1895.33	-0.738871	4.65649e-05	-0.31552	0	1
L204_100413-t1	757.761	3.28115	5.41171e-48	3.67722	1	0
L204_100414-t1	3490.78	-0.189327	0.224349	0.194491	1	0
L204_100415-t1	578.039	-0.508185	0.00188595	-0.0939252	0.031	0.969
L204_100416-t1	6834.98	0.71507	3.34832e-09	1.12041	1	0
L204_100417-t1	3802.13	-0.258228	0.103503	0.138461	1	0
L204_100418-t1	4053.99	0.80618	1.82514e-07	1.20677	1	0
L204_100419-t1	2819.23	0.652782	1.84673e-06	1.04669	1	0
L204_100420-t1	9573.54	1.84938	6.77457e-29	2.26055	1	0
L204_100421-t1	11707.8	-2.708	1.66754e-83	-2.30644	0	1
L204_100422-t1	608.196	-3.02028	2.22753e-40	-2.6004	0	1
L204_100423-t1	13646.7	0.844865	2.35795e-09	1.23671	1	0
L204_100424-t1	12399.2	-0.542464	0.0258225	-0.183633	0	1
L204_100425-t1	11687.6	-2.90034	2.81193e-59	-2.53456	0	1
L204_100426-t1	3546.29	-0.0670635	0.635134	0.337437	1	0
L204_100427-t1	3403.69	1.18256	6.46135e-16	1.57864	1	0
L204_100428-t1	865.961	0.150626	0.380915	0.550999	1	0
L204_100429-t1	2121.07	-0.129933	0.363524	0.262782	1	0
L204_100430-t1	657.462	-0.199441	0.293275	0.204879	1	0
L204_100431-t1	1555.62	0.141814	0.568361	0.583635	1	0
L204_100432-t1	3080.42	0.501707	0.000202747	0.888624	1	0
L204_100433-t1	2548.63	-0.078068	0.644218	0.33706	1	0
L204_100434-t1	1576.22	1.49692	3.86875e-21	1.88695	1	0
L204_100435-t1	6231.09	2.43774	1.75854e-44	2.82543	1	0
L204_100436-t1	2679.59	2.18865	1.02966e-55	2.5856	1	0
L204_100437-t1	28949.6	-0.804033	2.18221e-07	-0.378867	0	1
L204_100438-t1	1418.1	0.26476	0.135131	0.670496	1	0
L204_100439-t1	3729.54	0.932706	1.55457e-09	1.32441	1	0
L204_100440-t1	1931.13	0.201934	0.40498	0.647609	1	0
L204_100441-t1	8317.45	-1.70447	5.30642e-29	-1.2875	0	1
L204_100442-t1	35923.5	0.0744546	0.676236	0.46541	1	0
L204_100443-t1	56207.6	-0.548302	0.000511404	-0.158686	0	1
L204_100444-t1	5820.15	0.237999	0.0855894	0.629688	1	0
L204_100445-t1	6603.79	-0.0445103	0.784018	0.359251	1	0
L204_100446-t1	5112.21	0.255496	0.06262	0.647959	1	0
L204_100447-t1	5751.03	-0.789765	5.37812e-09	-0.381494	0	1
L204_100448-t1	186.616	0.600514	0.0130598	0.97843	1	0
L204_100449-t1	2134.4	2.22461	1.60386e-38	2.60671	1	0
L204_100450-t1	9171.29	-0.0884584	0.7051	0.273552	1	0
L204_100451-t1	4132.11	1.05274	7.04334e-11	1.44044	1	0
L204_100452-t1	2190.88	0.180913	0.393352	0.600936	1	0
L204_100453-t1	2640.67	-0.624925	0.000418413	-0.240033	0	1
L204_100454-t1	4521.53	0.892233	3.5781e-05	1.27116	1	0
L204_100455-t1	1430.01	0.136659	0.326801	0.53032	1	0
L204_100456-t1	1644.93	0.0967356	0.513306	0.50341	1	0
L204_100457-t1	1345.06	0.0794195	0.614278	0.480493	1	0
L204_100458-t1	3733.75	0.360308	0.00927798	0.750907	1	0
L204_100459-t1	3591.59	-0.460565	0.00546623	-0.0687809	0	1
L204_100460-t1	4636.01	-0.0431113	0.755677	0.364135	1	0
L204_100461-t1	3704.27	0.506982	0.00342548	0.928329	1	0
L204_100462-t1	2023.42	0.714093	3.03097e-08	1.11064	1	0
L204_100463-t1	10432.6	-2.13185	1.50085e-36	-1.76302	0	1
L204_100464-t1	2310.64	-0.814338	1.63582e-07	-0.412825	0	1
L204_100465-t1	3048.62	-2.74788	2.23197e-60	-2.37573	0	1
L204_100466-t1	5225.65	0.439993	0.0106486	0.846971	1	0
L204_100467-t1	942.275	3.30968	3.10918e-34	3.76951	1	0
L204_100468-t1	536.037	0.233484	0.320885	0.602314	1	0
L204_100469-t1	4320.49	-1.90903	1.63237e-44	-1.49946	0	1
L204_100470-t1	16413.2	-1.60892	3.96512e-12	-1.22484	0	1
L204_100471-t1	1688.5	-0.601067	0.000109519	-0.221828	0	1
L204_100472-t1	9013.75	0.286731	0.0239276	0.68603	1	0
L204_100473-t1	7197.36	1.07203	1.97022e-15	1.46657	1	0
L204_100474-t1	35070.1	0.601487	9.52946e-07	1.00802	1	0
L204_100475-t1	1538.17	-1.15785	4.94896e-18	-0.762825	0	1
L204_100476-t1	4614.74	0.631965	8.56268e-07	1.02995	1	0
L204_100477-t1	5562.87	-0.578166	0.000154348	-0.180071	0	1
L204_100478-t1	29645.8	0.0674467	0.714567	0.459893	1	0
L204_100479-t1	2370.06	-0.705454	2.83189e-06	-0.314894	0	1
L204_100480-t1	134.466	1.33478	5.93214e-07	1.71832	1	0
L204_100481-t1	1296.34	0.4787	0.00334758	0.879243	1	0
L204_100482-t1	370.954	-1.58326	2.97403e-18	-1.18963	0	1
L204_100483-t1	8626.94	-1.23401	2.89678e-20	-0.834056	0	1
L204_100484-t1	3144.97	-0.128157	0.374714	0.259471	1	0
L204_100485-t1	30829.5	-0.523126	0.00361413	-0.123957	0	1
L204_100486-t1	2971.09	0.293965	0.0236906	0.69724	1	0
L204_100487-t1	1692	0.40728	0.0447604	0.806341	1	0
L204_100488-t1	16215.6	0.538822	0.000608423	0.953474	1	0
L204_100489-t1	4667.45	0.393414	0.0303718	0.785651	1	0
L204_100490-t1	2554.9	-1.21076	1.11128e-15	-0.829054	0	1
L204_100491-t1	2115.5	0.559148	6.35991e-05	0.951864	1	0
L204_100492-t1	3269.59	0.0951317	0.465143	0.488844	1	0
L204_100493-t1	2924.33	0.853175	3.73752e-10	1.2565	1	0
L204_100494-t1	4624.84	-0.0932861	0.62158	0.299749	1	0
L204_100495-t1	2267.99	0.648401	2.94039e-05	1.0303	1	0
L204_100496-t1	4926.03	0.448611	0.00826686	0.862328	1	0
L204_100497-t1	1732.58	1.467	9.93407e-23	1.84662	1	0
L204_100498-t1	2358.91	-1.12786	1.53857e-07	-0.734612	0	1
L204_100499-t1	7836.77	0.699697	2.68195e-08	1.09955	1	0
L204_100500-t1	9611.24	-0.93128	1.43205e-12	-0.539273	0	1
L204_100501-t1	4793.39	0.0153439	0.913595	0.410493	1	0
L204_100502-t1	613.898	-0.16244	0.334081	0.239679	1	0
L204_100503-t1	4426.07	-0.302786	0.0344256	0.08258	1	0
L204_100504-t1	18158.5	-0.782668	5.44942e-05	-0.421188	0	1
L204_100505-t1	10823.6	0.161645	0.325757	0.570123	1	0
L204_100506-t1	3829.67	-2.15095	4.16678e-54	-1.76123	0	1
L204_100507-t1	4034.09	0.501485	9.84266e-05	0.908221	1	0
L204_100508-t1	1653.59	-0.475654	0.000988317	-0.08882	0	1
L204_100509-t1	2201.13	0.405283	0.0160363	0.792705	1	0
L204_100510-t1	3374.1	0.409551	0.00175938	0.798814	1	0
L204_100511-t1	569.275	0.480523	0.00100878	0.872797	1	0
L204_100512-t1	4953.21	0.309085	0.0931992	0.67772	1	0
L204_100513-t1	67062.8	-2.89521	2.68007e-48	-2.51411	0	1
L204_100514-t1	1195.38	-1.37649	8.85793e-16	-0.96448	0	1
L204_100515-t1	6447.02	-0.0224705	0.891217	0.385619	1	0
L204_100516-t1	2081.35	-0.281379	0.0598694	0.111886	1	0
L204_100517-t1	319.264	0.486376	0.00430168	0.886183	1	0
L204_100518-t1	6052.46	0.357473	0.00618657	0.757373	1	0
L204_100519-t1	48972.4	-3.05321	9.45508e-98	-2.65293	0	1
L204_100520-t1	4057.47	0.542423	5.79526e-05	0.938632	1	0
L204_100521-t1	1331.14	-0.895455	1.98395e-10	-0.483736	0	1
L204_100522-t1	2827.76	0.251668	0.0796893	0.656625	1	0
L204_100523-t1	2028.54	-0.19578	0.121994	0.206381	1	0
L204_100524-t1	2875.44	0.278956	0.154563	0.661768	1	0
L204_100525-t1	1932.26	0.510985	0.290076	0.926683	1	0
L204_100526-t1	36734	0.727691	0.135401	1.08419	1	0
L204_100527-t1	4221.75	-0.658639	2.07368e-06	-0.263575	0	1
L204_100528-t1	21662.5	0.285583	0.241293	0.653574	1	0
L204_100529-t1	5002.61	0.568473	4.12157e-05	0.971185	1	0
L204_100530-t1	2586.38	0.0261538	0.883636	0.428925	1	0
L204_100531-t1	1913.57	0.072388	0.619695	0.46335	1	0
L204_100532-t1	4780.95	0.756369	7.94546e-07	1.17674	1	0
L204_100533-t1	5819.79	0.274471	0.0448055	0.663591	1	0
L204_100534-t1	15192.2	1.04054	1.05155e-18	1.43314	1	0
L204_100535-t1	836.246	1.32576	7.12584e-18	1.73162	1	0
L204_100536-t1	274043	-2.35717	9.93637e-36	-1.95487	0	1
L204_100537-t1	2141.95	0.173356	0.181557	0.574847	1	0
L204_100539-t1	4530.54	0.217689	0.183446	0.632101	1	0
L204_100540-t1	7172.91	-0.645134	0.000435103	-0.21867	0	1
L204_100541-t1	317.572	-0.345577	0.149353	0.0138553	0.586	0.414
L204_100542-t1	1257.44	-0.730729	6.55714e-06	-0.323531	0	1
L204_100543-t1	6618.79	-0.588098	8.48986e-05	-0.187337	0	1
L204_100544-t1	10544.9	-1.00023	2.68323e-12	-0.608242	0	1
L204_100545-t1	4654.12	-0.60911	0.000383428	-0.180963	0	1
L204_100546-t1	2428.44	0.0604186	0.675978	0.450697	1	0
L204_100547-t1	1254.53	1.69282	8.02397e-24	2.07401	1	0
L204_100548-t1	7241.38	-1.02532	8.29796e-10	-0.596859	0	1
L204_100549-t1	11173.6	-0.5188	0.000159316	-0.109588	0	1
L204_100550-t1	30171.2	-3.19957	1.04952e-136	-2.80516	0	1
L204_100551-t1	13749.8	0.801575	9.77359e-12	1.19626	1	0
L204_100552-t1	1100.3	-0.327644	0.0172289	0.0675837	0.976	0.024
L204_100553-t1	138.788	-0.87667	0.000408977	-0.471905	0	1
L204_100554-t1	80053.1	-1.13726	2.60597e-16	-0.739062	0	1
L204_100555-t1	11491.4	-3.88654	3.07919e-111	-3.47582	0	1
L204_100556-t1	9478.53	-4.79545	1.79206e-108	-4.37143	0	1
L204_100557-t1	10398.3	0.520377	1.40544e-05	0.927411	1	0
L204_100558-t1	3100.97	0.199965	0.132757	0.60277	1	0
L204_100559-t1	283701	-2.24993	1.46801e-34	-1.84645	0	1
L204_100560-t1	6138.08	-0.323106	0.0340749	0.0816805	1	0
L204_100561-t1	3637.69	-1.52088	2.97265e-12	-1.11793	0	1
L204_100562-t1	94316.3	-3.19555	2.01529e-71	-2.78859	0	1
L204_100563-t1	5594.49	-0.112697	0.663175	0.243901	1	0
L204_100564-t1	6663.44	0.555631	1.55556e-05	0.949124	1	0
L204_100565-t1	1515.64	-1.02764	1.3299e-11	-0.609594	0	1
L204_100566-t1	7569.64	-1.40639	4.23386e-15	-1.03117	0	1
L204_100567-t1	359.968	-0.189401	0.445529	0.24184	1	0
L204_100568-t1	3285.96	-0.693567	9.33851e-06	-0.312723	0	1
L204_100569-t1	4950.48	0.807453	8.0663e-09	1.20383	1	0
L204_100570-t1	7869.24	-2.1046	1.10117e-42	-1.70234	0	1
L204_100571-t1	6848.41	-1.33009	3.62665e-23	-0.943104	0	1
L204_100572-t1	2261.81	-0.0905957	0.563633	0.326721	1	0
L204_100573-t1	52399	0.558628	2.10729e-05	0.946274	1	0
L204_100574-t1	7381.55	0.742101	3.94286e-08	1.13955	1	0
L204_100575-t1	94189.5	-1.8909	1.47223e-28	-1.46994	0	1
L204_100576-t1	2719.33	-0.764118	2.18377e-08	-0.352962	0	1
L204_100577-t1	4007.98	-0.659507	0.167406	-0.294394	0	1
L204_100578-t1	6202.51	-0.454606	0.00116067	-0.0516644	0	1
L204_100579-t1	3021.63	-0.413631	0.00265569	-0.00979145	0.307	0.693
L204_100580-t1	1640.83	0.667571	1.38888e-06	1.06686	1	0
L204_100581-t1	1227.33	2.9934	2.04208e-44	3.40512	1	0
L204_100582-t1	2594.08	0.58447	1.47144e-06	0.979169	1	0
L204_100583-t1	1239.95	0.421605	0.021685	0.838589	1	0
L204_100584-t1	769.734	0.27901	0.0893109	0.672163	1	0
L204_100585-t1	22338.2	0.714926	1.8345e-08	1.10695	1	0
L204_100586-t1	8578.64	-0.242121	0.118274	0.170874	1	0
L204_100587-t1	7283.98	-0.321542	0.0120804	0.0748205	1	0
L204_100588-t1	7642.87	-0.357862	0.0537095	0.0551401	1	0
L204_100589-t1	3281.36	1.74549	3.81599e-27	2.14873	1	0
L204_100590-t1	548.574	-0.996451	1.00084e-08	-0.595704	0	1
L204_100591-t1	10143.3	0.111754	0.409361	0.51004	1	0
L204_100592-t1	35329.3	1.0229	8.49294e-13	1.42597	1	0
L204_100593-t1	3234.95	0.340977	0.00954069	0.752415	1	0
L204_100594-t1	1742.69	0.269714	0.0591668	0.670559	1	0
L204_100595-t1	3670.69	0.227488	0.0811038	0.629688	1	0
L204_100596-t1	11162.3	0.198154	0.132483	0.592933	1	0
L204_100597-t1	8586.58	-2.64876	2.16387e-57	-2.27557	0	1
L204_100598-t1	3458.76	-1.55715	2.50689e-29	-1.17406	0	1
L204_100599-t1	1367.36	-1.5424	3.3377e-20	-1.14699	0	1
L204_100600-t1	62.5781	-2.12986	7.23604e-12	-1.72653	0	1
L204_100601-t1	1608.51	-1.19558	0.124969	-0.715735	0	1
L204_100602-t1	5076.78	-0.00107154	0.995337	0.423955	1	0
L204_100603-t1	2998.43	-0.651266	1.26155e-05	-0.235249	0	1
L204_100604-t1	342.766	0.79527	0.000158064	1.18766	1	0
L204_100605-t1	9791.41	-1.28631	4.78872e-24	-0.895403	0	1
L204_100606-t1	33337.2	0.270399	0.132994	0.678856	1	0
L204_100607-t1	2332.58	0.215404	0.0921186	0.616828	1	0
L204_100608-t1	31962.3	-0.581022	0.00315342	-0.203377	0	1
L204_100609-t1	7133.61	-0.167402	0.222038	0.222483	1	0
L204_100610-t1	219.456	0.132845	0.538961	0.545879	1	0
L204_100611-t1	4068.71	0.588678	1.52749e-06	0.989095	1	0
L204_100612-t1	2584	-2.11085	1.17529e-44	-1.71589	0	1
L204_100613-t1	4533.03	-0.111357	0.419291	0.298811	1	0
L204_100614-t1	240.172	0.346517	0.0867805	0.735193	1	0
L204_100615-t1	3351.05	1.20698	2.39698e-15	1.61254	1	0
L204_100616-t1	6281.19	-0.944276	2.33936e-07	-0.524174	0	1
L204_100617-t1	9170.72	-0.341864	0.0104207	0.0522629	1	0
L204_100618-t1	2090.13	0.365647	0.0107656	0.754597	1	0
L204_100619-t1	4347.8	0.904609	2.46601e-10	1.30613	1	0
L204_100620-t1	1079.26	1.18977	7.1988e-12	1.56786	1	0
L204_100621-t1	7182.46	-0.208115	0.137687	0.183264	1	0
L204_100622-t1	2853.32	-0.864213	3.59231e-07	-0.437345	0	1
L204_100623-t1	3145.6	0.255534	0.048196	0.650443	1	0
L204_100624-t1	8115.39	-1.20825	6.07578e-20	-0.817713	0	1
L204_100625-t1	4623.7	-1.89846	8.33065e-50	-1.49113	0	1
L204_100626-t1	3924.49	-0.166668	0.266459	0.22763	1	0
L204_100627-t1	4638.91	-0.776637	1.9716e-06	-0.356076	0	1
L204_100628-t1	1105.8	-0.758894	1.99717e-06	-0.348312	0	1
L204_100629-t1	2857.5	-0.851244	3.11429e-05	-0.43081	0	1
L204_100630-t1	1207.32	1.16406	2.50102e-19	1.56175	1	0
L204_100631-t1	1721.18	-0.808751	7.24652e-08	-0.40969	0	1
L204_100632-t1	1583.57	0.801557	1.25071e-07	1.18879	1	0
L204_100633-t1	7068.1	4.56571	1.76463e-89	4.96392	1	0
L204_100634-t1	228.334	-0.579253	0.00844498	-0.181281	0.013	0.987
L204_100635-t1	31128.5	-1.65507	1.53998e-34	-1.26934	0	1
L204_100636-t1	3089.54	-0.13957	0.336742	0.246542	1	0
L204_100637-t1	2853.65	-1.94741	1.64988e-32	-1.5704	0	1
L204_100638-t1	7493.42	0.580654	0.000580353	0.959644	1	0
L204_100639-t1	1391.24	0.555169	0.000274438	0.950812	1	0
L204_100640-t1	6327.13	0.00891592	0.947945	0.405644	1	0
L204_100641-t1	2726.29	0.817516	1.89538e-09	1.20722	1	0
L204_100642-t1	6659.07	-2.08492	7.80995e-63	-1.69035	0	1
L204_100643-t1	2774.01	1.26017	1.06353e-18	1.66013	1	0
L204_100644-t1	9066.7	-0.639469	0.00134955	-0.214311	0	1
L204_100645-t1	6204.39	-0.282687	0.0267004	0.108143	1	0
L204_100646-t1	4407.1	0.417724	0.00166965	0.820412	1	0
L204_100647-t1	3952.19	0.382604	0.0267047	0.765552	1	0
L204_100648-t1	10111.9	1.17118	2.66124e-13	1.55446	1	0
L204_100649-t1	1122.45	-0.234414	0.149352	0.168411	1	0
L204_100650-t1	4620.45	0.0345011	0.819909	0.443002	1	0
L204_100651-t1	2940.55	-1.42274	2.43736e-16	-1.04437	0	1
L204_100652-t1	5717.45	-0.328158	0.068409	0.0989315	1	0
L204_100653-t1	16.3107	0.640606	0.267534	1.06672	1	0
L204_100654-t1	591.063	-0.438843	0.0139073	-0.0293469	0.25	0.75
L204_100655-t1	7144.55	0.0617477	0.713836	0.441845	1	0
L204_100656-t1	1566.34	-0.566124	0.00016438	-0.172385	0	1
L204_100657-t1	978.701	0.724435	4.04258e-07	1.12963	1	0
L204_100658-t1	6133.69	-1.65871	2.19023e-27	-1.27849	0	1
L204_100659-t1	2052.49	1.52459	1.32725e-08	1.89129	1	0
L204_100661-t1	1562.49	1.04597	4.3115e-12	1.44475	1	0
L204_100662-t1	20086	1.08237	8.79561e-16	1.47271	1	0
L204_100663-t1	845.871	0.408766	0.00467341	0.811611	1	0
L204_100664-t1	102.309	1.50203	5.02025e-06	1.89211	1	0
L204_100665-t1	3299.52	0.112558	0.510039	0.536699	1	0
L204_100666-t1	5822.37	-1.72643	9.79716e-33	-1.33319	0	1
L204_100667-t1	30610.7	0.344984	0.0404615	0.722221	1	0
L204_100668-t1	443.415	0.498853	0.00467264	0.895473	1	0
L204_100669-t1	964.088	0.0648974	0.706723	0.455513	1	0
L204_100670-t1	3258.37	-0.177443	0.325472	0.227396	1	0
L204_100671-t1	166876	0.0378031	0.886988	0.398383	1	0
L204_100672-t1	3551.88	0.914743	7.77205e-12	1.31728	1	0
L204_100673-t1	7207.07	3.60455	4.29334e-56	3.99462	1	0
L204_100674-t1	4321.93	0.269494	0.0811222	0.660481	1	0
L204_100675-t1	3545.62	-0.529565	8.84802e-05	-0.132695	0	1
L204_100676-t1	5041.32	2.55317	3.33522e-57	2.95981	1	0
L204_100677-t1	2335.98	0.190086	0.182815	0.59098	1	0
L204_100678-t1	4375.99	-0.0687975	0.606479	0.338031	1	0
L204_100679-t1	1736.63	0.203579	0.172175	0.603692	1	0
L204_100680-t1	6730.8	0.495627	0.00196554	0.881054	1	0
L204_100681-t1	3444.7	-0.287753	0.0495832	0.0983387	1	0
L204_100682-t1	5549.81	-0.515611	0.000807633	-0.105584	0	1
L204_100683-t1	5516.87	1.30736	2.51792e-19	1.69326	1	0
L204_100684-t1	1684.77	0.676265	1.2672e-05	1.08101	1	0
L204_100685-t1	2367.97	-1.26083	1.86111e-22	-0.866908	0	1
L204_100686-t1	2676.29	0.654912	0.000254025	1.03273	1	0
L204_100687-t1	11687.6	0.703892	2.04406e-06	1.11521	1	0
L204_100688-t1	968.226	0.281842	0.0968451	0.66143	1	0
L204_100689-t1	5442.64	-0.991868	1.05557e-11	-0.587778	0	1
L204_100690-t1	1701.53	1.44713	4.0664e-30	1.84395	1	0
L204_100691-t1	4452	-1.52101	2.62129e-17	-1.12296	0	1
L204_100692-t1	6371.83	1.66352	4.48255e-25	2.0691	1	0
L204_100693-t1	3340.58	0.577661	1.65182e-05	0.969808	1	0
L204_100694-t1	6635.43	0.297724	0.265014	0.676042	1	0
L204_100695-t1	6891.42	-2.02792	1.30116e-35	-1.62228	0	1
L204_100696-t1	4447.89	0.208726	0.182601	0.624241	1	0
L204_100698-t1	2965.67	-0.118647	0.448846	0.29463	1	0
L204_100699-t1	2716.58	0.957389	3.80316e-12	1.35239	1	0
L204_100700-t1	7931.19	0.373987	0.0112011	0.762978	1	0
L204_100701-t1	5879.28	-0.886957	0.000120265	-0.515036	0	1
L204_100702-t1	2267.5	0.295863	0.0491392	0.695887	1	0
L204_100703-t1	40543.2	0.689184	2.75323e-05	1.06386	1	0
L204_100704-t1	2693.05	1.70861	6.18639e-38	2.10467	1	0
L204_100705-t1	7747.7	-0.737069	0.000205873	-0.368321	0	1
L204_100706-t1	1321.67	-0.209149	0.193636	0.170669	1	0
L204_100707-t1	1021.66	-0.964499	8.97065e-11	-0.55714	0	1
L204_100708-t1	502.994	0.126289	0.512024	0.520649	1	0
L204_100709-t1	1932.25	-0.0982935	0.614486	0.28308	1	0
L204_100710-t1	241.496	0.30294	0.142333	0.696724	1	0
L204_100711-t1	4698.91	-0.652645	5.46162e-05	-0.227384	0	1
L204_100712-t1	7627.82	-0.961539	7.04023e-12	-0.558091	0	1
L204_100713-t1	3674.48	-0.958389	5.67996e-12	-0.54889	0	1
L204_100714-t1	7001.9	0.952118	3.45091e-11	1.35227	1	0
L204_100715-t1	3733.52	-0.0467005	0.762057	0.347926	1	0
L204_100716-t1	24510	1.40118	2.20304e-26	1.79256	1	0
L204_100717-t1	6645.38	0.794065	1.64632e-07	1.18365	1	0
L204_100718-t1	2320.46	-0.388338	0.00198084	0.0113954	0.679	0.321
L204_100719-t1	3210.56	-0.388653	0.0230857	0.018563	0.778	0.222
L204_100720-t1	28247.1	1.20028	5.37206e-19	1.59602	1	0
L204_100721-t1	19414.5	-0.602299	3.68132e-05	-0.212283	0	1
L204_100722-t1	3067.77	-0.560565	9.29309e-06	-0.155931	0	1
L204_100723-t1	4297.97	-1.58804	9.27861e-22	-1.20341	0	1
L204_100724-t1	61367.6	-2.20238	1.0917e-45	-1.82227	0	1
L204_100725-t1	4692.82	-0.320299	0.0618504	0.0929245	1	0
L204_100726-t1	5983.1	-0.0199921	0.885583	0.371882	1	0
L204_100727-t1	1496.56	0.179913	0.269051	0.58375	1	0
L204_100728-t1	4160.93	1.04558	1.75665e-13	1.44931	1	0
L204_100729-t1	3084.33	-0.542866	0.00121194	-0.133366	0	1
L204_100730-t1	3609.04	0.297503	0.0433668	0.699232	1	0
L204_100732-t1	24735.8	-2.25651	1.72993e-57	-1.85908	0	1
L204_100733-t1	4494.31	-0.801551	8.60588e-08	-0.394854	0	1
L204_100734-t1	2472.35	-0.297096	0.119981	0.119117	1	0
L204_100735-t1	7019.08	-0.37185	0.00580889	0.0226874	0.954	0.046
L204_100736-t1	4383.85	0.802161	2.54098e-08	1.19607	1	0
L204_100737-t1	6061.92	1.12844	8.50623e-12	1.51885	1	0
L204_100738-t1	9270.06	0.646367	0.000246525	1.05549	1	0
L204_100739-t1	74972	0.150565	0.560417	0.532487	1	0
L204_100740-t1	1020.82	-0.208465	0.364758	0.172039	1	0
L204_100741-t1	420.729	0.335372	0.170423	0.699098	1	0
L204_100742-t1	6922.99	1.08837	9.58574e-17	1.47881	1	0
L204_100743-t1	5517.6	-1.55308	7.50434e-24	-1.17729	0	1
L204_100744-t1	31.8138	-1.30889	0.00406747	-0.880349	0	1
L204_100745-t1	2812.92	-0.878359	8.8013e-09	-0.469042	0	1
L204_100746-t1	4657.77	-0.289671	0.0222005	0.1049	1	0
L204_100747-t1	6040.53	0.0734082	0.619695	0.457731	1	0
L204_100748-t1	12279.7	-0.375614	0.00653363	0.0174801	0.95	0.05
L204_100749-t1	2839.03	0.233366	0.0847773	0.624297	1	0
L204_100750-t1	18845.7	-0.520386	0.000350279	-0.133458	0	1
L204_100751-t1	27055.4	0.0397659	0.813975	0.421501	1	0
L204_100752-t1	3062.17	1.29363	4.05046e-18	1.68239	1	0
L204_100753-t1	1033.23	0.61186	0.000135642	1.00786	1	0
L204_100754-t1	5329.08	-0.463846	0.00138174	-0.0628816	0	1
L204_100755-t1	3222.01	-1.96393	3.32883e-30	-1.55522	0	1
L204_100756-t1	3031.58	-2.1639	1.23598e-40	-1.78435	0	1
L204_100757-t1	5418.92	0.680737	2.29706e-06	1.08285	1	0
L204_100758-t1	8418.08	-4.11661	1.27923e-150	-3.69074	0	1
L204_100759-t1	5068.68	-0.497603	0.000162908	-0.0972197	0	1
L204_100760-t1	2250.16	1.25128	2.76822e-16	1.6466	1	0
L204_100761-t1	3006.08	0.116614	0.407113	0.516923	1	0
L204_100762-t1	3302.69	-0.425706	0.0119576	-0.00381809	0.4	0.6
L204_100763-t1	4734.13	-0.232469	0.119172	0.151911	1	0
L204_100764-t1	13072	0.147802	0.24336	0.544762	1	0
L204_100765-t1	1412.34	-1.80755	6.89868e-30	-1.42673	0	1
L204_100766-t1	2060.64	0.446519	0.000638691	0.846489	1	0
L204_100767-t1	2376.99	0.261967	0.162544	0.643801	1	0
L204_100768-t1	2591.38	0.14562	0.299799	0.546047	1	0
L204_100769-t1	1199.13	-0.182483	0.224889	0.23217	1	0
L204_100770-t1	71345.8	-0.120064	0.435645	0.278032	1	0
L204_100771-t1	28688.9	-0.333641	0.00455166	0.0645242	1	0
L204_100772-t1	8044.12	-2.88529	1.0466e-67	-2.4723	0	1
L204_100773-t1	9397.06	-1.54721	2.21482e-19	-1.13827	0	1
L204_100774-t1	11414.5	-0.567872	3.56704e-05	-0.165095	0	1
L204_100775-t1	3703.34	-0.687698	1.12524e-06	-0.283934	0	1
L204_100776-t1	4679.41	-0.460186	0.00332777	-0.0596598	0	1
L204_100777-t1	3624.11	0.444262	0.000815026	0.837225	1	0
L204_100778-t1	2999.08	-0.198909	0.209008	0.214995	1	0
L204_100779-t1	2136.84	0.788966	1.09591e-06	1.17679	1	0
L204_100780-t1	557.358	0.35242	0.0323333	0.738041	1	0
L204_100781-t1	3715.7	-0.311657	0.0559881	0.0862403	1	0
L204_100782-t1	3091.22	-0.516097	0.000123743	-0.12577	0	1
L204_100783-t1	1501.88	-1.31386	1.3308e-14	-0.910318	0	1
L204_100784-t1	4929.21	-0.975687	9.4163e-12	-0.576783	0	1
L204_100785-t1	3657.33	0.2492	0.0643026	0.649054	1	0
L204_100786-t1	1291.44	0.00313548	0.990193	0.372952	1	0
L204_100787-t1	3237.78	0.117581	0.39131	0.513026	1	0
L204_100788-t1	1914.93	0.11656	0.476951	0.498751	1	0
L204_100789-t1	2289.38	0.830407	2.34684e-09	1.23191	1	0
L204_100790-t1	2017.97	-0.901758	5.56448e-05	-0.506135	0	1
L204_100791-t1	46745.5	0.591015	0.564435	1.07038	1	0
L204_100792-t1	7147.71	-2.17053	6.17529e-38	-1.74419	0	1
L204_100793-t1	4452.06	3.67103	1.09397e-138	4.05426	1	0
L204_100794-t1	4797.37	0.437023	0.00438843	0.832396	1	0
L204_100795-t1	1881.49	0.413156	0.0110641	0.813738	1	0
L204_100796-t1	602.241	-0.250329	0.161314	0.134182	0.996	0.004
L204_100797-t1	3559.47	0.407548	0.00189482	0.808393	1	0
L204_100798-t1	2039.18	0.348818	0.0219936	0.738751	1	0
L204_100799-t1	4490.22	0.329299	0.0240057	0.744316	1	0
L204_100800-t1	3196.74	-0.166481	0.252058	0.24206	1	0
L204_100801-t1	3089.4	0.470738	0.00103311	0.865246	1	0
L204_100802-t1	3649.92	0.354983	0.00795059	0.751309	1	0
L204_100803-t1	8902.96	-0.209351	0.133017	0.18287	1	0
L204_100804-t1	6204.65	0.421658	0.00162103	0.810369	1	0
L204_100805-t1	34463.7	-2.15518	4.8573e-37	-1.74136	0	1
L204_100806-t1	1635.46	0.466691	0.00648315	0.861701	1	0
L204_100807-t1	6936.15	-0.904315	2.06533e-09	-0.483736	0	1
L204_100808-t1	2476.92	0.0775154	0.577513	0.466977	1	0
L204_100809-t1	4334.97	-0.392817	0.0032895	0.0120108	0.744	0.256
L204_100810-t1	1630.05	-1.40302	3.20848e-17	-1.02321	0	1
L204_100811-t1	1487.96	0.463926	0.00198336	0.858132	1	0
L204_100812-t1	2800.09	0.796665	3.10602e-08	1.19548	1	0
L204_100813-t1	4736.52	0.654921	5.17903e-05	1.03003	1	0
L204_100814-t1	3199.74	-0.0152597	0.921063	0.378645	1	0
L204_100815-t1	2348.98	1.47266	2.35886e-23	1.86299	1	0
L204_100816-t1	9570.56	-1.07818	1.02051e-16	-0.674036	0	1
L204_100817-t1	5096.04	2.60891	1.0242e-40	2.9923	1	0
L204_100818-t1	3969.56	-0.592663	1.9271e-05	-0.181624	0	1
L204_100819-t1	5546.57	-1.11255	2.82951e-10	-0.708223	0	1
L204_100820-t1	5204.89	1.44136	1.48764e-21	1.84479	1	0
L204_100821-t1	4483.08	0.328741	0.0515851	0.722038	1	0
L204_100822-t1	6574.99	-2.60993	6.65377e-43	-2.24939	0	1
L204_100823-t1	66620.6	-0.193813	0.143706	0.203151	1	0
L204_100825-t1	2913.14	0.123236	0.42052	0.535127	1	0
L204_100826-t1	4655.77	0.594566	4.01189e-06	0.996295	1	0
L204_100827-t1	2304.74	-0.451622	0.00454788	-0.0605455	0.007	0.993
L204_100828-t1	1996.65	-0.679117	2.69656e-07	-0.281787	0	1
L204_100829-t1	39700.5	-0.647456	0.195679	-0.285154	0	1
L204_100830-t1	9200.89	0.450707	0.00152659	0.868529	1	0
L204_100831-t1	3535.68	0.690515	1.3318e-06	1.07988	1	0
L204_100832-t1	5836.51	0.310635	0.0128552	0.703836	1	0
L204_100833-t1	5910.56	0.636625	1.76033e-07	1.03225	1	0
L204_100834-t1	7643.31	-0.284481	0.060055	0.0954924	1	0
L204_100835-t1	48221.4	-1.69148	9.17571e-16	-1.28049	0	1
L204_100836-t1	6304.45	-1.49098	9.06883e-27	-1.10643	0	1
L204_100837-t1	130.088	-0.539156	0.0997181	-0.137451	0.096	0.904
L204_100838-t1	2778.51	0.404238	0.0162093	0.790647	1	0
L204_100839-t1	8191.97	-0.187657	0.19388	0.22509	1	0
L204_100840-t1	3905.31	1.54742	8.65651e-17	1.91876	1	0
L204_100841-t1	2987.07	-1.27234	8.6274e-25	-0.867264	0	1
L204_100842-t1	4548.63	0.405556	0.000876154	0.805094	1	0
L204_100843-t1	2330.61	1.01717	9.2031e-13	1.40917	1	0
L204_100844-t1	21589.4	0.329272	0.0815276	0.702968	1	0
L204_100845-t1	4408.72	-1.60054	3.17672e-27	-1.18581	0	1
L204_100846-t1	3903.99	0.233767	0.185209	0.64501	1	0
L204_100847-t1	396.594	-0.0393314	0.85301	0.353233	1	0
L204_100848-t1	629.442	1.21181	9.25313e-09	1.60288	1	0
L204_100849-t1	2704.23	-0.835532	6.73452e-06	-0.448711	0	1
L204_100850-t1	3340.76	0.314233	0.0113774	0.710014	1	0
L204_100851-t1	51571.1	-2.85218	7.15318e-65	-2.47663	0	1
L204_100852-t1	11059.4	-1.85693	1.69322e-50	-1.4658	0	1
L204_100853-t1	6423.24	-2.71025	5.26525e-91	-2.29409	0	1
L204_100854-t1	5155.74	-1.44266	9.09586e-28	-1.02738	0	1
L204_100855-t1	4043.56	-2.01034	1.29255e-54	-1.62009	0	1
L204_100856-t1	1574.01	0.3663	0.00532375	0.771902	1	0
L204_100857-t1	7258.24	0.500717	3.63909e-05	0.898247	1	0
L204_100858-t1	7050.17	0.357536	0.00396353	0.753219	1	0
L204_100859-t1	3877.48	-0.841738	5.88665e-05	-0.404718	0	1
L204_100860-t1	3622.08	4.04095	1.14501e-133	4.46569	1	0
L204_100861-t1	1605.79	-1.62982	5.273e-14	-1.1923	0	1
L204_100862-t1	1194.35	0.933439	1.17765e-07	1.31525	1	0
L204_100863-t1	6901.51	0.647545	2.44417e-05	1.03916	1	0
L204_100864-t1	5122.25	-0.234602	0.198037	0.188084	1	0
L204_100865-t1	6300.87	0.364961	0.00588869	0.771674	1	0
L204_100866-t1	1725.34	-0.0550806	0.749579	0.35035	1	0
L204_100867-t1	3868.05	-0.311472	0.0204556	0.0869604	1	0
L204_100868-t1	1098.75	-0.635217	2.55854e-05	-0.249724	0	1
L204_100869-t1	864.741	0.80942	2.5538e-09	1.21055	1	0
L204_100870-t1	29980	-1.09321	4.47398e-15	-0.69348	0	1
L204_100871-t1	3758.31	-0.374381	0.00410807	0.0187054	0.833	0.167
L204_100872-t1	5257.88	0.335157	0.0149141	0.732096	1	0
L204_100873-t1	3825.52	-0.195413	0.181413	0.20389	1	0
L204_100874-t1	2372.06	-0.278471	0.0717263	0.101421	1	0
L204_100875-t1	13817	0.334828	0.0526635	0.708337	1	0
L204_100876-t1	3012.81	0.33202	0.0174193	0.730009	1	0
L204_100877-t1	4587.09	-0.296146	0.0215342	0.0956949	1	0
L204_100878-t1	2440.87	-0.152625	0.304191	0.251301	1	0
L204_100879-t1	4856.71	-0.824415	4.79664e-06	-0.395381	0	1
L204_100880-t1	4743.77	-0.199996	0.157656	0.199072	1	0
L204_100881-t1	2442.09	-0.454006	0.0120842	-0.0431345	0.036	0.964
L204_100882-t1	2953.58	-0.53421	0.000105879	-0.148804	0	1
L204_100883-t1	2932.66	-0.44958	0.00380483	-0.066289	0.002	0.998
L204_100884-t1	2473.48	1.45837	5.93424e-22	1.87085	1	0
L204_100885-t1	58940.3	0.77583	2.56372e-05	1.15469	1	0
L204_100886-t1	39394	1.07321	4.13165e-13	1.45926	1	0
L204_100887-t1	2859.13	0.639084	1.17964e-05	1.0498	1	0
L204_100888-t1	4850.49	-0.240827	0.192951	0.180543	1	0
L204_100889-t1	10382.8	-0.713307	5.20286e-05	-0.341417	0	1
L204_100890-t1	2412.18	-0.772362	1.07036e-07	-0.378523	0	1
L204_100891-t1	2804.13	-1.04333	2.51041e-13	-0.628522	0	1
L204_100892-t1	11445.9	-1.64106	8.06104e-24	-1.23405	0	1
L204_100893-t1	7296.42	0.0535972	0.696625	0.448404	1	0
L204_100894-t1	7221.73	0.691772	2.9925e-05	1.0842	1	0
L204_100895-t1	17578.6	-0.179341	0.154521	0.214771	1	0
L204_100896-t1	12853.6	-0.825127	4.0504e-12	-0.423202	0	1
L204_100897-t1	4293.91	-0.889021	1.24929e-11	-0.498373	0	1
L204_100898-t1	2300.73	-0.900734	8.10431e-08	-0.512025	0	1
L204_100899-t1	4312.4	-0.948447	9.71657e-07	-0.551304	0	1
L204_100900-t1	2817.87	-0.651863	0.000410417	-0.267967	0	1
L204_100901-t1	4793.22	0.643978	4.86883e-07	1.0429	1	0
L204_100902-t1	7192.53	-2.56735	6.6293e-60	-2.18015	0	1
L204_100903-t1	5440.33	-1.8861	2.63462e-38	-1.50842	0	1
L204_100904-t1	9095.82	0.165638	0.281669	0.571007	1	0
L204_100905-t1	3716.07	-1.2889	3.0679e-10	-0.872978	0	1
L204_100906-t1	1383.19	0.440149	0.00548946	0.826843	1	0
L204_100907-t1	3151.61	-0.526288	0.000107103	-0.115792	0	1
L204_100908-t1	1338.96	-0.743815	0.00258405	-0.30569	0	1
L204_100909-t1	2968.45	-1.36951	1.28819e-15	-0.943636	0	1
L204_100910-t1	5031.57	0.341746	0.0209114	0.733988	1	0
L204_100911-t1	6040.72	0.235168	0.0725648	0.625944	1	0
L204_100912-t1	40615.7	-0.630853	4.50049e-07	-0.232219	0	1
L204_100913-t1	7393.18	0.390394	0.501345	0.732582	1	0
L204_100914-t1	10833.7	0.438492	0.355274	0.800148	1	0
L204_100915-t1	2243.09	-0.279968	0.0982246	0.142008	1	0
L204_100916-t1	2667.84	0.427458	0.00299936	0.82011	1	0
L204_100917-t1	8793.35	0.588109	8.9654e-06	0.988667	1	0
L204_100918-t1	8686.99	1.99278	5.98184e-43	2.39948	1	0
L204_100919-t1	3011.87	-0.843599	0.000119388	-0.404402	0	1
L204_100920-t1	4039.83	-0.852073	2.65377e-06	-0.444943	0	1
L204_100921-t1	139.741	0.236975	0.369191	0.630517	1	0
L204_100922-t1	2188.51	-0.13784	0.332048	0.26206	1	0
L204_100923-t1	4207.63	0.544333	0.000130171	0.953072	1	0
L204_100924-t1	39641.6	2.68889	8.26837e-47	3.07147	1	0
L204_100925-t1	6180.38	0.751829	6.21561e-07	1.15593	1	0
L204_100926-t1	4348.3	-0.437498	0.00789216	-0.0194315	0.131	0.869
L204_100927-t1	1853.21	-0.484995	0.00114281	-0.0971253	0	1
L204_100928-t1	960.874	-0.242286	0.187737	0.176489	1	0
L204_100929-t1	1355.57	0.0583915	0.717941	0.440623	1	0
L204_100930-t1	3516.63	0.5748	5.9483e-06	0.976437	1	0
L204_100932-t1	9616.62	-0.0810308	0.567053	0.32209	1	0
L204_100933-t1	8555.87	0.312587	0.0225913	0.714821	1	0
L204_100934-t1	7433.18	0.829941	1.75548e-07	1.21359	1	0
L204_100935-t1	9145.24	-0.0674124	0.715828	0.358272	1	0
L204_100936-t1	115.086	0.0814521	0.799306	0.462157	1	0
L204_100937-t1	3521.76	-0.192168	0.208294	0.208904	1	0
L204_100938-t1	2363.94	-0.262514	0.174958	0.1338	1	0
L204_100939-t1	1896.42	-0.413233	0.00216621	-0.0179219	0.236	0.764
L204_100940-t1	1860.15	-0.813214	1.59623e-06	-0.426222	0	1
L204_100941-t1	749.075	0.258076	0.184496	0.65194	1	0
L204_100942-t1	2457.95	0.935546	3.03972e-11	1.32504	1	0
L204_100943-t1	2719.62	-0.604265	2.18786e-05	-0.201421	0	1
L204_100944-t1	4866.74	-0.218816	0.0706413	0.180784	1	0
L204_100945-t1	9903.08	-0.895525	3.81989e-10	-0.499006	0	1
L204_100946-t1	2829.93	-0.228031	0.142548	0.172603	1	0
L204_100947-t1	4464.61	-1.16595	9.30523e-17	-0.779756	0	1
L204_100948-t1	2836.11	-0.497689	0.000404929	-0.112046	0	1
L204_100950-t1	3974.91	0.0688685	0.646761	0.4852	1	0
L204_100951-t1	4030	0.498469	9.57379e-05	0.905921	1	0
L204_100952-t1	6654.23	0.539418	6.16945e-05	0.923355	1	0
L204_100953-t1	2556.62	0.758594	3.51268e-09	1.15909	1	0
L204_100954-t1	278.777	1.12304	3.29118e-08	1.53155	1	0
L204_100955-t1	5994.38	0.243936	0.235756	0.619282	1	0
L204_100956-t1	2634.5	-0.76237	2.8437e-06	-0.382247	0	1
L204_100957-t1	5086.32	-0.402962	0.00422025	-0.0121396	0.26	0.74
L204_100958-t1	3901.08	-2.67815	2.18715e-89	-2.28736	0	1
L204_100959-t1	5568.37	0.294681	0.153723	0.728774	1	0
L204_100960-t1	2056.48	-0.368158	0.00894863	0.0218919	0.8	0.2
L204_100961-t1	2245.6	-1.58745	1.02337e-22	-1.19193	0	1
L204_100962-t1	21908.7	0.768622	1.95128e-07	1.16584	1	0
L204_100963-t1	206.617	0.184102	0.545829	0.614795	1	0
L204_100964-t1	308.681	0.296692	0.189885	0.718009	1	0
L204_100965-t1	748.068	0.273044	0.0740571	0.669462	1	0
L204_100966-t1	10086.2	-0.35738	0.0130598	0.0515948	1	0
L204_100967-t1	811.217	0.410836	0.0212038	0.814222	1	0
L204_100968-t1	6083.69	0.195205	0.123343	0.599594	1	0
L204_100969-t1	5504.18	-0.155998	0.304708	0.227951	1	0
L204_100970-t1	1627.86	0.0705777	0.683744	0.469928	1	0
L204_100971-t1	5716.83	-0.276709	0.0525712	0.131247	1	0
L204_100972-t1	10609.5	-0.662872	0.000477644	-0.234023	0	1
L204_100973-t1	477.036	1.9553	3.69153e-19	2.37174	1	0
L204_100974-t1	4346.31	0.158609	0.218377	0.557513	1	0
L204_100975-t1	950.79	0.25006	0.089924	0.640269	1	0
L204_100976-t1	908.252	0.173671	0.29788	0.570803	1	0
L204_100977-t1	93.4081	-1.96368	1.0856e-13	-1.56175	0	1
L204_100978-t1	65.7002	-1.66693	8.92983e-09	-1.26533	0	1
L204_100979-t1	763.903	0.120343	0.499084	0.521664	1	0
L204_100980-t1	388.459	-0.14269	0.469489	0.276949	1	0
L204_100981-t1	3407.49	0.832013	1.59396e-06	1.23286	1	0
L204_100982-t1	2238.15	-0.67936	6.15715e-07	-0.284715	0	1
L204_100983-t1	7042.01	0.450877	0.00256692	0.849335	1	0
L204_100984-t1	4898.49	-0.178413	0.292865	0.220367	1	0
L204_100985-t1	3987.11	0.184667	0.256398	0.599223	1	0
L204_100986-t1	705.383	-0.585825	0.000287481	-0.188211	0	1
L204_100987-t1	9560.32	-1.86727	6.22038e-35	-1.463	0	1
L204_100988-t1	5412.41	0.329018	0.0614502	0.717947	1	0
L204_100989-t1	11120.1	-1.63519	1.35729e-24	-1.26013	0	1
L204_100990-t1	2817.39	-0.166311	0.223843	0.230621	1	0
L204_100991-t1	3550.46	-0.465567	0.00091209	-0.0529166	0.005	0.995
L204_100992-t1	5411.94	-1.41597	1.43849e-26	-1.0233	0	1
L204_100993-t1	8283.1	0.721944	7.9441e-07	1.12512	1	0
L204_100994-t1	27605.7	-0.272713	0.033763	0.124368	1	0
L204_100995-t1	2208.55	-0.437727	0.0180865	-0.0409906	0.047	0.953
L204_100996-t1	11076.5	-0.378675	0.00328687	0.0107369	0.82	0.18
L204_100997-t1	2972.95	-1.51761	3.51109e-21	-1.13986	0	1
L204_100998-t1	1389.27	-0.60478	0.000529911	-0.223225	0	1
L204_100999-t1	845.401	1.44941	8.37517e-19	1.85242	1	0
L204_101000-t1	3860.71	-0.10828	0.601209	0.321397	1	0
L204_101001-t1	5186.79	-0.248024	0.0461451	0.156008	1	0
L204_101002-t1	1673.41	-0.279806	0.07145	0.10169	0.999	0.001
L204_101003-t1	1274.8	0.353889	0.0124277	0.745857	1	0
L204_101004-t1	2414.1	-1.20784	1.96214e-21	-0.810056	0	1
L204_101005-t1	2986.87	-0.755122	1.74174e-09	-0.351018	0	1
L204_101006-t1	2775.41	0.914502	1.65501e-07	1.29958	1	0
L204_101007-t1	3045.15	-0.704297	2.36258e-08	-0.306321	0	1
L204_101008-t1	4951.61	-1.56788	4.52368e-36	-1.16998	0	1
L204_101009-t1	2708.78	0.744358	4.81892e-07	1.1384	1	0
L204_101010-t1	3868.69	1.11873	9.60398e-22	1.51447	1	0
L204_101011-t1	59136.9	-1.09702	3.16117e-05	-0.754622	0	1
L204_101012-t1	9575.42	0.852307	2.57858e-07	1.23251	1	0
L204_101013-t1	6901.14	-0.00186835	0.990392	0.398646	1	0
L204_101014-t1	6468.74	-0.389571	0.00694678	0.00996339	0.768	0.232
L204_101015-t1	1477.84	0.120876	0.442575	0.52303	1	0
L204_101016-t1	19376.5	-1.35423	3.91052e-28	-0.965071	0	1
L204_101017-t1	7650.64	-0.207803	0.156992	0.196255	1	0
L204_101018-t1	6457.4	-1.27801	2.07918e-09	-0.838395	0	1
L204_101019-t1	8315	0.50805	1.00516e-05	0.908605	1	0
L204_101020-t1	4559.68	1.08477	5.09026e-16	1.49215	1	0
L204_101021-t1	2361.57	0.956483	8.23173e-10	1.34995	1	0
L204_101022-t1	1084.27	0.572723	0.00134143	0.960512	1	0
L204_101023-t1	2682.33	-0.921911	8.75597e-09	-0.543674	0	1
L204_101024-t1	6544.58	-0.533964	0.000121912	-0.126907	0	1
L204_101025-t1	3121.84	-1.4427	2.46841e-17	-1.06692	0	1
L204_101026-t1	3941.38	0.789321	3.23149e-09	1.19438	1	0
L204_101027-t1	7664.23	1.1141	1.33966e-20	1.51269	1	0
L204_101028-t1	5847.78	-1.15205	2.09715e-15	-0.766527	0	1
L204_101029-t1	2817.5	-0.684716	1.0269e-05	-0.301225	0	1
L204_101030-t1	4667.35	0.427332	0.00408025	0.823978	1	0
L204_101031-t1	13053.7	0.0598239	0.675978	0.462272	1	0
L204_101032-t1	3821.71	0.520224	2.44117e-05	0.927146	1	0
L204_101033-t1	3281.42	0.478778	0.000430518	0.874805	1	0
L204_101034-t1	841.91	0.0358837	0.841946	0.435757	1	0
L204_101035-t1	2282.57	0.589756	0.00105182	1.01695	1	0
L204_101036-t1	1705.5	0.51793	0.00143823	0.923834	1	0
L204_101037-t1	2063.7	-1.39885	2.32591e-10	-0.961623	0	1
L204_101038-t1	1489.37	0.892537	4.99205e-09	1.28178	1	0
L204_101039-t1	698.848	-0.179068	0.367635	0.226324	1	0
L204_101040-t1	4658.19	-1.48985	9.98527e-19	-1.10415	0	1
L204_101041-t1	16402.7	-0.711542	4.69179e-07	-0.302114	0	1
L204_101042-t1	2127	-3.22542	2.42866e-97	-2.81063	0	1
L204_101043-t1	11766	-0.590481	0.000477344	-0.166086	0	1
L204_101044-t1	2375.96	-1.21707	5.20787e-15	-0.839008	0	1
L204_101046-t1	3292.48	-1.06267	6.36237e-14	-0.671882	0	1
L204_101047-t1	13553.2	0.832995	1.09919e-08	1.23356	1	0
L204_101048-t1	13832.1	-0.730282	1.32725e-08	-0.320069	0	1
L204_101049-t1	7183.16	-0.235619	0.0649147	0.164233	1	0
L204_101050-t1	4795.61	1.02685	2.11896e-15	1.41894	1	0
L204_101051-t1	2689.58	-0.271744	0.0581852	0.136178	1	0
L204_101052-t1	9761.28	1.87932	4.71301e-23	2.27593	1	0
L204_101053-t1	1086.71	0.540313	0.000816438	0.926531	1	0
L204_101054-t1	1510.98	-0.11488	0.451059	0.281502	1	0
L204_101055-t1	106.903	-0.51052	0.0520461	-0.116564	0.148	0.852
L204_101056-t1	1618.1	1.08339	6.46234e-12	1.48042	1	0
L204_101057-t1	2837.71	-0.341209	0.0404248	0.0354832	0.934	0.066
L204_101058-t1	117398	-2.26412	5.0119e-46	-1.86769	0	1
L204_101059-t1	4835.3	0.310644	0.0968735	0.694586	1	0
L204_101060-t1	6812.94	0.730432	8.53536e-10	1.12383	1	0
L204_101061-t1	2767.63	0.018248	0.899889	0.408418	1	0
L204_101062-t1	6737.14	0.748546	2.109e-08	1.13714	1	0
L204_101063-t1	5832.65	-1.11716	2.09908e-15	-0.732617	0	1
L204_101064-t1	3203.11	-0.757372	2.98991e-06	-0.378911	0	1
L204_101065-t1	4055.25	-0.969389	1.90015e-15	-0.574179	0	1
L204_101066-t1	31233.7	-2.30134	4.07906e-24	-1.84968	0	1
L204_101067-t1	8451.78	-0.147556	0.232885	0.255742	1	0
L204_101068-t1	2093.82	-1.43153	2.45932e-26	-1.04085	0	1
L204_101069-t1	389.697	1.1379	0.032847	1.45856	1	0
L204_101070-t1	875.14	0.283217	0.235014	0.716771	1	0
L204_101071-t1	6055.85	-0.492631	0.00024816	-0.0873814	0	1
L204_101072-t1	15193.4	0.675288	3.36103e-07	1.07748	1	0
L204_101073-t1	5326.48	0.208529	0.153603	0.593153	1	0
L204_101074-t1	2434.55	0.59416	0.000104794	0.982882	1	0
L204_101075-t1	12321.8	-0.0496351	0.714438	0.346259	1	0
L204_101076-t1	4792.85	-0.540652	0.000443384	-0.155969	0	1
L204_101077-t1	2868.01	-1.96071	2.77856e-17	-1.61455	0	1
L204_101078-t1	6518.64	-0.192148	0.146257	0.208442	1	0
L204_101079-t1	2932.36	-0.370071	0.00489983	0.0356802	0.948	0.052
L204_101080-t1	3413.5	-0.689903	1.65441e-05	-0.275508	0	1
L204_101081-t1	4970.69	-0.354522	0.00498909	0.045401	0.996	0.004
L204_101083-t1	2229.06	0.197272	0.167131	0.602542	1	0
L204_101084-t1	10656	0.255427	0.13818	0.669979	1	0
L204_101085-t1	5283.25	-0.314533	0.0588034	0.0742725	1	0
L204_101086-t1	2835.53	-1.41184	2.74308e-24	-1.00633	0	1
L204_101087-t1	2117.66	-0.179196	0.257456	0.204854	1	0
L204_101088-t1	2354.95	-0.342522	0.011962	0.0522629	0.979	0.021
L204_101089-t1	5257	0.433084	0.00350002	0.835358	1	0
L204_101090-t1	6784.18	-1.00523	8.58699e-09	-0.631123	0	1
L204_101091-t1	1850.27	0.0106435	0.941437	0.40378	1	0
L204_101094-t1	2656.61	0.274784	0.0543816	0.679946	1	0
L204_101096-t1	1731.36	0.510359	0.000655416	0.912129	1	0
L204_101097-t1	15344.3	4.42006	5.10846e-138	4.81497	1	0
L204_101098-t1	1522.24	-0.00540864	0.973944	0.382612	1	0
L204_101099-t1	4404.05	0.371072	0.0441834	0.753921	1	0
L204_101100-t1	2205.58	1.1115	3.58202e-05	1.52957	1	0
L204_101101-t1	3773.71	0.125292	0.556719	0.529841	1	0
L204_101102-t1	4926.94	0.083197	0.568216	0.475075	1	0
L204_101103-t1	10226.3	-0.275089	0.078732	0.137412	1	0
L204_101104-t1	1863.89	-0.0838011	0.581211	0.312166	1	0
L204_101105-t1	23620.4	-0.106756	0.563633	0.301974	1	0
L204_101106-t1	1648.56	1.20211	1.49386e-13	1.58503	1	0
L204_101107-t1	20137.9	-1.1341	6.36288e-06	-0.761438	0	1
L204_101108-t1	2984.7	0.363462	0.0112752	0.754015	1	0
L204_101109-t1	1162.75	0.198344	0.172919	0.594969	1	0
L204_101110-t1	1858.84	1.09201	1.19593e-14	1.48634	1	0
L204_101111-t1	1410.31	0.918668	6.58925e-11	1.30816	1	0
L204_101112-t1	2213.21	0.312161	0.0177405	0.711363	1	0
L204_101113-t1	2675.08	0.316818	0.00987746	0.715577	1	0
L204_101114-t1	5849.34	-0.180535	0.213081	0.232599	1	0
L204_101115-t1	46122.3	0.271656	0.138699	0.647664	1	0
L204_101116-t1	2990.81	1.21223	5.72122e-15	1.6017	1	0
L204_101117-t1	12717.9	0.393091	0.0110891	0.799444	1	0
L204_101118-t1	12707.4	0.542159	3.98935e-06	0.937713	1	0
L204_101119-t1	11750.7	-0.474581	0.000569188	-0.0679003	0	1
L204_101121-t1	6558.13	-0.0185543	0.889085	0.385873	1	0
L204_101122-t1	6846.34	0.303209	0.0133295	0.69748	1	0
L204_101123-t1	5866.16	0.497817	8.46835e-05	0.899964	1	0
L204_101124-t1	1289.26	1.1909	2.8676e-15	1.57519	1	0
L204_101125-t1	4119.17	-0.274243	0.0600691	0.11442	1	0
L204_101126-t1	8025.09	0.927691	3.87759e-12	1.3262	1	0
L204_101127-t1	4343.34	-0.710244	5.64429e-05	-0.287732	0	1
L204_101128-t1	8628.89	2.9644	2.25887e-62	3.34852	1	0
L204_101129-t1	424.063	1.53525	1.49894e-17	1.91877	1	0
L204_101130-t1	3030.17	-1.16625	2.99957e-18	-0.777224	0	1
L204_101131-t1	2295.3	-0.35418	0.00462037	0.0441843	0.97	0.03
L204_101132-t1	1459.01	0.161288	0.262181	0.568976	1	0
L204_101133-t1	2819.38	0.356095	0.0184652	0.740599	1	0
L204_101134-t1	3149.74	-0.66587	2.35559e-05	-0.263972	0	1
L204_101135-t1	1723.35	0.383887	0.0199652	0.797702	1	0
L204_101136-t1	2366.46	0.609799	2.25531e-06	1.00162	1	0
L204_101137-t1	30421.6	0.120294	0.637278	0.493032	1	0
L204_101138-t1	786.865	0.116504	0.445529	0.517044	1	0
L204_101139-t1	3801.49	0.914452	1.27425e-14	1.31435	1	0
L204_101140-t1	60156.5	0.0169014	0.924458	0.409179	1	0
L204_101141-t1	4005.82	-1.31391	8.5346e-17	-0.901772	0	1
L204_101142-t1	3936.04	0.0627126	0.667189	0.456838	1	0
L204_101143-t1	4701.17	-0.849024	2.3509e-09	-0.448436	0	1
L204_101144-t1	54897.4	-1.13225	3.7118e-13	-0.75499	0	1
L204_101145-t1	6661.82	0.726989	1.72901e-10	1.12799	1	0
L204_101146-t1	5838.05	-0.108154	0.412678	0.283175	1	0
L204_101147-t1	1306.38	-0.549815	2.88066e-05	-0.146916	0	1
L204_101148-t1	10349.8	-1.00876	1.49536e-18	-0.60667	0	1
L204_101149-t1	1535.97	-0.177032	0.243326	0.224188	1	0
L204_101150-t1	3910.34	-0.311619	0.0236707	0.0963698	1	0
L204_101151-t1	8565.05	-2.71639	5.75001e-74	-2.31164	0	1
L204_101152-t1	11519.5	0.327756	0.0106585	0.731357	1	0
L204_101153-t1	3287.42	0.243178	0.24256	0.678117	1	0
L204_101154-t1	6223.5	0.509793	1.6981e-05	0.911362	1	0
L204_101155-t1	2159.96	0.742725	2.23182e-07	1.12941	1	0
L204_101156-t1	959.157	1.58169	4.15887e-14	1.94578	1	0
L204_101157-t1	6528.26	0.829222	6.58925e-11	1.23318	1	0
L204_101158-t1	3906.95	0.193288	0.195957	0.604403	1	0
L204_101159-t1	2707.96	-0.136613	0.410312	0.272071	1	0
L204_101160-t1	32303.4	-2.5238	6.89795e-28	-2.15482	0	1
L204_101161-t1	2007.85	-0.0357688	0.852965	0.36096	1	0
L204_101162-t1	75.8303	-0.75901	0.0111714	-0.384967	0.003	0.997
L204_101163-t1	1292.14	0.327478	0.0324348	0.713476	1	0
L204_101164-t1	1017.89	0.720718	0.0130864	1.16829	1	0
L204_101165-t1	5893	0.736848	8.65607e-08	1.13196	1	0
L204_101166-t1	30402.4	0.525266	9.13583e-06	0.923758	1	0
L204_101167-t1	13464	0.363107	0.0431843	0.787014	1	0
L204_101168-t1	4118.2	-0.938341	2.78988e-11	-0.523743	0	1
L204_101169-t1	3778.39	0.322007	0.0203491	0.708761	1	0
L204_101170-t1	3985.6	0.503499	0.00260509	0.905936	1	0
L204_101171-t1	16343	0.319779	0.0506011	0.698939	1	0
L204_101172-t1	3081.66	0.535234	8.59624e-06	0.939708	1	0
L204_101173-t1	1925.57	0.20561	0.379621	0.641491	1	0
L204_101174-t1	2143.89	-0.00021013	0.99873	0.389534	1	0
L204_101175-t1	2383.33	0.436166	0.00663539	0.846754	1	0
L204_101176-t1	4286.06	0.00432171	0.979908	0.406765	1	0
L204_101177-t1	4316.08	0.851526	3.48313e-08	1.26178	1	0
L204_101178-t1	4028.61	0.985955	3.04034e-12	1.38738	1	0
L204_101179-t1	5042.42	0.80723	7.64509e-06	1.22351	1	0
L204_101180-t1	3096.85	-0.431682	0.0031769	-0.018862	0.187	0.813
L204_101181-t1	805.936	-0.104129	0.585918	0.294418	1	0
L204_101182-t1	1094.68	1.20547	3.00494e-08	1.61224	1	0
L204_101183-t1	5509.23	0.0218569	0.883636	0.424084	1	0
L204_101184-t1	1217.22	-0.530602	0.000451178	-0.143498	0	1
L204_101185-t1	500.729	-0.286522	0.0840514	0.101865	0.979	0.021
L204_101186-t1	4205.47	0.313094	0.0715226	0.707428	1	0
L204_101187-t1	17186.1	1.1254	3.16294e-11	1.51845	1	0
L204_101188-t1	207.889	0.656813	0.00159315	1.05999	1	0
L204_101189-t1	2902.93	-0.623399	4.74114e-05	-0.238493	0	1
L204_101190-t1	2118.74	-0.0154796	0.915258	0.376646	1	0
L204_101191-t1	2927.49	-0.382154	0.0126313	0.033356	0.945	0.055
L204_101192-t1	3250.6	0.0816239	0.610552	0.477936	1	0
L204_101193-t1	4691.3	-0.698185	1.64391e-07	-0.293053	0	1
L204_101194-t1	3740.95	0.152168	0.289416	0.562494	1	0
L204_101195-t1	9124.45	0.191264	0.167158	0.602029	1	0
L204_101196-t1	3502.9	-0.332192	0.0156962	0.0569719	0.998	0.002
L204_101197-t1	50619.4	-1.66846	1.83825e-43	-1.26353	0	1
L204_101198-t1	4117.79	0.179748	0.167384	0.57917	1	0
L204_101199-t1	10736.8	-0.982863	1.01118e-10	-0.596773	0	1
L204_101200-t1	463.685	0.854341	0.000353265	1.22343	1	0
L204_101201-t1	2669.12	-1.39641	1.15886e-21	-0.998318	0	1
L204_101202-t1	4159.18	0.786822	1.57131e-07	1.19331	1	0
L204_101203-t1	3060.29	0.352364	0.0244904	0.730731	1	0
L204_101204-t1	2262.3	-0.850871	2.6733e-07	-0.427531	0	1
L204_101205-t1	23734.7	-0.553266	2.35127e-06	-0.151586	0	1
L204_101206-t1	9787.32	0.0547826	0.72303	0.471458	1	0
L204_101207-t1	23470.5	-1.123	6.03485e-15	-0.720856	0	1
L204_101208-t1	12864.9	0.298044	0.0119381	0.696929	1	0
L204_101209-t1	1541.05	-0.483192	0.000443895	-0.0756558	0.007	0.993
L204_101210-t1	1957.72	-0.233559	0.191275	0.186146	1	0
L204_101211-t1	7821.33	0.294934	0.0240508	0.688503	1	0
L204_101212-t1	4056.52	-0.0734946	0.599272	0.31501	1	0
L204_101213-t1	340.463	-0.0905525	0.667171	0.311596	1	0
L204_101214-t1	7197.62	-0.0651809	0.620388	0.3353	1	0
L204_101215-t1	1346.38	-0.654198	1.29061e-05	-0.246469	0	1
L204_101216-t1	3169.97	0.409858	0.0182713	0.79698	1	0
L204_101217-t1	3708.47	-1.15381	1.17851e-21	-0.749955	0	1
L204_101218-t1	6460.27	0.0865003	0.718302	0.48725	1	0
L204_101219-t1	10273.9	0.465686	0.00519727	0.854921	1	0
L204_101220-t1	6573.29	-0.196491	0.154521	0.191234	1	0
L204_101221-t1	1994.54	-0.505504	0.00132894	-0.118253	0	1
L204_101222-t1	31335.4	3.51586	2.22128e-119	3.89783	1	0
L204_101223-t1	1528.3	0.763677	3.29532e-05	1.1507	1	0
L204_101224-t1	657.041	0.961446	1.84755e-11	1.3687	1	0
L204_101225-t1	58.1636	0.774701	0.0460784	1.14962	1	0
L204_101226-t1	36.8543	-0.224846	0.594154	0.187704	0.835	0.165
L204_101227-t1	6.3711	-0.749709	0.419564	-0.32045	0.274	0.726
L204_101228-t1	2689.61	0.301804	0.0266763	0.695299	1	0
L204_101229-t1	1576.09	0.0589677	0.710157	0.474005	1	0
L204_101230-t1	3517.67	0.00399146	0.98193	0.421705	1	0
L204_101231-t1	885.408	-1.17515	6.98542e-17	-0.782392	0	1
L204_101232-t1	3503.74	-0.640991	1.00032e-05	-0.226829	0	1
L204_101233-t1	3187.38	-0.167958	0.200454	0.234133	1	0
L204_101234-t1	3800.57	1.09151	2.09862e-12	1.4812	1	0
L204_101235-t1	3389.5	0.139027	0.349815	0.525387	1	0
L204_101236-t1	2615.19	-0.264849	0.0428171	0.134471	1	0
L204_101237-t1	1201.04	0.183854	0.215371	0.576135	1	0
L204_101238-t1	2075.6	1.64303	7.8602e-24	2.03474	1	0
L204_101239-t1	921.87	0.268426	0.109654	0.65646	1	0
L204_101240-t1	11622.7	-0.63921	1.9716e-06	-0.237356	0	1
L204_101241-t1	72.95	-0.152756	0.650981	0.261531	0.972	0.028
L204_101242-t1	346.355	0.285832	0.245111	0.688744	1	0
L204_101243-t1	1074.66	-1.57788	1.08597e-26	-1.17055	0	1
L204_101244-t1	975.281	-3.74187	1.20994e-80	-3.37305	0	1
L204_101245-t1	1436.32	-2.90639	2.06632e-73	-2.5151	0	1
L204_101246-t1	779.567	-1.74153	3.3792e-31	-1.3329	0	1
L204_101247-t1	11563.3	-0.711268	4.30981e-06	-0.302418	0	1
L204_101248-t1	8648.05	1.16521	6.43577e-15	1.56786	1	0
L204_101249-t1	496.804	-2.73232	3.36004e-38	-2.32126	0	1
L204_101250-t1	779.055	-2.39172	6.94921e-43	-1.98107	0	1
L204_101251-t1	574.825	0.723672	8.48889e-06	1.11476	1	0
L204_101252-t1	3677.69	-0.714917	5.0826e-06	-0.297579	0	1
L204_101253-t1	3170.34	0.650284	9.80257e-07	1.04987	1	0
L204_101254-t1	4857.73	-0.317251	0.0218845	0.0913816	1	0
L204_101255-t1	1194.46	0.152579	0.409805	0.563519	1	0
L204_101256-t1	1286.9	-0.561597	0.000674255	-0.185486	0	1
L204_101257-t1	1924.6	0.439393	0.00347675	0.820559	1	0
L204_101258-t1	1206.48	-0.667438	3.2211e-06	-0.25835	0	1
L204_101259-t1	5121.91	0.707666	1.80155e-06	1.12257	1	0
L204_101260-t1	19828.4	1.76296	1.06932e-39	2.14808	1	0
L204_101261-t1	4520.21	0.493513	0.00125338	0.876456	1	0
L204_101262-t1	9151.41	-0.0262408	0.874515	0.389633	1	0
L204_101263-t1	2295.46	-0.102163	0.619845	0.259749	1	0
L204_101264-t1	15109.3	0.756623	3.03305e-05	1.15076	1	0
L204_101265-t1	776.26	-0.63714	3.24713e-05	-0.245958	0	1
L204_101266-t1	1238.16	-0.5813	2.61043e-05	-0.174291	0	1
L204_101267-t1	9311.97	-0.231619	0.177652	0.154894	1	0
L204_101268-t1	3654.35	-0.857765	1.64759e-06	-0.427553	0	1
L204_101269-t1	1783.39	-0.906503	1.02688e-09	-0.512156	0	1
L204_101270-t1	2960.29	0.0406221	0.814559	0.443755	1	0
L204_101271-t1	31502.8	-2.01668	1.86075e-34	-1.62803	0	1
L204_101272-t1	1635	2.65373	2.10959e-53	3.02565	1	0
L204_101273-t1	3279	-1.09441	1.00373e-10	-0.724126	0	1
L204_101274-t1	4653.14	0.336016	0.0148848	0.73644	1	0
L204_101275-t1	4225.06	1.55598	2.89563e-34	1.96128	1	0
L204_101276-t1	6720.65	0.489616	0.000394925	0.882612	1	0
L204_101277-t1	2499.95	0.184914	0.225842	0.594185	1	0
L204_101278-t1	1375.18	0.724106	3.38148e-07	1.12451	1	0
L204_101279-t1	19709.3	0.185853	0.410536	0.602856	1	0
L204_101280-t1	945.737	0.476537	0.00372124	0.889925	1	0
L204_101281-t1	1594.75	-0.0513864	0.803182	0.346985	1	0
L204_101282-t1	1128.38	-0.0354099	0.8454	0.363093	1	0
L204_101283-t1	1510.48	-0.15349	0.328384	0.241303	1	0
L204_101284-t1	341.531	-1.00049	5.04911e-07	-0.599518	0	1
L204_101285-t1	324.815	-0.395498	0.0459106	0.00896011	0.537	0.463
L204_101286-t1	12510.4	-0.333808	0.0207813	0.074204	1	0
L204_101287-t1	9516.8	-0.141897	0.443135	0.265497	1	0
L204_101288-t1	1917.5	-0.87707	1.07359e-08	-0.474244	0	1
L204_101289-t1	14763.6	0.243596	0.0471198	0.64501	1	0
L204_101290-t1	6491.29	-2.3219	4.17728e-77	-1.91079	0	1
L204_101291-t1	8097.24	-2.37528	7.44264e-60	-1.98114	0	1
L204_101292-t1	1470.56	0.39665	0.00302962	0.789095	1	0
L204_101293-t1	1875.39	-2.83274	6.44669e-73	-2.43719	0	1
L204_101294-t1	1843.51	-0.700579	0.000222696	-0.282796	0	1
L204_101295-t1	25404	-1.14628	2.41534e-10	-0.735366	0	1
L204_101296-t1	6726.01	-0.0698863	0.682307	0.31779	1	0
L204_101297-t1	1730.71	0.484395	0.000466084	0.872797	1	0
L204_101298-t1	4311.53	0.39054	0.00161056	0.786086	1	0
L204_101299-t1	2134.31	0.324503	0.0137308	0.723104	1	0
L204_101300-t1	4912.37	3.81987	1.99633e-133	4.20144	1	0
L204_101301-t1	3592.03	0.468163	0.000759724	0.859389	1	0
L204_101302-t1	2443.02	0.460988	0.00051056	0.868837	1	0
L204_101303-t1	4529.53	0.28172	0.0727125	0.686057	1	0
L204_101304-t1	16909.7	-0.0418846	0.798006	0.362408	1	0
L204_101305-t1	23527	0.464829	0.329343	0.924647	1	0
L204_101306-t1	7625.13	-1.84149	4.39658e-31	-1.46664	0	1
L204_101307-t1	8769.64	-0.944233	1.74351e-09	-0.555355	0	1
L204_101308-t1	35392.7	-0.505008	1.84181e-05	-0.111472	0	1
L204_101309-t1	331.818	0.455733	0.0549622	0.880255	1	0
L204_101310-t1	13739	1.28273	1.67938e-18	1.68499	1	0
L204_101311-t1	3922.02	0.891895	1.33016e-10	1.27741	1	0
L204_101312-t1	1545.84	0.488096	0.00165489	0.871292	1	0
L204_101313-t1	3783.96	-1.74424	2.43238e-35	-1.35999	0	1
L204_101314-t1	5636.91	0.484681	0.0036698	0.88998	1	0
L204_101315-t1	3397.73	0.277415	0.0588511	0.668273	1	0
L204_101316-t1	2359.83	0.633846	9.63233e-06	1.02678	1	0
L204_101317-t1	1643.92	0.423177	0.00402106	0.820494	1	0
L204_101318-t1	2551.97	2.68707	2.44808e-59	3.09087	1	0
L204_101319-t1	21163.1	-2.16006	4.20479e-28	-1.76297	0	1
L204_101320-t1	1960.16	0.623737	6.15926e-05	1.03685	1	0
L204_101321-t1	9308.03	-0.433508	0.000511404	-0.0306892	0.007	0.993
L204_101322-t1	22862.2	-1.11074	4.45618e-08	-0.697543	0	1
L204_101323-t1	5542.55	-1.38954	2.97768e-08	-0.977075	0	1
L204_101324-t1	4559.14	-0.19913	0.218043	0.213727	1	0
L204_101325-t1	2996.17	-1.09226	4.24578e-12	-0.71212	0	1
L204_101326-t1	2096.8	-0.967067	9.99503e-12	-0.552525	0	1
L204_101327-t1	2012.07	-0.325262	0.0161392	0.0725175	0.999	0.001
L204_101328-t1	1457.12	-0.940052	5.83651e-10	-0.549019	0	1
L204_101329-t1	2253.67	-0.398084	0.0037946	0.00709501	0.602	0.398
L204_101330-t1	2826.24	-0.771835	2.27717e-07	-0.388906	0	1
L204_101331-t1	319.546	0.0392815	0.888482	0.453196	1	0
L204_101332-t1	6518.53	0.588998	2.18217e-06	0.985449	1	0
L204_101334-t1	3393.92	0.0930907	0.718567	0.470761	1	0
L204_101335-t1	1709.09	0.420804	0.0163945	0.822722	1	0
L204_101336-t1	6554.64	0.45363	0.00013895	0.853085	1	0
L204_101337-t1	7349.08	1.32408	7.63161e-13	1.72105	1	0
L204_101338-t1	1514.36	0.85095	0.000141724	1.23214	1	0
L204_101339-t1	7517.57	-0.254348	0.0499845	0.140504	1	0
L204_101340-t1	3264.82	-0.81621	2.73381e-07	-0.419582	0	1
L204_101341-t1	3691.28	-0.873984	6.30955e-06	-0.438548	0	1
L204_101342-t1	2345.47	-1.09378	8.28182e-13	-0.709388	0	1
L204_101343-t1	1320.71	0.71165	2.61431e-06	1.1286	1	0
L204_101344-t1	3994.72	0.461773	0.000258805	0.85728	1	0
L204_101345-t1	12855.2	0.353743	0.00744872	0.751318	1	0
L204_101346-t1	334.28	3.69015	2.77338e-41	4.09871	1	0
L204_101347-t1	17675.2	3.22481	8.82741e-86	3.63017	1	0
L204_101348-t1	2722	0.512954	0.00014891	0.910656	1	0
L204_101349-t1	2657.31	-0.669802	2.87803e-07	-0.261049	0	1
L204_101350-t1	2281.19	-0.500335	0.000312752	-0.0932086	0	1
L204_101351-t1	2691.42	-0.615618	1.42073e-05	-0.19828	0	1
L204_101352-t1	688.736	-0.495204	0.000787237	-0.0863762	0.036	0.964
L204_101353-t1	740.353	0.508383	0.00506752	0.889559	1	0
L204_101354-t1	736.458	0.45468	0.0103307	0.844112	1	0
L204_101355-t1	6885.28	0.888895	6.26529e-08	1.27471	1	0
L204_101356-t1	6887.32	-0.185984	0.236949	0.228308	1	0
L204_101357-t1	17707.2	-0.0473968	0.750646	0.36215	1	0
L204_101358-t1	3235.19	-0.0740266	0.577513	0.319109	1	0
L204_101359-t1	2289.5	0.502204	0.000779729	0.884293	1	0
L204_101360-t1	1779.6	-0.0577611	0.759263	0.368131	1	0
L204_101361-t1	3405.81	-1.15153	7.07866e-15	-0.767053	0	1
L204_101362-t1	860.708	-2.71412	1.80798e-63	-2.32718	0	1
L204_101363-t1	4468.54	0.330563	0.0277345	0.725401	1	0
L204_101364-t1	626.747	0.16526	0.387881	0.587154	1	0
L204_101365-t1	7885.97	-1.06858	1.45122e-13	-0.668755	0	1
L204_101366-t1	5962.28	-0.485416	0.0374357	-0.0455828	0.002	0.998
L204_101367-t1	3771.78	0.458874	0.000413649	0.864771	1	0
L204_101368-t1	3742.25	-0.792949	4.82388e-09	-0.399729	0	1
L204_101369-t1	4078.33	-0.1133	0.476157	0.299948	1	0
L204_101370-t1	6824.52	-0.898415	3.46962e-10	-0.515178	0	1
L204_101371-t1	4963.48	0.80672	1.0516e-08	1.21034	1	0
L204_101372-t1	4002.37	-0.380416	0.016676	0.0417616	0.985	0.015
L204_101373-t1	4155.75	1.00429	4.92523e-11	1.4053	1	0
L204_101374-t1	4744.83	0.0103419	0.948894	0.393559	1	0
L204_101375-t1	4975.28	-0.0255875	0.926908	0.35321	1	0
L204_101376-t1	6161.53	-0.99485	3.52798e-14	-0.604783	0	1
L204_101377-t1	2772.39	-0.0435003	0.787886	0.367136	1	0
L204_101378-t1	11051.4	-0.419382	0.00414113	-0.0272107	0.002	0.998
L204_101379-t1	383.661	-1.1837	3.79989e-13	-0.791531	0	1
L204_101380-t1	7050.26	-0.763737	4.24923e-07	-0.382756	0	1
L204_101381-t1	1041.44	0.0874632	0.68453	0.456175	1	0
L204_101382-t1	214.144	-0.274748	0.281526	0.125638	0.947	0.053
L204_101383-t1	6618.18	-2.28439	2.31383e-29	-1.9119	0	1
L204_101384-t1	10613.9	-0.568571	0.000232533	-0.182743	0	1
L204_101385-t1	2662.59	0.124949	0.366587	0.525287	1	0
L204_101386-t1	20518.1	0.193944	0.359185	0.585809	1	0
L204_101387-t1	5495.8	1.03513	5.20177e-12	1.42254	1	0
L204_101388-t1	13250.8	0.288894	0.023392	0.681116	1	0
L204_101389-t1	3342.02	-0.854956	1.82602e-11	-0.463549	0	1
L204_101390-t1	2175.86	0.805488	1.27425e-08	1.20836	1	0
L204_101391-t1	4424.02	-0.657092	3.38285e-07	-0.254376	0	1
L204_101392-t1	3679.96	0.135278	0.357414	0.540007	1	0
L204_101393-t1	2829.67	-0.134463	0.390508	0.2573	1	0
L204_101394-t1	15150.2	-1.07721	2.77048e-14	-0.69578	0	1
L204_101395-t1	16905.5	-0.69335	8.2535e-09	-0.28778	0	1
L204_101396-t1	3673.41	-0.76493	5.28707e-08	-0.368791	0	1
L204_101397-t1	521.324	0.881382	2.06828e-06	1.27797	1	0
L204_101398-t1	1936.42	-1.4725	7.76907e-24	-1.08467	0	1
L204_101399-t1	5052.28	0.111015	0.401823	0.512621	1	0
L204_101400-t1	7876.57	-0.548244	0.00766388	-0.112246	0	1
L204_101401-t1	6965.83	-0.0203007	0.916387	0.407625	1	0
L204_101402-t1	4741.2	-0.815098	3.97436e-10	-0.42975	0	1
L204_101403-t1	519.76	-0.202992	0.226079	0.210002	1	0
L204_101404-t1	3311.66	-0.848886	8.86508e-07	-0.420089	0	1
L204_101405-t1	810.812	0.288592	0.133258	0.699774	1	0
L204_101406-t1	5071.53	0.759572	6.35566e-08	1.15075	1	0
L204_101407-t1	498.578	1.8696	1.15044e-23	2.28227	1	0
L204_101408-t1	3031.33	0.345623	0.0679728	0.74135	1	0
L204_101409-t1	2882.82	0.972376	2.58541e-13	1.36882	1	0
L204_101410-t1	4361.25	0.607699	5.0692e-06	1.0012	1	0
L204_101411-t1	6352.55	3.25953	2.04486e-95	3.65328	1	0
L204_101412-t1	106.086	-0.727313	0.0182036	-0.317096	0.004	0.996
L204_101413-t1	991.468	-0.415951	0.0169533	-0.0257092	0.241	0.759
L204_101414-t1	2503.35	0.216377	0.273436	0.604764	1	0
L204_101415-t1	14275.7	-0.924703	1.46208e-11	-0.529951	0	1
L204_101416-t1	1201.03	-0.304468	0.148541	0.0945063	0.996	0.004
L204_101417-t1	3407.4	0.211651	0.140974	0.624251	1	0
L204_101419-t1	1926.7	0.252335	0.0485259	0.658006	1	0
L204_101420-t1	2569.1	1.01537	6.20823e-15	1.41491	1	0
L204_101421-t1	4627.92	0.537858	3.51418e-05	0.932757	1	0
L204_101422-t1	2438.68	0.0229811	0.891547	0.430135	1	0
L204_101423-t1	3771.38	0.517049	5.38265e-05	0.913263	1	0
L204_101424-t1	14711.8	1.03001	4.97218e-14	1.41666	1	0
L204_101425-t1	3237.26	-1.58533	2.72764e-35	-1.18453	0	1
L204_101426-t1	4315.42	-1.02533	9.19611e-09	-0.608582	0	1
L204_101427-t1	5869.13	-0.52095	0.00010641	-0.11526	0	1
L204_101428-t1	7207.56	1.08005	8.83395e-16	1.46753	1	0
L204_101429-t1	42850.7	-0.0941327	0.592194	0.288477	1	0
L204_101430-t1	3597.89	-0.675207	1.18961e-06	-0.289303	0	1
L204_101431-t1	1814.42	0.34783	0.0212038	0.73644	1	0
L204_101432-t1	26470.1	-0.289303	0.0773816	0.133393	1	0
L204_101433-t1	6266.78	-0.112716	0.565742	0.313408	1	0
L204_101434-t1	12712.6	-0.904771	1.38504e-11	-0.498322	0	1
L204_101435-t1	2678.16	0.297836	0.0219592	0.699569	1	0
L204_101436-t1	3103.42	0.239892	0.0697132	0.638973	1	0
L204_101437-t1	19347.9	-0.942739	4.6179e-05	-0.569209	0	1
L204_101438-t1	1542.57	1.25794	8.74683e-13	1.64282	1	0
L204_101439-t1	2252.66	0.834941	1.20273e-09	1.22658	1	0
L204_101440-t1	21120.7	0.884116	1.49381e-08	1.27426	1	0
L204_101441-t1	8459.75	-0.379432	0.0270658	0.0192607	0.931	0.069
L204_101442-t1	6537.53	0.641402	2.02946e-07	1.03529	1	0
L204_101443-t1	3283.25	0.415169	0.0305304	0.841941	1	0
L204_101444-t1	2140.64	0.639467	4.15582e-05	1.02429	1	0
L204_101445-t1	4071.93	-1.80337	4.12851e-20	-1.37591	0	1
L204_101446-t1	1107.54	0.744687	1.47528e-07	1.14405	1	0
L204_101447-t1	6087.25	3.45038	2.34374e-136	3.83842	1	0
L204_101448-t1	20249.3	1.39373	3.49982e-20	1.78952	1	0
L204_101449-t1	7656.46	-0.161034	0.198535	0.234158	1	0
L204_101450-t1	3188.42	0.286904	0.0530579	0.693311	1	0
L204_101451-t1	31830.1	-0.94605	6.35898e-08	-0.55279	0	1
L204_101452-t1	2662.08	3.71123	3.61647e-146	4.10036	1	0
L204_101453-t1	981.775	1.13521	2.32632e-11	1.53914	1	0
L204_101454-t1	2638.38	0.319529	0.0494649	0.707887	1	0
L204_101455-t1	41550.3	-0.0988268	0.620912	0.278651	1	0
L204_101456-t1	28600.9	0.389356	0.0308492	0.771683	1	0
L204_101457-t1	5261.75	0.717903	5.95007e-07	1.1147	1	0
L204_101458-t1	5535.69	1.11618	4.16748e-10	1.51036	1	0
L204_101459-t1	2463.81	-0.654924	0.000242064	-0.225633	0	1
L204_101460-t1	1489.33	0.279708	0.0905663	0.666729	1	0
L204_101461-t1	3384.95	0.506922	0.00023702	0.911116	1	0
L204_101462-t1	7230.27	0.446559	0.000668389	0.836514	1	0
L204_101463-t1	14650.1	-0.81527	1.2837e-07	-0.412901	0	1
L204_101464-t1	4878.99	-0.534206	0.000111868	-0.146329	0	1
L204_101465-t1	3336.24	0.290515	0.0640244	0.675292	1	0
L204_101466-t1	4776.37	-1.21818	3.0733e-14	-0.843309	0	1
L204_101467-t1	3651.35	0.466167	0.00690885	0.888375	1	0
L204_101468-t1	30649.4	0.0929165	0.567709	0.475126	1	0
L204_101469-t1	369.909	0.182222	0.374481	0.603625	1	0
L204_101470-t1	6004.35	0.529847	0.000169105	0.927843	1	0
L204_101471-t1	3138.96	0.561042	0.000271736	0.969093	1	0
L204_101472-t1	3275.67	0.514422	5.62757e-05	0.908375	1	0
L204_101473-t1	1202.48	-0.139778	0.360781	0.249882	1	0
L204_101474-t1	4014.03	-0.175547	0.22448	0.219227	1	0
L204_101475-t1	3020.06	0.39908	0.00310343	0.792614	1	0
L204_101476-t1	6258.29	-0.949619	1.48234e-11	-0.543189	0	1
L204_101477-t1	1529.67	0.732155	2.39294e-08	1.139	1	0
L204_101478-t1	5414.7	-0.904189	1.36522e-09	-0.50286	0	1
L204_101479-t1	7094.6	-2.36055	8.22892e-47	-1.9649	0	1
L204_101480-t1	11670	-0.607491	0.000290073	-0.216436	0	1
L204_101481-t1	13907.3	1.38543	1.76504e-22	1.80254	1	0
L204_101482-t1	94.1384	0.392321	0.202375	0.81687	1	0
L204_101483-t1	10222.6	0.110699	0.483039	0.503389	1	0
L204_101484-t1	3234.32	0.658915	5.39472e-05	1.0682	1	0
L204_101485-t1	4781.57	-0.368715	0.00892553	0.046533	0.997	0.003
L204_101486-t1	1449.04	-0.481438	0.00175742	-0.080221	0.005	0.995
L204_101487-t1	1753.96	-1.56086	4.97843e-23	-1.15192	0	1
L204_101488-t1	5265.21	1.06099	5.79218e-15	1.45284	1	0
L204_101489-t1	4457.74	0.347382	0.0245289	0.742972	1	0
L204_101490-t1	3224.28	-2.17785	4.98428e-38	-1.80402	0	1
L204_101491-t1	7345.08	-0.811567	7.61109e-11	-0.419064	0	1
L204_101492-t1	1430.48	-1.79784	6.05169e-16	-1.43733	0	1
L204_101493-t1	6140.12	0.546314	0.00215429	0.942541	1	0
L204_101494-t1	2796.5	0.858492	1.70004e-11	1.26592	1	0
L204_101495-t1	2699.91	-0.25803	0.0600966	0.148361	1	0
L204_101496-t1	29225.8	-1.10832	1.80411e-19	-0.717938	0	1
L204_101497-t1	5078.76	0.359218	0.0190694	0.740254	1	0
L204_101498-t1	3194.44	-1.35817	8.75843e-15	-0.981685	0	1
L204_101499-t1	4150.8	1.24011	3.96468e-13	1.64545	1	0
L204_101500-t1	3009.39	-0.0746772	0.633247	0.342885	1	0
L204_101501-t1	6792.07	0.667174	2.598e-05	1.07355	1	0
L204_101502-t1	1074.31	0.0976752	0.559167	0.503186	1	0
L204_101503-t1	1173	-0.16194	0.323592	0.251725	1	0
L204_101504-t1	3518.45	0.131016	0.334552	0.522227	1	0
L204_101505-t1	3074.41	3.14016	2.94884e-114	3.55017	1	0
L204_101507-t1	4068.25	-0.745795	2.76668e-05	-0.330937	0	1
L204_101508-t1	3728.53	0.532497	0.00016231	0.927737	1	0
L204_101509-t1	16789.8	-1.35243	1.79391e-24	-0.963363	0	1
L204_101510-t1	1215.17	-1.93025	1.91044e-38	-1.53692	0	1
L204_101511-t1	4710.26	-0.142677	0.311347	0.247162	1	0
L204_101512-t1	1740.97	-0.25608	0.13444	0.142819	1	0
L204_101513-t1	6973.64	-0.204225	0.105598	0.190463	1	0
L204_101514-t1	6176.31	0.142534	0.467314	0.526279	1	0
L204_101515-t1	5280.81	-0.64234	4.14879e-06	-0.230965	0	1
L204_101516-t1	10573.2	-1.18477	1.02238e-18	-0.789312	0	1
L204_101517-t1	6688.2	-0.570669	0.00146387	-0.139915	0	1
L204_101518-t1	241.427	-0.765983	0.000737596	-0.337734	0	1
L204_101519-t1	20168.2	-0.00513464	0.980713	0.372974	1	0
L204_101520-t1	39124.8	-0.584854	6.78677e-06	-0.173678	0	1
L204_101521-t1	7276.31	0.553425	0.000107885	0.946544	1	0
L204_101522-t1	3044.67	0.763467	9.10251e-07	1.15873	1	0
L204_101523-t1	5487.4	0.578986	2.35581e-05	0.970419	1	0
L204_101524-t1	2280.54	0.0605768	0.69491	0.462031	1	0
L204_101525-t1	35353.6	-0.339853	0.0127453	0.0483059	1	0
L204_101526-t1	24210.6	0.722742	0.000709708	1.09049	1	0
L204_101527-t1	11144.9	-1.1242	5.12943e-19	-0.722615	0	1
L204_101528-t1	2418.15	-1.10498	1.24131e-13	-0.718587	0	1
L204_101529-t1	3198.69	0.284813	0.0467828	0.674388	1	0
L204_101530-t1	3941.39	0.181027	0.146975	0.585626	1	0
L204_101531-t1	8353.51	-0.367497	0.00688526	0.0364963	0.998	0.002
L204_101532-t1	8854.31	0.187327	0.124842	0.582941	1	0
L204_101533-t1	3151.03	0.17943	0.283168	0.567555	1	0
L204_101534-t1	7845	1.23124	9.49912e-20	1.61921	1	0
L204_101535-t1	10613.7	0.93104	7.21045e-14	1.33933	1	0
L204_101537-t1	1268.64	-0.0199072	0.904522	0.378412	1	0
L204_101538-t1	3425.8	-2.14911	4.8391e-40	-1.76808	0	1
L204_101539-t1	71150.5	-2.57063	1.75466e-58	-2.18351	0	1
L204_101540-t1	2882.06	-0.807269	2.19898e-08	-0.398361	0	1
L204_101541-t1	3610.24	0.654195	4.18581e-06	1.06075	1	0
L204_101542-t1	1651.1	-0.560215	0.000366029	-0.176935	0	1
L204_101543-t1	4947.94	0.918027	2.09076e-12	1.31415	1	0
L204_101544-t1	20220.4	0.0806479	0.747133	0.455965	1	0
L204_101545-t1	3087.24	0.297118	0.101149	0.682223	1	0
L204_101546-t1	1171.35	2.57768	3.69196e-50	2.95637	1	0
L204_101547-t1	5888.75	-1.09194	1.21105e-13	-0.69901	0	1
L204_101548-t1	2887.66	-1.33223	1.65608e-21	-0.926212	0	1
L204_101549-t1	2844.19	-0.558951	1.36818e-05	-0.153053	0	1
L204_101550-t1	11405.2	3.01711	2.5251e-102	3.40911	1	0
L204_101551-t1	1271.26	1.18528	8.2612e-08	1.6191	1	0
L204_101552-t1	8537.56	-0.210154	0.160271	0.179562	1	0
L204_101553-t1	4573.55	0.117054	0.366587	0.521543	1	0
L204_101554-t1	1722.76	0.755882	1.17798e-05	1.14547	1	0
L204_101555-t1	47466.7	-0.551375	0.00139527	-0.143877	0	1
L204_101556-t1	309.166	-0.355075	0.046612	0.0329613	0.706	0.294
L204_101557-t1	9551.46	-0.484044	0.0102255	-0.0957894	0	1
L204_101558-t1	4828.96	0.531437	8.21786e-05	0.933875	1	0
L204_101559-t1	14575.1	-0.567821	0.000475962	-0.181472	0	1
L204_101560-t1	3176.94	-0.392644	0.0116731	0.0137409	0.757	0.243
L204_101561-t1	8731.4	-0.320205	0.0402095	0.0794293	1	0
L204_101562-t1	3279.47	0.157208	0.247168	0.547864	1	0
L204_101563-t1	4536.37	-0.102918	0.451249	0.292888	1	0
L204_101564-t1	6502.18	0.0607079	0.728281	0.473932	1	0
L204_101565-t1	9847.57	1.33761	4.27515e-24	1.73226	1	0
L204_101566-t1	1345.03	1.33342	9.654e-19	1.72541	1	0
L204_101567-t1	4738.1	0.291586	0.0584109	0.691775	1	0
L204_101568-t1	2350.54	-1.08194	4.27618e-15	-0.689881	0	1
L204_101569-t1	2549.73	-1.46603	3.35875e-22	-1.07444	0	1
L204_101570-t1	4790.59	-1.06566	1.52804e-09	-0.691588	0	1
L204_101571-t1	6236	-2.83371	2.82279e-92	-2.44779	0	1
L204_101572-t1	1570.48	-0.485633	0.00598828	-0.0823347	0	1
L204_101573-t1	9033.93	-0.640142	2.57517e-06	-0.239557	0	1
L204_101574-t1	4637.48	0.0740669	0.568265	0.46949	1	0
L204_101575-t1	4900.68	0.937345	1.95551e-14	1.33543	1	0
L204_101576-t1	98584	-1.1828	1.94816e-12	-0.794387	0	1
L204_101577-t1	1119.48	-1.62623	5.01005e-21	-1.20619	0	1
L204_101578-t1	178.238	-1.89667	1.03467e-16	-1.49056	0	1
L204_101579-t1	79.2426	-1.08073	0.000259651	-0.707207	0	1
L204_101580-t1	168.438	-0.129548	0.61855	0.275698	1	0
L204_101581-t1	52361.6	-1.5412	3.26896e-18	-1.12292	0	1
L204_101582-t1	22836.7	1.38799	1.24698e-16	1.76651	1	0
L204_101583-t1	3105.42	0.592175	0.0103634	0.957298	1	0
L204_101584-t1	20805.9	-0.918365	8.14813e-10	-0.53043	0	1
L204_101585-t1	9616.87	0.105384	0.478839	0.51923	1	0
L204_101586-t1	8308.71	-0.304523	0.0408828	0.0907315	1	0
L204_101587-t1	6016.55	0.0856192	0.606713	0.469094	1	0
L204_101588-t1	3819.12	-0.414552	0.0502595	-0.0334124	0.041	0.959
L204_101589-t1	2469.1	-0.790426	1.11789e-06	-0.369472	0	1
L204_101590-t1	9679.44	3.10238	1.03961e-86	3.47971	1	0
L204_101591-t1	1401.65	0.392597	0.00414176	0.791281	1	0
L204_101592-t1	794.408	0.272545	0.0931656	0.67007	1	0
L204_101593-t1	1628.19	0.758371	4.16284e-07	1.17179	1	0
L204_101594-t1	3154.97	-0.208355	0.155909	0.202524	1	0
L204_101595-t1	1754.23	0.887184	2.3739e-10	1.27403	1	0
L204_101596-t1	4178.75	-0.101303	0.504664	0.312189	1	0
L204_101597-t1	34308.8	-0.776927	0.00172187	-0.417045	0	1
L204_101598-t1	1543.19	0.550733	0.000202411	0.940264	1	0
L204_101599-t1	7220.45	0.50014	0.0229406	0.885246	1	0
L204_101600-t1	4627.6	0.0798945	0.58079	0.485035	1	0
L204_101601-t1	5537.31	0.177645	0.170232	0.580966	1	0
L204_101602-t1	4542.8	-0.348948	0.0150816	0.0514278	0.998	0.002
L204_101603-t1	87.7295	1.62522	2.21707e-08	2.02826	1	0
L204_101604-t1	75.0515	2.72011	6.07539e-17	3.11988	1	0
L204_101605-t1	1884.68	0.330296	0.102365	0.76534	1	0
L204_101606-t1	243.629	0.111687	0.58865	0.52681	1	0
L204_101607-t1	470.72	0.0473172	0.807863	0.458309	1	0
L204_101608-t1	371.711	0.29326	0.102943	0.685707	1	0
L204_101609-t1	795.57	-0.117302	0.542735	0.306426	1	0
L204_101610-t1	3325.76	-0.974039	6.51896e-14	-0.576532	0	1
L204_101611-t1	1697.58	-0.377464	0.0212417	0.0200292	0.798	0.202
L204_101612-t1	26936.2	-2.92844	7.26538e-53	-2.51152	0	1
L204_101613-t1	4561.91	-2.76422	8.44338e-75	-2.37581	0	1
L204_101614-t1	2052.06	-0.201818	0.166904	0.188338	1	0
L204_101615-t1	2294.64	-0.131297	0.544377	0.284798	1	0
L204_101616-t1	1544.33	0.345496	0.0106736	0.74129	1	0
L204_101617-t1	6141.4	0.0859032	0.563485	0.492222	1	0
L204_101618-t1	28.2661	0.200669	0.687871	0.640852	1	0
L204_101619-t1	75040.7	-0.563373	3.92872e-06	-0.162635	0	1
L204_101620-t1	19943.8	-0.978324	2.08496e-09	-0.588498	0	1
L204_101621-t1	1861.05	-0.287685	0.0323978	0.110443	1	0
L204_101622-t1	983.698	0.268614	0.21602	0.674379	1	0
L204_101623-t1	3838.95	0.913945	7.90006e-08	1.31089	1	0
L204_101624-t1	2163.64	1.03536	2.49971e-11	1.44459	1	0
L204_101625-t1	2748.41	0.386496	0.0113286	0.766341	1	0
L204_101626-t1	8463.54	0.730094	1.57856e-07	1.11632	1	0
L204_101627-t1	5691.21	0.233716	0.0893339	0.638741	1	0
L204_101628-t1	5015.68	-1.03485	8.54639e-15	-0.62083	0	1
L204_101629-t1	2425.73	-0.993396	3.58563e-15	-0.589064	0	1
L204_101630-t1	5194.56	0.318176	0.0112692	0.710913	1	0
L204_101631-t1	4859.74	-1.48167	1.47751e-27	-1.08851	0	1
L204_101632-t1	3476.09	-1.57385	3.3096e-29	-1.16335	0	1
L204_101633-t1	2409.12	-0.24575	0.0621724	0.15004	1	0
L204_101634-t1	5270.74	-0.924201	7.80462e-12	-0.525858	0	1
L204_101635-t1	191.438	-0.822048	0.000185127	-0.400308	0	1
L204_101636-t1	2317.31	-1.38359	4.27617e-23	-0.996982	0	1
L204_101637-t1	2532.25	1.78445	1.39075e-18	2.18172	1	0
L204_101638-t1	2345.79	-0.311149	0.096881	0.110965	1	0
L204_101639-t1	4609.27	-2.53217	2.539e-26	-2.09965	0	1
L204_101640-t1	1822.92	-0.35627	0.0208153	0.0626605	0.989	0.011
L204_101641-t1	30523.1	-1.66925	2.38147e-36	-1.26388	0	1
L204_101642-t1	3916.13	0.34518	0.0124637	0.752055	1	0
L204_101643-t1	4037.93	-0.162675	0.471231	0.272525	1	0
L204_101644-t1	2768.68	0.316288	0.147641	0.699143	1	0
L204_101645-t1	13507.7	-0.255515	0.0816478	0.136218	1	0
L204_101646-t1	2664.6	0.18233	0.232174	0.586818	1	0
L204_101647-t1	40192.9	-0.684561	6.52422e-06	-0.267452	0	1
L204_101648-t1	1386.66	0.448804	0.00236744	0.845984	1	0
L204_101649-t1	522.129	0.393294	0.00835386	0.793072	1	0
L204_101650-t1	4720.43	0.234294	0.0855851	0.630238	1	0
L204_101651-t1	2703.6	0.485951	0.00185764	0.873483	1	0
L204_101652-t1	6857.98	-0.397593	0.00145025	-0.00524188	0.379	0.621
L204_101653-t1	2305.69	0.113081	0.419229	0.511013	1	0
L204_101654-t1	1291.08	0.533763	0.000133054	0.926645	1	0
L204_101655-t1	9514.82	-1.072	1.02993e-12	-0.6636	0	1
L204_101656-t1	2785.38	-0.114128	0.476525	0.292063	1	0
L204_101657-t1	821.476	1.43255	5.49559e-20	1.83352	1	0
L204_101658-t1	6533.13	2.17844	3.11418e-06	2.59303	1	0
L204_101659-t1	4099.8	0.296124	0.110105	0.672	1	0
L204_101660-t1	25875.5	-2.03746	3.0831e-28	-1.65387	0	1
L204_101661-t1	16479.4	0.126655	0.316297	0.529661	1	0
L204_101662-t1	7521.21	2.25077	1.28605e-28	2.6434	1	0
L204_101663-t1	11553	0.59516	1.12048e-06	0.987605	1	0
L204_101664-t1	4291.72	-1.27781	1.04382e-16	-0.900111	0	1
L204_101665-t1	9216.35	0.779674	4.06332e-08	1.17416	1	0
L204_101666-t1	26885.5	-1.74995	9.07564e-34	-1.35505	0	1
L204_101667-t1	4513.58	-0.1774	0.24273	0.228172	1	0
L204_101668-t1	12218	0.310645	0.0106486	0.703818	1	0
L204_101669-t1	2040.53	0.729879	1.8236e-05	1.11656	1	0
L204_101670-t1	3620.74	0.542149	0.000137102	0.950797	1	0
L204_101671-t1	5093.49	0.975328	9.40407e-13	1.36738	1	0
L204_101672-t1	4122.98	1.11891	3.43069e-16	1.51238	1	0
L204_101673-t1	4960.78	-0.542693	6.23822e-05	-0.139024	0	1
L204_101674-t1	11560.6	-0.409933	0.0189064	0.0177082	0.949	0.051
L204_101675-t1	1466.14	-0.0316354	0.847031	0.352578	1	0
L204_101677-t1	3347.21	0.889869	1.83251e-08	1.27604	1	0
L204_101678-t1	2769.65	0.117381	0.489417	0.502982	1	0
L204_101679-t1	2680.78	-0.805555	1.28535e-11	-0.406188	0	1
L204_101680-t1	3056.83	0.761319	1.27824e-05	1.15118	1	0
L204_101681-t1	5304.69	0.364841	0.00980689	0.750281	1	0
L204_101682-t1	4960.83	-0.30859	0.0189554	0.0950602	1	0
L204_101683-t1	5786.92	-2.23641	8.63327e-42	-1.82749	0	1
L204_101685-t1	7621.19	0.497218	7.83338e-05	0.886488	1	0
L204_101686-t1	3580.65	0.728866	1.17884e-07	1.11511	1	0
L204_101687-t1	18265.7	-0.862322	2.34297e-09	-0.479862	0	1
L204_101688-t1	7062.28	0.0426263	0.778509	0.430317	1	0
L204_101689-t1	3336.13	0.226931	0.158525	0.616508	1	0
L204_101690-t1	2306.59	0.0545747	0.805831	0.462	1	0
L204_101691-t1	4111.33	-0.208735	0.149085	0.177242	1	0
L204_101692-t1	4966.71	0.693747	3.2967e-05	1.09653	1	0
L204_101693-t1	2757.67	0.77952	0.000129161	1.19563	1	0
L204_101694-t1	22476.8	-0.707386	1.45353e-07	-0.293841	0	1
L204_101695-t1	1905.69	-1.03208	5.45507e-14	-0.628839	0	1
L204_101696-t1	2495.47	-0.00600076	0.977573	0.417423	1	0
L204_101697-t1	3726.57	1.19071	2.911e-14	1.57268	1	0
L204_101698-t1	16789.2	1.185	0.00637845	1.53182	1	0
L204_101699-t1	4928.58	-2.03185	1.45935e-40	-1.60837	0	1
L204_101700-t1	9822.07	0.664167	9.31303e-07	1.05904	1	0
L204_101701-t1	86.9819	0.5249	0.0623938	0.940467	1	0
L204_101702-t1	1715.36	0.781674	3.28417e-09	1.17985	1	0
L204_101703-t1	27523.7	0.721266	3.47292e-06	1.11043	1	0
L204_101704-t1	710.465	1.13868	5.11957e-08	1.5501	1	0
L204_101705-t1	4408.32	0.872137	6.79422e-12	1.26586	1	0
L204_101706-t1	650.548	-1.08737	2.0846e-12	-0.677287	0	1
L204_101707-t1	2102.7	0.25638	0.0547995	0.646835	1	0
L204_101709-t1	1159.55	0.177336	0.250515	0.570987	1	0
L204_101710-t1	1768.03	0.0303927	0.85149	0.435415	1	0
L204_101711-t1	4157.57	0.103779	0.454653	0.506886	1	0
L204_101712-t1	4825.4	0.79819	2.24024e-08	1.20636	1	0
L204_101713-t1	1368.84	-1.27983	4.91953e-13	-0.89061	0	1
L204_101714-t1	3757.51	-0.884857	3.88259e-07	-0.514814	0	1
L204_101715-t1	4736.57	0.341115	0.0219547	0.734638	1	0
L204_101716-t1	3824.66	-0.77138	3.21964e-08	-0.37931	0	1
L204_101717-t1	3127.54	0.977985	1.17914e-10	1.36135	1	0
L204_101718-t1	285.623	-0.317317	0.0874623	0.0927081	0.903	0.097
L204_101719-t1	3511.27	1.1696	2.59383e-15	1.58271	1	0
L204_101720-t1	6329.8	0.841307	5.03297e-12	1.23948	1	0
L204_101721-t1	19170.1	-1.39765	5.49224e-18	-0.979001	0	1
L204_101722-t1	2173.6	0.821528	1.54918e-05	1.22704	1	0
L204_101723-t1	8856.56	0.599712	0.0152925	0.982904	1	0
L204_101724-t1	2366.42	0.505793	0.000432221	0.909205	1	0
L204_101725-t1	137.989	-1.01727	8.59403e-05	-0.63345	0	1
L204_101726-t1	9908.92	1.33234	2.35205e-24	1.7183	1	0
L204_101727-t1	30734.9	0.732402	2.79736e-08	1.12961	1	0
L204_101728-t1	74138.3	0.358034	0.0494742	0.734179	1	0
L204_101729-t1	17650.7	-1.01913	1.27759e-07	-0.589495	0	1
L204_101730-t1	1179.97	0.0583469	0.727437	0.451003	1	0
L204_101731-t1	4535.83	0.62361	7.69817e-05	1.00803	1	0
L204_101732-t1	2889.38	-0.041604	0.795997	0.358059	1	0
L204_101733-t1	3540.97	0.512751	0.000959242	0.915888	1	0
L204_101734-t1	3605.09	-0.952112	3.49878e-12	-0.544713	0	1
L204_101735-t1	3569.8	0.370535	0.0107872	0.752475	1	0
L204_101736-t1	3457.05	-0.229933	0.141345	0.179193	1	0
L204_101737-t1	3665.19	-1.3191	1.84384e-19	-0.936892	0	1
L204_101738-t1	6234.5	2.04269	2.90879e-39	2.43469	1	0
L204_101739-t1	5855.6	-0.591825	1.58939e-05	-0.176948	0	1
L204_101740-t1	10998.8	-0.764019	5.0383e-07	-0.355952	0	1
L204_101741-t1	10113	-0.700079	0.000611279	-0.325778	0	1
L204_101742-t1	1921.92	0.318827	0.0455369	0.706314	1	0
L204_101743-t1	6090.03	0.758237	3.86892e-07	1.1499	1	0
L204_101744-t1	589.707	0.37631	0.0563826	0.767078	1	0
L204_101745-t1	3780.94	1.20161	2.02409e-15	1.58472	1	0
L204_101746-t1	2493.51	-1.60822	5.15729e-23	-1.23354	0	1
L204_101747-t1	98.6835	0.754643	0.00166119	1.14021	1	0
L204_101748-t1	30595.6	0.411665	0.0149747	0.789487	1	0
L204_101749-t1	5436.25	-1.39849	8.85058e-22	-0.987707	0	1
L204_101750-t1	518.459	0.0342219	0.875619	0.454513	1	0
L204_101751-t1	852.321	-0.385047	0.0121956	0.0208115	0.728	0.272
L204_101752-t1	1329.98	-1.30544	7.01913e-13	-0.906082	0	1
L204_101754-t1	2823.26	0.640395	0.00170391	1.06025	1	0
L204_101755-t1	14412.1	-0.472401	0.000593861	-0.0864169	0	1
L204_101756-t1	2128.99	0.191693	0.154521	0.597793	1	0
L204_101757-t1	4343.63	0.823109	1.39581e-08	1.22105	1	0
L204_101759-t1	14867.2	-0.999534	7.92507e-09	-0.577044	0	1
L204_101760-t1	5723.07	-1.93294	1.16131e-43	-1.52931	0	1
L204_101761-t1	1008	2.02636	2.11346e-14	2.43858	1	0
L204_101762-t1	6171.3	1.44189	3.55362e-22	1.83153	1	0
L204_101764-t1	1926.86	2.66254	3.65613e-37	3.07263	1	0
L204_101765-t1	9051.25	0.555413	0.000982555	0.963489	1	0
L204_101766-t1	8638.58	-0.837895	1.07289e-09	-0.430039	0	1
L204_101767-t1	6341.61	0.584839	1.00032e-05	0.993124	1	0
L204_101768-t1	629.231	-0.34448	0.107975	0.0272815	0.718	0.282
L204_101769-t1	838.245	0.471277	0.0618924	0.861971	1	0
L204_101770-t1	4502.65	-2.24654	7.59461e-46	-1.85196	0	1
L204_101771-t1	6558.3	-2.00167	2.79878e-43	-1.58263	0	1
L204_101772-t1	1637.72	-0.0232953	0.878858	0.369327	1	0
L204_101773-t1	8055.55	-0.626512	0.000370696	-0.221011	0	1
L204_101774-t1	3449.1	0.709937	2.78357e-05	1.08919	1	0
L204_101775-t1	876.911	1.95764	5.15866e-31	2.3334	1	0
L204_101776-t1	1580.46	0.981329	4.48388e-10	1.38485	1	0
L204_101777-t1	11905.4	2.76455	1.01481e-96	3.15806	1	0
L204_101778-t1	7868.18	0.592781	1.39964e-05	0.980091	1	0
L204_101779-t1	12033.2	0.143247	0.482746	0.528931	1	0
L204_101780-t1	820.325	-1.06596	1.88103e-12	-0.66602	0	1
L204_101781-t1	702.336	0.696248	3.25399e-05	1.11018	1	0
L204_101782-t1	1353.58	-1.0894	9.33541e-13	-0.689541	0	1
L204_101783-t1	1670.09	0.405583	0.00430245	0.796706	1	0
L204_101784-t1	410.328	0.822605	6.51555e-06	1.22663	1	0
L204_101785-t1	723.539	1.27556	7.73265e-16	1.66273	1	0
L204_101786-t1	9066.88	-0.121875	0.351036	0.282025	1	0
L204_101787-t1	4474.41	0.67246	5.33903e-06	1.05905	1	0
L204_101788-t1	293.904	0.871503	5.02539e-05	1.26262	1	0
L204_101789-t1	22316.5	0.384147	0.0503486	0.764813	1	0
L204_101790-t1	17877.6	-0.108165	0.425295	0.30167	1	0
L204_101791-t1	3450.59	-1.08213	4.27829e-14	-0.669399	0	1
L204_101792-t1	1894.34	1.14576	1.52171e-14	1.53724	1	0
L204_101793-t1	10515.5	0.409391	0.000674255	0.804665	1	0
L204_101794-t1	1941.24	0.645078	7.06427e-06	1.0513	1	0
L204_101795-t1	9185.68	0.124935	0.447828	0.520417	1	0
L204_101796-t1	4321.72	-0.212126	0.13484	0.180275	1	0
L204_101797-t1	3949.68	-0.355692	0.00759117	0.047678	0.991	0.009
L204_101798-t1	8282.71	0.251078	0.144714	0.636673	1	0
L204_101799-t1	1264.36	0.10793	0.473406	0.506175	1	0
L204_101800-t1	15892.5	-2.116	3.04595e-43	-1.73001	0	1
L204_101801-t1	2120.92	0.117826	0.3905	0.515874	1	0
L204_101802-t1	1238.22	-0.730561	1.54179e-05	-0.336123	0	1
L204_101803-t1	779.223	0.461576	0.0144361	0.837733	1	0
L204_101804-t1	2929.07	1.44009	1.17902e-17	1.82943	1	0
L204_101805-t1	20668.9	-0.108896	0.480414	0.277759	1	0
L204_101806-t1	6109.4	-1.04111	5.99368e-12	-0.626364	0	1
L204_101807-t1	1862.03	-1.08054	1.58353e-11	-0.667402	0	1
L204_101808-t1	4221.34	0.227553	0.168116	0.629706	1	0
L204_101809-t1	2387.14	-0.335701	0.0505013	0.0545846	0.99	0.01
L204_101810-t1	12684.5	0.0330191	0.841458	0.420035	1	0
L204_101811-t1	2069.08	0.325192	0.0183707	0.718175	1	0
L204_101812-t1	6172.11	0.45105	0.00563709	0.862241	1	0
L204_101813-t1	3969.79	0.239419	0.0533661	0.641934	1	0
L204_101814-t1	5927.92	0.0268266	0.872721	0.409255	1	0
L204_101815-t1	132.261	0.451258	0.0782951	0.835609	1	0
L204_101817-t1	2737.14	0.957562	2.78372e-12	1.35101	1	0
L204_101818-t1	8253.41	0.272765	0.0379764	0.665365	1	0
L204_101819-t1	1446.6	-0.0300497	0.85392	0.369651	1	0
L204_101820-t1	3116.12	-1.37645	2.71905e-20	-0.989233	0	1
L204_101821-t1	994.094	1.44048	2.23882e-17	1.86021	1	0
L204_101822-t1	60006.9	-0.285008	0.0443244	0.103988	1	0
L204_101823-t1	649.841	-3.13003	4.66271e-59	-2.73431	0	1
L204_101824-t1	902.554	-0.462609	0.00162321	-0.0614168	0.054	0.946
L204_101825-t1	518.706	-0.169183	0.42294	0.252246	1	0
L204_101826-t1	4627.64	1.14337	2.26287e-12	1.51936	1	0
L204_101827-t1	5194.38	0.914359	3.28479e-08	1.30092	1	0
L204_101828-t1	2729.88	-0.933702	5.61812e-14	-0.540761	0	1
L204_101829-t1	2191.46	0.34092	0.00776174	0.739468	1	0
L204_101830-t1	7304.34	-1.17529	1.36029e-12	-0.803194	0	1
L204_101831-t1	4492.79	-0.327121	0.0551662	0.0982578	1	0
L204_101832-t1	10426.4	-0.223575	0.0780001	0.168616	1	0
L204_101833-t1	1576.73	2.02607	6.94921e-43	2.42106	1	0
L204_101834-t1	4991.5	-0.00916748	0.957438	0.410157	1	0
L204_101835-t1	55745.4	-0.67077	0.170246	-0.32023	0	1
L204_101836-t1	266231	-2.99723	8.11151e-113	-2.61377	0	1
L204_101837-t1	7103.14	-0.339881	0.0122105	0.0522211	0.999	0.001
L204_101838-t1	5199.75	-1.0392	7.05158e-11	-0.620192	0	1
L204_101839-t1	1834.57	0.033836	0.824873	0.426007	1	0
L204_101840-t1	2996.91	-1.00217	7.91595e-15	-0.590425	0	1
L204_101841-t1	1177.82	-0.0779169	0.598086	0.317269	1	0
L204_101842-t1	9980.34	-1.78753	4.04925e-29	-1.36115	0	1
L204_101843-t1	8717.49	-0.989632	1.24983e-09	-0.60612	0	1
L204_101844-t1	248.846	-3.01635	2.41373e-36	-2.63286	0	1
L204_101845-t1	2980.34	-3.08147	2.51345e-66	-2.71379	0	1
L204_101846-t1	20825.8	-1.49126	8.22561e-20	-1.08915	0	1
L204_101847-t1	9238.95	0.159066	0.289574	0.555522	1	0
L204_101848-t1	8266.03	0.0172122	0.903417	0.421511	1	0
L204_101849-t1	2700.52	-1.93287	4.96245e-36	-1.5521	0	1
L204_101850-t1	1969.95	0.0466032	0.743529	0.446902	1	0
L204_101851-t1	25726.3	-0.166316	0.21919	0.22362	1	0
L204_101852-t1	3421.85	-0.449038	0.000871933	-0.0492265	0.002	0.998
L204_101853-t1	3662.87	1.29245	1.11674e-24	1.69046	1	0
L204_101854-t1	7281.41	0.333786	0.0211399	0.743558	1	0
L204_101855-t1	970.983	-0.809161	1.73016e-05	-0.397584	0	1
L204_101856-t1	3456.56	0.620098	4.24991e-06	1.02719	1	0
L204_101857-t1	1659.32	0.610981	3.95233e-06	1.00739	1	0
L204_101858-t1	2469.42	0.491694	0.00763049	0.877085	1	0
L204_101859-t1	4176.06	0.162891	0.292758	0.551472	1	0
L204_101860-t1	2995.93	1.0486	1.01691e-13	1.44408	1	0
L204_101861-t1	2802.57	-0.00438967	0.97876	0.386888	1	0
L204_101862-t1	1349.67	-0.0540719	0.708958	0.35104	1	0
L204_101863-t1	1356.73	0.227574	0.14309	0.616753	1	0
L204_101864-t1	3985.5	0.110215	0.465438	0.516247	1	0
L204_101865-t1	2962.02	-1.09443	5.3443e-12	-0.67568	0	1
L204_101866-t1	12194.9	1.99285	3.00735e-19	2.35638	1	0
L204_101867-t1	7766.06	0.673679	8.90043e-07	1.07357	1	0
L204_101868-t1	1982.27	0.95756	1.04075e-11	1.34784	1	0
L204_101869-t1	2502.42	0.310428	0.0391362	0.698352	1	0
L204_101870-t1	1609.94	-0.0546541	0.743529	0.334683	1	0
L204_101871-t1	4308.49	0.428622	0.00776428	0.815272	1	0
L204_101872-t1	9229.26	0.481722	0.000825371	0.8658	1	0
L204_101873-t1	2886.41	0.194992	0.173833	0.605134	1	0
L204_101874-t1	10508.9	-0.583889	1.67242e-06	-0.189059	0	1
L204_101875-t1	581.767	0.29392	0.122368	0.67946	1	0
L204_101876-t1	270.249	0.278146	0.205488	0.69274	1	0
L204_101877-t1	1644.16	0.566916	2.52378e-05	0.974103	1	0
L204_101878-t1	17188	0.481072	0.00597221	0.868023	1	0
L204_101879-t1	4249.04	-1.27947	9.41653e-13	-0.86595	0	1
L204_101880-t1	4272.09	-1.13324	2.96885e-12	-0.715568	0	1
L204_101881-t1	9732.96	0.887706	8.89321e-14	1.28563	1	0
L204_101882-t1	5816.1	-0.739457	1.25893e-06	-0.338316	0	1
L204_101883-t1	1579.75	0.562173	3.92641e-05	0.954784	1	0
L204_101884-t1	1933.54	-0.969633	5.35641e-07	-0.583712	0	1
L204_101885-t1	1954.69	0.167797	0.230861	0.561028	1	0
L204_101886-t1	4561.53	-0.102134	0.49598	0.28824	1	0
L204_101887-t1	5551.46	1.1509	1.51303e-21	1.55333	1	0
L204_101888-t1	6793.63	-0.321144	0.0179891	0.0657929	1	0
L204_101889-t1	5884.86	-1.42036	2.81778e-28	-1.01436	0	1
L204_101890-t1	10233.2	0.561565	4.58874e-05	0.958123	1	0
L204_101891-t1	6044.08	0.229917	0.119238	0.625691	1	0
L204_101892-t1	12441.6	-2.9977	3.86239e-91	-2.58723	0	1
L204_101893-t1	4613.57	-0.0484841	0.760266	0.346872	1	0
L204_101894-t1	16542.6	-3.26932	8.4171e-97	-2.87933	0	1
L204_101895-t1	2966.89	-0.369807	0.00420207	0.0317763	0.925	0.075
L204_101896-t1	8652.55	0.265348	0.124895	0.659842	1	0
L204_101897-t1	2067.1	0.89442	6.58925e-11	1.28315	1	0
L204_101898-t1	3529.06	0.172753	0.438299	0.547558	1	0
L204_101899-t1	9715.05	0.12962	0.597047	0.510233	1	0
L204_101900-t1	2817.78	-0.0817663	0.602713	0.32948	1	0
L204_101901-t1	2723.79	-0.381413	0.0129102	0.018563	0.797	0.203
L204_101902-t1	7979.89	-2.09687	1.23079e-23	-1.66235	0	1
L204_101903-t1	48470.2	-1.39782	3.26812e-12	-0.973516	0	1
L204_101904-t1	3390.91	-0.0305409	0.869981	0.385343	1	0
L204_101905-t1	1910.18	-0.783984	1.13642e-06	-0.387164	0	1
L204_101906-t1	4861.92	-0.873324	2.80957e-08	-0.467572	0	1
L204_101907-t1	3233.16	-1.45486	5.03677e-27	-1.05926	0	1
L204_101908-t1	4055.19	-0.337801	0.007683	0.0541261	0.998	0.002
L204_101909-t1	2758.61	0.348293	0.00472504	0.744506	1	0
L204_101910-t1	4759.54	-0.342066	0.0187627	0.0424903	0.998	0.002
L204_101911-t1	3393.55	0.222015	0.126783	0.626047	1	0
L204_101912-t1	4048.32	0.932042	1.13068e-11	1.32578	1	0
L204_101913-t1	6148.08	-1.42994	9.55788e-20	-1.00518	0	1
L204_101914-t1	766.275	-0.592706	0.00459502	-0.160365	0	1
L204_101915-t1	9057.72	0.552089	0.0107847	0.92117	1	0
L204_101916-t1	3454.26	-0.87645	1.46613e-06	-0.498476	0	1
L204_101917-t1	4038.62	0.736108	5.4607e-07	1.12895	1	0
L204_101918-t1	2029.9	-0.82417	1.95077e-08	-0.414785	0	1
L204_101919-t1	2122.94	0.308196	0.079772	0.715067	1	0
L204_101920-t1	956.659	0.554441	0.000127755	0.944731	1	0
L204_101921-t1	3813.11	1.2265	6.15471e-12	1.63011	1	0
L204_101922-t1	4144.25	0.607233	6.554e-07	1.00218	1	0
L204_101923-t1	1273.23	0.619184	0.000176265	1.00328	1	0
L204_101924-t1	3337.44	-0.334957	0.0379683	0.0768053	1	0
L204_101925-t1	1898.74	0.88285	5.09565e-11	1.27577	1	0
L204_101926-t1	1486.59	0.626173	6.07121e-05	1.02164	1	0
L204_101927-t1	1320.51	-0.696341	1.53119e-06	-0.294418	0	1
L204_101928-t1	3066.44	0.735862	7.0932e-06	1.12875	1	0
L204_101929-t1	3079.26	-0.0465907	0.775688	0.336101	1	0
L204_101930-t1	588.335	0.22931	0.126771	0.633971	1	0
L204_101931-t1	4622.18	-0.536839	5.20747e-05	-0.131603	0	1
L204_101932-t1	942.085	-0.342937	0.0268309	0.055279	0.919	0.081
L204_101933-t1	4305.73	-1.00798	2.36997e-08	-0.578089	0	1
L204_101934-t1	16727.8	-1.63527	2.34054e-12	-1.28082	0	1
L204_101935-t1	757.454	0.173785	0.333916	0.588747	1	0
L204_101936-t1	2515.26	-0.046238	0.779373	0.342202	1	0
L204_101937-t1	4809.72	1.25213	1.50345e-13	1.65353	1	0
L204_101938-t1	1161.72	2.40045	1.4285e-45	2.80548	1	0
L204_101939-t1	4876.21	0.249133	0.101874	0.662078	1	0
L204_101940-t1	1831.83	-0.24098	0.0797717	0.152988	1	0
L204_101941-t1	1835.62	-0.0769699	0.616452	0.318658	1	0
L204_101942-t1	2962.43	-0.205155	0.147288	0.189059	1	0
L204_101943-t1	2348.32	0.817313	4.79464e-10	1.21332	1	0
L204_101944-t1	3893.8	-0.794071	1.48392e-07	-0.381682	0	1
L204_101945-t1	1217.6	0.626775	0.000136551	1.02042	1	0
L204_101946-t1	59727.5	-1.15511	2.26936e-14	-0.751035	0	1
L204_101947-t1	2917.07	-0.0745516	0.646328	0.319121	1	0
L204_101948-t1	7651.34	0.401415	0.00396353	0.80827	1	0
L204_101949-t1	178.744	2.24207	1.50738e-16	2.65932	1	0
L204_101950-t1	8013.82	1.10059	5.21056e-21	1.50206	1	0
L204_101951-t1	135.869	1.25492	4.11498e-07	1.67031	1	0
L204_101952-t1	3025	0.712591	8.66368e-08	1.10455	1	0
L204_101953-t1	2172.49	0.712612	5.43268e-07	1.11684	1	0
L204_101954-t1	931.662	2.06311	1.56855e-27	2.44284	1	0
L204_101955-t1	57613.4	5.74033	9.43499e-250	6.11979	1	0
L204_101956-t1	10977.4	5.28307	4.18671e-237	5.6642	1	0
L204_101957-t1	6269.65	0.265198	0.0538205	0.654417	1	0
L204_101958-t1	10943.9	0.245604	0.168863	0.668192	1	0
L204_101959-t1	6599.41	0.593018	6.25944e-05	0.972303	1	0
L204_101960-t1	1116.07	3.33166	5.40813e-81	3.72446	1	0
L204_101961-t1	3448.26	3.91732	4.81557e-73	4.34324	1	0
L204_101962-t1	6091.46	0.82464	2.09242e-09	1.22648	1	0
L204_101963-t1	951.945	0.252747	0.27531	0.686639	1	0
L204_101964-t1	2954.4	-1.0157	1.97311e-11	-0.608062	0	1
L204_101965-t1	3144.79	-0.4108	0.00358004	-0.0103788	0.329	0.671
L204_101966-t1	1141.82	-1.71563	1.16952e-29	-1.32469	0	1
L204_101967-t1	4978.08	-0.0491716	0.770905	0.359836	1	0
L204_101968-t1	3358.55	-0.765715	3.04752e-09	-0.372038	0	1
L204_101969-t1	1578.96	1.05848	1.20318e-11	1.44278	1	0
L204_101970-t1	2288.63	0.89595	1.32619e-10	1.28583	1	0
L204_101971-t1	3354.86	0.0470381	0.723887	0.451256	1	0
L204_101972-t1	155.09	2.52311	1.85408e-21	2.94683	1	0
L204_101973-t1	2139.13	-0.156338	0.254607	0.243255	1	0
L204_101974-t1	4487.72	-0.283405	0.0330776	0.123123	1	0
L204_101975-t1	2433.1	-0.160263	0.299293	0.250343	1	0
L204_101976-t1	2274.58	0.102421	0.587636	0.525026	1	0
L204_101977-t1	1831.15	-1.00996	3.12053e-07	-0.598022	0	1
L204_101978-t1	7132.31	0.352551	0.00394452	0.75375	1	0
L204_101979-t1	12388.1	-0.329156	0.0702574	0.0684782	1	0
L204_101980-t1	4209.52	1.20162	4.06639e-13	1.62038	1	0
L204_101981-t1	6890.64	1.03808	2.69989e-12	1.43836	1	0
L204_101982-t1	1350.51	0.173282	0.229725	0.574353	1	0
L204_101983-t1	6669.49	-0.792613	4.80647e-09	-0.39963	0	1
L204_101984-t1	7460.99	-0.760333	6.32049e-08	-0.347099	0	1
L204_101985-t1	4840.55	-0.748882	2.2087e-05	-0.333664	0	1
L204_101986-t1	3687.06	-0.0268936	0.847787	0.368075	1	0
L204_101987-t1	1981.69	1.25721	2.54482e-19	1.66098	1	0
L204_101988-t1	2351.31	0.760557	3.85165e-05	1.17989	1	0
L204_101990-t1	31244.1	0.927259	2.12524e-14	1.32083	1	0
L204_101991-t1	4987.29	0.319515	0.0226293	0.704633	1	0
L204_101992-t1	11801.9	-0.316661	0.0391389	0.067267	1	0
L204_101993-t1	8590.16	0.316775	0.0161098	0.709088	1	0
L204_101994-t1	5396.84	-1.05611	1.46095e-09	-0.630089	0	1
L204_101995-t1	1103.19	0.295357	0.151764	0.683041	1	0
L204_101996-t1	1661.94	0.128749	0.509082	0.559971	1	0
L204_101997-t1	25923.6	-1.59771	5.10944e-32	-1.19299	0	1
L204_101998-t1	8843.44	0.54687	1.96941e-05	0.948242	1	0
L204_101999-t1	5659.16	0.588494	0.00022919	0.994934	1	0
L204_102000-t1	1584.02	-0.918579	1.57938e-07	-0.539998	0	1
L204_102001-t1	6055.07	-0.174186	0.247563	0.233189	1	0
L204_102002-t1	404.92	0.389049	0.0209533	0.790322	1	0
L204_102003-t1	2376.14	1.31021	1.06534e-12	1.70005	1	0
L204_102004-t1	3400.52	1.27808	1.00118e-16	1.66825	1	0
L204_102005-t1	5380.53	0.146169	0.290373	0.534699	1	0
L204_102006-t1	3147.81	-1.33731	1.03933e-18	-0.945847	0	1
L204_102007-t1	5623.66	-0.370742	0.00755681	0.017024	0.87	0.13
L204_102008-t1	13090.5	-1.03999	1.08367e-10	-0.622237	0	1
L204_102009-t1	1350.68	0.0419498	0.792227	0.432906	1	0
L204_102010-t1	4644.21	1.79606	5.37398e-21	2.19471	1	0
L204_102011-t1	5236.25	-1.54349	1.74587e-26	-1.15122	0	1
L204_102012-t1	32966.2	0.794334	4.80582e-10	1.1856	1	0
L204_102013-t1	5949.07	0.813967	8.78922e-10	1.20468	1	0
L204_102014-t1	784.639	-0.339325	0.0720892	0.077243	0.969	0.031
L204_102015-t1	2371.25	-0.302992	0.028633	0.0830023	0.999	0.001
L204_102016-t1	3118.92	-0.790812	1.03436e-09	-0.388112	0	1
L204_102017-t1	508.798	-0.321512	0.0370682	0.0823075	0.934	0.066
L204_102018-t1	3266.01	-0.62848	8.3209e-05	-0.209254	0	1
L204_102019-t1	13733.4	-1.68148	5.9926e-35	-1.28695	0	1
L204_102020-t1	7905.63	1.25293	2.61974e-13	1.63007	1	0
L204_102021-t1	4873.9	0.231573	0.104062	0.630322	1	0
L204_102022-t1	9431.04	0.621301	8.75373e-05	1.01628	1	0
L204_102023-t1	1884.68	-0.458391	0.00529126	-0.0508012	0.021	0.979
L204_102024-t1	18343.5	0.370075	0.0378867	0.79688	1	0
L204_102025-t1	50317.2	-0.576908	6.17791e-06	-0.178645	0	1
L204_102026-t1	4665.4	0.707042	8.872e-09	1.10549	1	0
L204_102027-t1	4040.85	-0.454206	0.00191933	-0.0510797	0.002	0.998
L204_102028-t1	2921.71	-0.239941	0.0529086	0.163112	1	0
L204_102029-t1	12653	-0.402163	0.0270345	0.0288379	0.997	0.003
L204_102030-t1	1757.86	0.706738	3.5677e-05	1.09365	1	0
L204_102031-t1	2024.05	-0.271967	0.0501981	0.124077	1	0
[truncated: 4,332 more rows]
